# Supplementary material
Source: ML conference proceedings conference paper supplement (https://openreview.net/forum?id=9NzCUqU7i1)
Supplement: supplementary_material [file attachment]

## Sheet: page_1
	Date	T(lower)	T(upper)	P0(lower)	P0(upper)	P(lower)	P(upper)	U(lower)	U(upper)	Td(lower)	Td(upper)	Y
0	2021.12.31	10.6	13.3	757.8	760.3	759.4	762.1	-1.8	1.2	81	93	1
1	2021.12.30	8.3	12.2	757.3	759.6	758.9	761.1	-1.5	1.2	83	93	1
2	2021.12.29	9.4	11.7	753.7	759.6	755.5	761.1	-1.5	1.6	48	90	1
3	2021.12.28	4.4	13.3	755.2	759.8	757	761.5	-1.7	1.5	29	86	1
4	2021.12.27	4.4	6.1	756.1	763.6	757.6	765.3	-2.3	0.2	58	79	0
5	2021.12.26	7.8	16.1	753.5	763.4	754.9	765	-0.7	2.3	46	78	1
6	2021.12.25	10	19.4	748.9	755	750.4	756.7	-2.3	2.3	47	84	1
7	2021.12.24	4.4	12.2	757.3	762.4	759	764	-2.5	0.8	40	61	0
8	2021.12.23	-1.1	5	763.4	768.2	764.9	769.9	-1.3	1.8	38	55	0
9	2021.12.22	2.8	10.6	752.5	761.6	754	763.2	-3	3.3	34	93	0
10	2021.12.21	-1.1	6.1	757.3	765.4	758.8	766.9	-2.4	-0.2	49	89	0
11	2021.12.20	-1.7	5	766.9	771.5	768.6	773.2	-1.8	1.3	35	66	0
12	2021.12.19	2.2	13.3	756.3	768.4	758	769.9	-0.3	3	43	87	0
13	2021.12.18	10.6	12.8	756.1	764.9	757.6	766.5	-2.5	-0.5	28	87	1
14	2021.12.17	12.8	18.3	760.1	765.7	761.7	767.2	-0.7	2.2	26	77	1
15	2021.12.16	7.8	18.3	760.6	767.5	762.4	769	-2.8	0	40	86	1
16	2021.12.15	3.3	14.4	769	775.8	770.5	777.4	-2.2	0.3	60	83	1
17	2021.12.14	2.2	15	769.5	775.3	771.1	777	-0.2	1.5	29	79	0
18	2021.12.13	1.1	10.6	768.2	770.2	769.9	771.9	-1.8	0.7	41	76	0
19	2021.12.12	5	10.6	759.6	769	761.1	770.5	0	4.6	25	48	0
20	2021.12.11	9.4	20.6	751.2	760.6	752.8	762.4	-3.1	3.8	45	89	1
21	2021.12.10	4.4	11.7	762.4	764.9	764	766.5	-1.5	1	49	77	1
22	2021.12.09	0	6.1	763.4	767.9	765.1	769.5	-1	1.8	42	64	0
23	2021.12.08	2.8	6.1	758.1	763.9	759.6	765.4	-2.7	2	49	60	0
24	2021.12.07	2.8	6.1	762.6	767.7	764.3	769.3	-1.3	3	28	43	0
25	2021.12.06	7.2	21.1	752.2	763.4	753.8	765.1	-3.9	6.4	26	77	1
26	2021.12.05	2.8	10.6	765.4	770.5	766.9	772	-1.8	1.6	39	76	0
27	2021.12.04	6.1	13.9	762.4	766.2	763.9	767.8	-0.5	1.8	36	71	1
28	2021.12.03	7.8	16.1	755.5	762.6	757.1	764.3	-0.7	3.3	38	66	0
29	2021.12.02	7.2	17.8	752.5	760.1	754	761.6	-3	1.1	45	77	1
30	2021.12.01	1.1	13.3	761.8	766.7	763.3	768.2	-2.1	1.8	37	85	1
31	2021.11.30	1.7	10	758.8	763.1	760.4	764.5	-2	1.3	39	76	0
32	2021.11.29	2.8	8.3	757.6	762.6	759.3	764.3	-1	1.6	35	55	0
33	2021.11.28	3.3	12.8	755	758.5	756.7	760	-1.8	1.3	37	65	0
34	2021.11.27	1.1	7.2	759.6	762.1	761.2	763.6	-1.2	1.5	35	48	0
35	2021.11.26	2.2	9.4	754.3	759.6	755.8	761.1	-1.6	2.1	34	89	0
36	2021.11.25	2.2	12.2	756.8	767.7	758.4	769.4	-3.1	-0.9	40	70	0
37	2021.11.24	0	8.3	768.2	772.3	769.8	773.8	-1.8	1.8	34	65	0
38	2021.11.23	0.6	6.7	762.1	767.5	763.6	769.1	-0.8	1.8	32	52	0
39	2021.11.22	3.9	11.7	757.6	761.6	759.1	763.3	-1.8	2.3	38	86	1
40	2021.11.21	3.3	11.1	761.1	770.5	762.7	772.2	-3	-0.5	47	89	1
41	2021.11.20	1.1	8.3	771.7	775.6	773.2	777.1	-1.8	1.1	46	71	0
42	2021.11.19	3.9	8.9	765.4	774.3	767	775.9	0	2.8	34	50	0
43	2021.11.18	9.4	22.8	758.8	763.6	760.4	765.3	-2.8	3.3	40	80	1
44	2021.11.17	5	16.7	763.9	767.5	765.6	769	-2.4	0.8	50	82	1
45	2021.11.16	3.9	11.7	764.4	767.2	766	768.7	-1.3	1.1	43	74	0
46	2021.11.15	5.6	10	755.2	764.4	756.9	766	-1.1	2.2	37	63	0
47	2021.11.14	1.1	8.9	756.3	761.6	757.9	763.2	-2.8	1	44	76	0
48	2021.11.13	5.6	11.1	755.2	761.1	756.7	762.6	-1.6	2	33	90	1
49	2021.11.12	10.6	17.8	757.6	759.8	759.1	761.5	-2	2	43	86	1
50	2021.11.11	8.9	19.4	761.4	766.4	763	768	-2.5	0.5	65	86	1
51	2021.11.10	10	21.7	761.6	765.9	763.3	767.5	-1	1.5	41	89	1
52	2021.11.09	7.2	21.7	762.1	765.7	763.6	767.3	-2.1	0.3	33	86	1
53	2021.11.08	7.2	20.6	763.6	766.2	765.1	767.9	-1.1	1.6	38	75	1
54	2021.11.07	4.4	14.4	763.6	766.7	765.2	768.4	-1.8	0.3	36	79	1
55	2021.11.06	1.7	13.9	767.5	771	769	772.7	-2.3	0.2	42	79	1
56	2021.11.05	2.2	12.8	767.5	771	769.1	772.6	-1.1	1.5	31	73	0
57	2021.11.04	3.9	11.1	767.2	769.7	768.9	771.2	-1.3	0.3	37	76	0
58	2021.11.03	4.4	11.1	767.7	769.7	769.3	771.4	-1.3	1	38	82	0
59	2021.11.02	7.8	10.6	766.2	767.9	767.8	769.5	-1.2	1.2	66	83	1
60	2021.11.01	10.6	16.7	759.8	766.7	761.3	768.3	-0.3	2.2	32	75	1
61	2021.10.31	11.1	19.4	749.5	759.1	751	760.6	-0.7	2.3	49	93	1
62	2021.10.30	13.3	17.2	748.2	750.2	749.6	751.7	-0.8	1	63	90	1
63	2021.10.29	14.4	16.1	746.4	755.5	748	757	-2.2	1.8	78	90	1
64	2021.10.28	11.7	18.3	756.8	759.3	758.5	760.9	-1.5	1	56	83	1
65	2021.10.27	11.7	21.7	751.7	757.6	753.4	759.2	-0.3	1.3	49	72	1
66	2021.10.26	12.2	18.3	748.9	751.9	750.4	753.5	-2.9	1.5	49	90	1
67	2021.10.25	16.7	25	752.8	760.9	754.3	762.5	-2.5	-0.4	54	90	1
68	2021.10.24	13.3	21.1	761.6	765.1	763	766.8	-1.3	1.3	53	78	1
69	2021.10.23	12.8	20	759.1	762.6	760.6	764.2	-1.5	2.1	45	77	1
70	2021.10.22	15	21.1	756.5	760.1	758.2	761.5	-1.3	1.5	41	73	1
71	2021.10.21	12.2	23.3	757	762.4	758.5	764	-2.2	0	41	87	1
72	2021.10.20	12.8	24.4	762.6	765.1	764.2	766.7	-1.5	0.8	35	75	1
73	2021.10.19	8.9	23.3	762.1	765.1	763.7	766.7	-1.7	0.8	31	77	1
74	2021.10.18	9.4	20	759.3	762.6	760.9	764.1	-1.8	1.7	32	71	1
75	2021.10.17	12.2	17.8	758.8	760.9	760.3	762.4	-1	1.3	37	72	1
76	2021.10.16	15	27.2	751.7	758.5	753.2	760.1	-1.8	3.1	58	87	1
77	2021.10.15	18.3	26.1	757	759.8	758.7	761.5	-1.3	0.8	62	84	1
78	2021.10.14	17.2	27.2	758.8	761.1	760.4	762.7	-1.3	0.8	44	90	1
79	2021.10.13	18.9	22.8	760.3	762.4	761.9	763.9	-1.3	0.8	73	91	1
80	2021.10.12	18.3	22.2	761.8	763.4	763.4	765.1	-0.8	1	73	91	1
81	2021.10.11	18.3	20.6	761.1	762.4	762.7	764	-0.8	1	70	84	1
82	2021.10.10	18.9	22.8	761.4	762.9	762.8	764.5	-0.8	0.8	69	90	1
83	2021.10.09	18.9	22.8	762.9	764.4	764.5	765.9	-1	0.8	64	84	1
84	2021.10.08	19.4	25	762.9	764.9	764.5	766.5	-1	0.5	52	87	1
85	2021.10.07	18.3	25.6	765.4	768.7	766.9	770.2	-1.2	0.2	52	84	1
86	2021.10.06	20	22.2	767.9	769.7	769.4	771.2	-0.8	1.1	76	93	1
87	2021.10.05	20.6	27.2	761.6	767.2	763.2	768.9	-0.2	1.8	65	90	1
88	2021.10.04	21.1	27.8	757.8	761.1	759.3	762.7	-0.8	1.5	56	84	1
89	2021.10.03	17.2	27.2	758.1	762.1	759.7	763.6	-1.8	0.2	54	97	1
90	2021.10.02	13.9	25.6	762.4	766.7	764	768.1	-1.8	0.2	56	90	1
91	2021.10.01	13.9	22.8	766.2	768.4	767.7	769.9	-1.5	1.2	41	78	1
92	2021.09.30	13.9	23.9	763.1	765.9	764.6	767.4	-0.8	1.5	39	78	1
93	2021.09.29	16.1	22.8	759.1	762.6	760.6	764.2	-1	1.7	34	73	1
94	2021.09.28	17.8	27.2	757	758.3	758.8	760	-0.6	0.7	53	78	1
95	2021.09.27	14.4	26.1	758.3	762.6	760	764.3	-1.8	0.5	41	78	1
96	2021.09.26	16.7	25	759.8	762.1	761.3	763.7	-1	1.6	30	67	1
97	2021.09.25	14.4	23.9	758.8	762.6	760.5	764.2	-1.8	0.8	40	84	1
98	2021.09.24	13.9	23.3	760.9	763.6	762.4	765.2	-1	1.3	35	74	1
99	2021.09.23	16.7	24.4	754	760.9	755.5	762.5	-1.6	2.8	57	87	1
100	2021.09.22	22.2	26.7	756.8	763.9	758.3	765.6	-2	0	76	88	1
101	2021.09.21	18.3	26.7	764.9	767.7	766.6	769.4	-1.1	0.5	56	84	1
102	2021.09.20	18.9	26.7	766.4	768.2	768.1	769.9	-0.7	1.3	50	84	1
103	2021.09.19	22.2	27.8	762.9	765.7	764.4	767.3	-1	1.5	51	84	1
104	2021.09.18	21.7	28.9	761.1	763.9	762.7	765.4	-1.5	0.8	65	91	1
105	2021.09.17	22.8	27.2	763.6	765.7	765.2	767.4	-1.1	1	69	91	1
106	2021.09.16	22.8	28.3	761.4	764.6	762.9	766.3	-0.5	1.7	65	88	1
107	2021.09.15	22.8	31.7	758.3	761.1	759.9	762.8	-0.8	1.8	45	85	1
108	2021.09.14	22.8	31.1	759.6	762.4	761.3	763.9	-1.5	0.3	55	87	1
109	2021.09.13	22.2	31.7	761.6	763.4	763.2	765	-1.3	0.8	46	82	1
110	2021.09.12	18.9	29.4	762.4	765.1	763.9	766.7	-1.3	0.5	48	79	1
111	2021.09.11	17.2	26.1	764.2	766.9	765.7	768.4	-1.5	1.3	45	81	1
112	2021.09.10	17.8	25	757.8	763.4	759.3	765.1	0	1.8	37	65	1
113	2021.09.09	20.6	25.6	755	757.3	756.6	758.8	-0.9	1.8	54	87	1
114	2021.09.08	20.6	28.9	754	758.8	755.7	760.3	-1.5	0.8	65	84	1
115	2021.09.07	18.9	28.9	758.5	760.9	760.2	762.6	-1.6	0.8	40	84	1
116	2021.09.06	22.8	30	756.5	758.8	758.2	760.6	-1	1.3	33	84	1
117	2021.09.05	20.6	25	756.1	758.5	757.5	760	-1.2	0.2	69	81	1
118	2021.09.04	17.2	26.1	759.3	762.9	760.9	764.6	-1.6	0.3	48	81	1
119	2021.09.03	16.1	26.1	761.4	763.4	762.9	765.1	-1	1.3	40	72	1
120	2021.09.02	17.8	26.1	753.7	761.1	755.4	762.8	-0.3	2.3	35	76	1
121	2021.09.01	20	27.8	747.7	754.5	749.3	756.1	-2.5	3	77	88	1
122	2021.08.31	23.9	29.4	755.2	756.8	756.8	758.3	-0.9	1	61	82	1
123	2021.08.30	24.4	32.2	756.1	761.4	757.7	762.9	-1.7	0.2	50	88	1
124	2021.08.29	22.8	28.3	762.1	765.7	763.7	767.4	-1.8	0.6	63	85	1
125	2021.08.28	24.4	32.8	763.1	766.2	764.8	767.7	-0.8	1.6	54	88	1
126	2021.08.27	25	32.8	761.6	763.9	763.3	765.4	-0.8	1.8	57	88	1
127	2021.08.26	24.4	30.6	762.4	764.2	764.1	765.7	-1.1	0.7	67	82	1
128	2021.08.25	24.4	33.3	761.8	763.9	763.5	765.4	-1.3	0.8	52	97	1
129	2021.08.24	25	33.3	758.3	761.4	760	763	-0.8	1.8	43	79	1
130	2021.08.23	23.3	33.9	756.3	757.8	758	759.5	-0.8	1	44	85	1
131	2021.08.22	23.9	28.3	757	758.1	758.8	759.7	-0.8	0.8	64	85	1
132	2021.08.21	23.9	29.4	756.5	758.1	758.1	759.7	-1.1	1	61	82	1
133	2021.08.20	22.8	28.9	757.6	759.3	759.2	760.9	-1.7	0.5	57	91	1
134	2021.08.19	25	32.8	759.1	761.4	760.8	763	-1.2	0.5	49	85	1
135	2021.08.18	26.1	30.6	760.3	763.9	761.9	765.4	-2	0.8	70	88	1
136	2021.08.17	22.8	30.6	763.1	764.6	764.7	766.3	-1.1	1.1	59	88	1
137	2021.08.16	22.8	26.7	763.4	765.1	764.9	766.9	-1	0.7	69	90	1
138	2021.08.15	22.8	28.3	763.6	765.9	765.2	767.6	-0.9	1.5	51	90	1
139	2021.08.14	23.3	33.3	762.1	763.6	763.7	765.1	-0.8	1.2	43	88	1
140	2021.08.13	24.4	35.6	760.6	763.1	762.2	764.7	-1.5	2.3	41	85	1
141	2021.08.12	23.9	35.6	759.8	762.4	761.5	764.1	-1.3	0.8	44	85	1
142	2021.08.11	23.9	34.4	760.1	762.4	761.8	764	-1	1.3	51	85	1
143	2021.08.10	24.4	33.9	760.9	763.9	762.6	765.4	-1.3	2	49	85	1
144	2021.08.09	23.3	32.2	761.8	764.2	763.6	765.7	-1.3	1.3	52	88	1
145	2021.08.08	20.6	32.2	761.1	762.6	762.6	764.2	-0.7	1	38	84	1
146	2021.08.07	21.1	24.4	761.1	763.1	762.7	764.8	-1.3	0.3	76	87	1
147	2021.08.06	22.2	32.2	763.1	765.4	764.8	766.9	-1.3	0.9	39	79	1
148	2021.08.05	19.4	29.4	762.4	764.2	764	765.7	-1	1	39	76	1
149	2021.08.04	20.6	27.8	762.4	763.4	764	764.9	-0.5	1	40	79	1
150	2021.08.03	20	27.2	761.8	763.4	763.6	764.9	-0.8	0.6	45	79	1
151	2021.08.02	19.4	27.8	758.1	762.9	759.7	764.5	-0.2	1.8	40	78	1
152	2021.08.01	22.2	26.1	755.8	758.1	757.5	759.7	-1.2	1.7	67	87	1
153	2021.07.31	21.1	27.2	758.5	761.8	760.2	763.4	-1.5	1.1	45	62	1
154	2021.07.30	25	32.2	754.8	759.1	756.3	760.7	-1	1.3	31	88	1
155	2021.07.29	23.3	29.4	755.8	760.3	757.4	761.8	-2.3	0.5	63	88	1
156	2021.07.28	24.4	33.9	759.1	760.9	760.6	762.5	-0.7	1.8	37	82	1
157	2021.07.27	22.8	34.4	758.5	760.3	760.2	761.9	-0.8	1.1	35	87	1
158	2021.07.26	23.9	36.1	757.8	759.8	759.4	761.4	-0.5	0.4	34	85	1
159	2021.07.25	23.3	31.1	756.8	760.3	758.5	762	-1.2	1.3	55	76	1
160	2021.07.24	22.2	30	760.9	763.6	762.4	765.1	-1.2	0.5	46	71	1
161	2021.07.23	21.1	29.4	763.4	765.1	764.9	766.7	-0.9	1.2	32	66	1
162	2021.07.22	21.1	28.3	762.1	764.4	763.6	766	-0.8	1	35	66	1
163	2021.07.21	24.4	30	757.3	761.1	758.9	762.6	-0.8	2.6	50	72	1
164	2021.07.20	23.3	32.8	757.6	759.8	759.1	761.5	-1.3	0.7	37	76	1
165	2021.07.19	23.3	31.1	760.1	762.1	761.7	763.8	-1.3	0.7	45	71	1
166	2021.07.18	23.9	27.2	760.3	762.1	762.1	763.7	-0.5	0.9	51	77	1
167	2021.07.17	26.1	33.9	759.3	761.8	760.9	763.4	-1.7	0.5	54	74	1
168	2021.07.16	26.1	33.3	760.1	761.8	761.8	763.6	-1.5	0.7	44	71	1
169	2021.07.15	22.8	31.7	761.1	764.4	762.7	765.9	-1.3	0.8	50	87	1
170	2021.07.14	23.3	32.2	763.6	765.1	765.4	766.9	-0.7	0.6	43	85	1
171	2021.07.13	26.1	32.8	763.4	764.9	765	766.6	-1	0.6	53	79	1
172	2021.07.12	25.6	32.8	761.1	763.6	762.8	765.3	-0.5	1.5	61	82	1
173	2021.07.11	23.9	31.7	759.3	762.1	760.9	763.7	-1.2	1.3	59	77	1
174	2021.07.10	21.7	28.3	759.3	761.6	761	763.2	-0.8	1.5	48	94	1
175	2021.07.09	21.7	31.7	756.1	759.1	757.6	760.8	-0.4	1.5	52	90	1
176	2021.07.08	22.8	28.3	756.5	759.8	758.2	761.5	-2.3	0.5	61	84	1
177	2021.07.07	25	33.9	758.3	760.6	759.9	762.3	-1	0.6	50	79	1
178	2021.07.06	23.3	33.3	759.6	762.4	761.2	763.9	-1.3	0.8	51	79	1
179	2021.07.05	22.2	31.1	759.8	762.1	761.5	763.7	-0.5	1.3	52	82	1
180	2021.07.04	18.3	28.9	757.3	759.6	758.8	761.2	-0.5	1.1	43	78	1
181	2021.07.03	18.3	27.2	754.8	757.8	756.4	759.3	-0.8	2	42	76	1
182	2021.07.02	21.7	27.2	754	755.8	755.6	757.3	-0.8	1	37	91	1
183	2021.07.01	22.2	32.2	755.2	759.3	756.9	761.1	-2.3	1.1	54	87	1
184	2021.06.30	25	34.4	759.3	763.9	760.9	765.6	-1.5	0.8	44	79	1
185	2021.06.29	25	33.3	763.9	767.2	765.6	768.7	-1.3	0.7	51	82	1
186	2021.06.28	24.4	32.2	765.1	766.7	766.9	768.4	-0.5	1	56	85	1
187	2021.06.27	23.3	31.1	764.2	765.7	765.9	767.3	-0.8	0.6	59	88	1
188	2021.06.26	22.8	28.9	764.2	766.2	765.7	767.8	-1	0.4	63	91	1
189	2021.06.25	17.2	26.7	765.9	769	767.6	770.5	-1.2	1.1	48	78	1
190	2021.06.24	16.7	25.6	767.5	769.5	769.1	771.1	-1.3	1.1	39	73	1
191	2021.06.23	14.4	25	762.1	768.2	763.7	769.6	-0.2	2	29	70	1
192	2021.06.22	18.3	23.9	752.5	760.9	754	762.4	-0.7	2.6	57	90	1
193	2021.06.21	23.9	31.7	750.4	754.3	752.1	755.8	-2.1	1.7	57	88	1
194	2021.06.20	23.3	30.6	754.8	757.3	756.4	759	-1.3	1	59	88	1
195	2021.06.19	23.3	28.3	755	757.3	756.7	758.8	-1.8	1	51	72	1
196	2021.06.18	16.7	28.9	757.6	762.6	759.1	764.1	-1.8	0.3	37	63	1
197	2021.06.17	17.2	26.1	759.8	762.1	761.5	763.6	-0.5	1.3	23	49	1
198	2021.06.16	19.4	26.7	757	759.6	758.5	761.3	0	1.2	30	59	1
199	2021.06.15	20	26.1	754.5	756.8	756.1	758.4	-0.5	0.8	45	87	1
200	2021.06.14	20	30	753.5	757	755	758.5	-1.6	1.3	51	87	1
201	2021.06.13	20	27.8	756.3	758.8	757.9	760.3	-1.8	1.3	56	81	1
202	2021.06.12	18.3	26.1	755.5	757.8	757.1	759.3	-0.7	1	54	90	1
203	2021.06.11	19.4	21.1	755.8	758.8	757.3	760.3	-1	0.4	90	93	1
204	2021.06.10	22.2	30.6	758.3	760.1	760	761.7	-1.3	0.8	55	88	1
205	2021.06.09	25.6	31.1	760.1	761.8	761.8	763.5	-1.3	0.8	55	79	1
206	2021.06.08	25	31.1	760.3	762.9	762.1	764.5	-1.3	1	63	79	1
207	2021.06.07	24.4	31.1	761.1	763.4	762.7	764.8	-1.3	1	61	79	1
208	2021.06.06	22.2	33.3	760.9	762.6	762.4	764.3	-0.9	1.2	38	79	1
209	2021.06.05	20.6	32.8	760.1	761.6	761.7	763.1	-0.8	1.5	37	87	1
210	2021.06.04	21.1	28.3	757.8	760.3	759.4	761.9	-1	1.8	40	93	1
211	2021.06.03	19.4	27.8	758.5	762.6	760.1	764.2	-1.6	0.7	60	93	1
212	2021.06.02	18.3	27.2	763.4	765.7	764.9	767.4	-1.5	0.5	47	73	1
213	2021.06.01	15	24.4	765.7	768.2	767.3	769.7	-1.3	1	54	81	1
214	2021.05.31	10.6	23.3	766.7	768.4	768.2	770	-0.9	1.2	37	80	1
215	2021.05.30	10	13.9	763.1	766.4	764.7	768	-0.2	1	69	86	1
216	2021.05.29	11.1	14.4	754.5	763.1	756.1	764.8	0	2.3	83	90	1
217	2021.05.28	16.7	23.9	754	760.6	755.5	762.1	-2.5	0.5	53	93	1
218	2021.05.27	22.2	29.4	759.3	761.4	760.9	763	-1.3	1	32	76	1
219	2021.05.26	21.1	31.1	757.8	763.4	759.4	765.1	-2.5	1.5	50	88	1
220	2021.05.25	15	25.6	764.2	767.9	765.8	769.6	-2.1	0.4	58	81	1
221	2021.05.24	16.1	26.1	761.6	768.4	763.3	769.9	-0.2	3.1	58	81	1
222	2021.05.23	24.4	33.9	759.3	763.1	760.9	764.6	-1.5	1.3	33	47	1
223	2021.05.22	17.8	31.7	764.2	769.9	765.7	771.6	-1.8	0	34	61	1
224	2021.05.21	16.1	28.3	771	774.3	772.6	775.9	-1.5	1.3	31	70	1
225	2021.05.20	17.8	32.2	769.2	772.8	770.7	774.4	-0.6	1.6	24	81	1
226	2021.05.19	15.6	28.9	768.4	769.9	770	771.6	-0.8	1.2	30	71	1
227	2021.05.18	13.3	25.6	767.7	770.5	769.3	772.2	-1.6	1	33	77	1
228	2021.05.17	12.2	22.8	767.5	768.7	769	770.3	-0.7	1.2	38	87	1
229	2021.05.16	13.9	21.7	766.4	767.7	768.1	769.3	-0.8	0.8	41	67	1
230	2021.05.15	11.7	25.6	765.1	767.2	766.9	768.7	-1.1	1	19	69	1
231	2021.05.14	11.7	21.7	765.7	767.5	767.4	769	-0.8	1.1	25	64	1
232	2021.05.13	10.6	21.7	765.7	767.9	767.2	769.6	-1.2	1	23	71	1
233	2021.05.12	10.6	18.9	765.1	767.7	766.9	769.2	-1.6	1.6	32	55	1
234	2021.05.11	12.8	20	762.1	764.6	763.6	766.2	-1.3	1.7	32	45	1
235	2021.05.10	12.8	21.1	753	762.1	754.5	763.8	-0.2	3	46	62	1
236	2021.05.09	8.9	19.4	753.2	763.9	754.9	765.4	-3	1	49	73	1
237	2021.05.08	7.2	15.6	757.6	763.1	759.1	764.7	-0.6	2	39	86	1
238	2021.05.07	10	17.8	756.5	759.1	758.1	760.7	-1.1	0.8	48	80	1
239	2021.05.06	10	17.8	759.3	762.4	761	764	-1.6	1.3	37	53	1
240	2021.05.05	14.4	26.1	752.2	759.6	753.8	761.1	-0.6	3.3	52	93	1
241	2021.05.04	18.9	27.2	752.5	754.8	754.2	756.3	-1.3	1.3	54	90	1
242	2021.05.03	18.9	23.9	752.2	757.3	753.8	758.8	-2	1	59	79	1
243	2021.05.02	13.3	28.3	754.8	758.1	756.4	759.5	-1.1	0.7	28	55	1
244	2021.05.01	8.3	20.6	758.5	762.1	760.3	763.7	-1.8	1.7	19	45	0
245	2021.04.30	12.2	22.2	750.2	758.3	751.8	759.9	-0.5	2.9	24	68	1
246	2021.04.29	20.6	27.8	748.2	756.1	749.8	757.7	-2.4	0.6	48	76	1
247	2021.04.28	17.8	27.8	755.5	759.1	757.3	760.6	-1.8	0.8	45	78	1
248	2021.04.27	11.7	28.9	757.8	762.6	759.4	764.2	-2	0.3	30	66	1
249	2021.04.26	8.3	20	760.3	764.4	761.9	766	-1.3	1.8	22	58	0
250	2021.04.25	10.6	19.4	752.5	758.5	754	760.1	-2.8	1.7	41	92	1
251	2021.04.24	7.2	18.3	756.5	763.4	758.1	765.1	-1.8	1	33	86	1
252	2021.04.23	5	17.2	761.4	765.1	763	766.6	-2	1.2	27	60	0
253	2021.04.22	2.8	11.1	760.1	762.9	761.7	764.4	-0.5	1.8	29	52	0
254	2021.04.21	6.1	18.3	751.9	759.1	753.4	760.6	-1.8	2.4	34	62	1
255	2021.04.20	9.4	23.3	756.5	760.3	758.2	761.9	-1.8	1.2	33	86	1
256	2021.04.19	11.7	16.7	756.3	758.8	757.9	760.3	-1	1.5	52	77	1
257	2021.04.18	9.4	18.3	756.8	758.5	758.4	760.3	-1.2	0.9	34	64	1
258	2021.04.17	6.1	15.6	755.8	757.3	757.4	758.8	-0.7	1	46	74	1
259	2021.04.16	6.7	15	754	756.5	755.6	758	-1.3	1.5	38	60	0
260	2021.04.15	10	17.8	752.8	756.3	754.2	757.9	-2	1.7	35	87	1
261	2021.04.14	11.1	16.7	758.3	763.1	759.7	764.6	-2.2	0	65	90	1
262	2021.04.13	10.6	19.4	759.3	763.4	761	764.9	-1.2	1.8	51	83	1
263	2021.04.12	10.6	17.8	749.9	758.5	751.6	760.2	0.5	2.2	68	87	1
264	2021.04.11	16.1	26.1	745.9	751.5	747.5	752.9	-2.9	2	39	90	1
265	2021.04.10	12.8	22.8	753.7	761.6	755.2	763.3	-2.7	0.3	57	93	1
266	2021.04.09	11.7	16.1	761.8	763.4	763.4	765.1	-0.8	0.8	67	93	1
267	2021.04.08	12.8	21.1	760.6	762.9	762.2	764.5	-1.5	1.5	35	70	1
268	2021.04.07	12.8	26.1	757.6	760.3	759.1	762	-1.3	1.8	36	72	1
269	2021.04.06	13.3	25	758.3	761.8	759.9	763.4	-2	1.3	27	65	1
270	2021.04.05	10	21.7	759.6	764.4	761.2	765.8	-2	1.3	23	66	1
271	2021.04.04	7.2	22.2	760.3	766.7	762	768.2	-1.8	1.3	19	54	0
272	2021.04.03	1.1	13.3	767.2	772.5	768.9	774.1	-2.1	1.5	18	44	0
273	2021.04.02	0	7.8	765.7	769.7	767.2	771.4	-1.3	2.3	26	52	0
274	2021.04.01	2.2	9.4	757.8	765.4	759.3	767.1	-0.3	2	42	82	0
275	2021.03.31	13.9	17.8	757	764.6	758.7	766.1	-2.5	0.3	78	96	1
276	2021.03.30	8.3	20.6	766.2	769.7	767.7	771.4	-2	1.3	35	77	1
277	2021.03.29	6.7	15.6	758.5	767.9	760.3	769.5	-0.8	3.1	24	48	0
278	2021.03.28	11.7	22.2	748.2	760.3	749.7	761.8	-3.5	4.9	40	93	1
279	2021.03.27	11.7	20.6	762.4	765.7	763.9	767.2	-1.8	1.8	45	77	1
280	2021.03.26	16.1	28.3	754.5	761.8	756.1	763.5	-2.5	3	23	87	1
281	2021.03.25	12.8	18.3	758.8	763.1	760.5	764.7	-1.8	1.8	78	100	1
282	2021.03.24	12.2	15	759.1	763.6	760.9	765.1	-1.6	1.8	87	97	1
283	2021.03.23	8.3	18.9	764.4	767.5	766.1	769	-1.6	0.8	50	75	1
284	2021.03.22	5	18.3	766.7	771.2	768.4	772.9	-2.3	0.5	33	67	1
285	2021.03.21	2.2	17.2	771.7	774.8	773.3	776.5	-1.5	0.7	18	79	0
286	2021.03.20	1.1	15	772.8	776.3	774.3	778	-1.3	1.3	20	54	0
287	2021.03.19	5	10.6	755.8	771.5	757.5	773.2	0.8	4	23	80	0
288	2021.03.18	8.9	11.7	751.9	762.4	753.7	763.9	-2.3	2.4	89	96	1
289	2021.03.17	5.6	10	763.1	764.6	764.7	766.3	-0.8	1.3	74	92	1
290	2021.03.16	5	7.2	763.6	768.4	765.2	769.9	-1.3	0.3	41	89	0
291	2021.03.15	1.1	8.9	767.7	771.5	769.2	773.1	-1.3	2.1	17	33	0
292	2021.03.14	8.3	17.8	760.3	766.2	762.1	767.7	-1.8	3.1	16	31	0
293	2021.03.13	8.3	15	765.4	769.9	767	771.7	-2.3	2.3	15	30	0
294	2021.03.12	13.3	21.1	763.1	765.1	764.8	766.8	-2	1.2	24	65	1
295	2021.03.11	11.7	25.6	763.6	768.4	765.2	770.2	-2.5	0.9	18	59	1
296	2021.03.10	7.2	21.1	769	772.5	770.5	774.2	-2	0.8	23	71	1
297	2021.03.09	3.3	21.7	768.7	771.2	770.5	772.9	-1.3	0.8	22	65	0
298	2021.03.08	-0.6	11.7	771.2	774.1	772.9	775.6	-1.6	0.9	17	64	0
299	2021.03.07	-2.2	8.3	767.7	771	769.3	772.7	-0.8	1.5	25	58	0
300	2021.03.06	-0.6	8.3	763.1	766.7	764.8	768.3	-1.1	1.6	30	54	0
301	2021.03.05	-2.2	6.1	761.4	763.9	763	765.4	-1.5	1.3	28	47	0
302	2021.03.04	3.3	11.7	757.6	761.4	759.1	762.8	-1.5	2.5	31	73	0
303	2021.03.03	0	15.6	757.3	763.1	759.1	764.8	-2	0.5	19	73	0
304	2021.03.02	-0.6	7.8	763.4	769.2	764.9	770.7	-1.3	2.3	25	50	0
305	2021.03.01	6.7	10.6	753.7	761.6	755.3	763.2	-2.5	3.1	33	97	1
306	2021.02.28	7.2	8.9	758.5	767.7	760.1	769.2	-2.5	0.8	86	97	1
307	2021.02.27	3.3	11.1	762.9	769	764.5	770.5	-2.6	1.7	72	93	1
308	2021.02.26	3.3	9.4	768.4	772.3	770.1	773.8	-1.3	2.5	33	89	0
309	2021.02.25	6.7	14.4	757.6	767.9	759.2	769.6	0	3.3	23	56	0
310	2021.02.24	0.6	14.4	756.3	763.4	757.8	764.8	-3.3	1.5	38	85	0
311	2021.02.23	-0.6	14.4	753.2	760.1	754.9	761.6	-2	3.3	39	96	0
312	2021.02.22	0	2.8	755.5	770.8	757.1	772.4	-4.1	1.2	56	93	0
313	2021.02.21	-3.9	3.3	772.8	776.8	774.4	778.5	-1.5	1.8	37	58	0
314	2021.02.20	-2.8	0	765.4	771.7	767.1	773.4	0	2.3	38	61	0
315	2021.02.19	-0.6	3.9	762.9	765.4	764.3	766.9	-1.8	0.8	59	92	0
316	2021.02.18	-2.2	0	766.4	771.5	768.1	773	-2.2	0	54	92	0
317	2021.02.17	-3.3	2.8	765.9	772.3	767.5	773.8	-0.9	2.3	37	55	0
318	2021.02.16	-0.6	6.7	751.5	763.6	753	765.3	-3.9	5.1	50	97	0
319	2021.02.15	2.2	4.4	759.1	765.7	760.5	767.2	-2.7	0.3	70	97	0
320	2021.02.14	-1.7	3.3	764.9	767.5	766.6	769	-0.7	1.3	70	92	0
321	2021.02.13	-1.7	-0.6	764.6	768.2	766.2	769.6	-1.6	0.5	59	89	0
322	2021.02.12	-1.1	0	767.7	769.2	769.2	770.8	-1	0.8	58	72	0
323	2021.02.11	0.6	2.2	764.6	768.7	766.1	770.3	-1.2	1.3	70	97	0
324	2021.02.10	1.1	5.6	766.9	770.5	768.5	772	-1.8	1.3	53	92	0
325	2021.02.09	0	10	762.6	769.5	764.3	770.9	-2.5	2.5	48	79	0
326	2021.02.08	-3.3	3.9	767.5	772.3	769	773.8	-1.6	2.4	39	61	0
327	2021.02.07	0	5.6	757.6	765.1	759.2	766.9	-1.8	3.6	43	93	0
328	2021.02.06	1.1	10.6	757.6	763.9	759.3	765.4	-0.5	2	32	67	0
329	2021.02.05	4.4	13.3	751	757	752.6	758.6	-2.3	3	36	77	0
330	2021.02.04	-0.6	10	757.8	761.4	759.4	763	-1.3	1.6	20	50	0
331	2021.02.03	0	5.6	750.4	756.5	751.9	758	-0.3	1.8	48	72	0
332	2021.02.02	0.6	2.2	749.2	751.5	750.6	753.1	-1.2	1	57	85	0
333	2021.02.01	-1.1	1.1	752.5	757	754.1	758.5	-2.1	0	85	89	0
334	2021.01.31	-0.6	0.6	759.1	768.2	760.6	769.9	-2.6	0	49	92	0
335	2021.01.30	-4.4	3.3	768.4	770.8	770.1	772.3	-1.3	1.1	34	55	0
336	2021.01.29	-3.9	0.6	767.2	768.4	768.7	770.1	-0.9	1	35	51	0
337	2021.01.28	-2.2	2.2	763.1	768.4	764.6	770	-1.1	1.5	32	59	0
338	2021.01.27	2.8	6.1	758.5	764.2	760.1	765.8	-0.7	2	53	96	0
339	2021.01.26	0	3.3	756.3	761.4	757.9	762.9	-1.6	1.3	89	96	1
340	2021.01.25	0	3.9	762.1	763.9	763.6	765.5	-1	0.8	50	92	0
341	2021.01.24	-3.3	2.8	764.9	769.5	766.5	771	-1.8	0.5	36	53	0
342	2021.01.23	-2.8	3.9	760.6	769	762.3	770.5	-0.3	3.1	29	46	0
343	2021.01.22	0.6	10	753.5	760.1	754.9	761.6	-0.8	2	32	78	0
344	2021.01.21	-2.8	12.2	751.7	762.1	753.4	763.6	-3.3	1	33	78	0
345	2021.01.20	1.1	6.1	758.8	763.9	760.3	765.4	-2.8	2	35	72	0
346	2021.01.19	1.1	11.1	762.9	765.4	764.4	767	-2	1.3	22	59	0
347	2021.01.18	2.2	7.2	754.8	762.6	756.3	764.2	-0.5	3.1	37	76	0
348	2021.01.17	1.1	8.3	752.8	756.1	754.3	757.6	-1.3	1.8	46	67	0
349	2021.01.16	3.3	8.3	747.9	751.7	749.5	753.2	-2.3	2.2	46	93	0
350	2021.01.15	1.7	11.1	752.5	757.8	754.1	759.4	-2.8	0.8	61	89	1
351	2021.01.14	0	12.8	755.2	757.3	757	758.8	-1.8	0.9	35	92	0
352	2021.01.13	-0.6	10	758.3	763.4	759.8	765.1	-2.8	0.3	52	86	0
353	2021.01.12	-1.1	8.9	762.6	766.2	764.3	767.7	-2	0.8	42	92	0
354	2021.01.11	-1.1	6.1	765.9	769.2	767.4	770.8	-2.5	0.8	56	82	0
355	2021.01.10	2.2	8.9	763.6	768.7	765.1	770.2	-1	2	36	65	0
356	2021.01.09	0	8.3	757.3	762.6	758.8	764.2	-1.1	1.8	28	64	0
357	2021.01.08	1.1	3.3	758.3	763.9	759.8	765.5	-2.3	0.2	57	67	0
358	2021.01.07	1.1	8.3	764.2	766.4	765.7	767.9	-1.8	0.8	44	73	0
359	2021.01.06	4.4	5.6	761.4	765.1	762.8	766.8	-1	1.3	58	73	0
360	2021.01.05	4.4	5.6	758.1	760.9	759.7	762.5	-1.2	1.5	73	82	1
361	2021.01.04	1.7	7.8	759.8	762.1	761.4	763.7	-1.8	1	68	93	1
362	2021.01.03	4.4	6.1	758.3	761.8	759.8	763.5	-2.3	0.8	74	93	1
363	2021.01.02	2.8	12.2	756.8	762.6	758.4	764.3	-2.8	1.5	57	97	1
364	2021.01.01	2.8	5	758.5	773	760.3	774.5	-7.2	1.2	60	93	0
365	2020.12.31	5	12.8	761.1	770.5	762.7	772.1	-2	3	53	86	1
366	2020.12.30	0	7.8	763.6	775.3	765.4	776.9	-4	0	40	64	0
367	2020.12.29	1.1	5.6	767.2	775.3	768.7	776.8	-0.5	3.1	28	60	0
368	2020.12.28	2.8	10	763.4	766.7	765	768.2	-1.5	1.3	53	82	1
369	2020.12.27	-2.2	5.6	764.6	769.2	766.2	770.9	-0.8	2	46	73	0
370	2020.12.26	-5	2.2	759.8	763.6	761.5	765.1	-1.5	1.8	37	55	0
371	2020.12.25	-3.3	12.2	745.6	759.3	747.3	760.9	-1.3	3.6	44	93	0
372	2020.12.24	6.1	15.6	746.9	765.7	748.6	767.3	-4.3	-1.5	73	93	1
373	2020.12.23	0.6	8.3	767.2	772	768.7	773.6	-2.5	1.3	54	82	0
374	2020.12.22	5.6	10	754	767.9	755.6	769.4	-0.3	3	46	96	1
375	2020.12.21	4.4	7.2	754.3	759.1	755.8	760.7	-2	0.2	74	93	1
376	2020.12.20	1.7	6.7	760.3	766.9	761.8	768.4	-2.1	-0.3	71	86	1
377	2020.12.19	-1.7	2.8	767.9	772	769.6	773.6	-1.8	0.5	67	76	0
378	2020.12.18	0	3.3	765.1	771.2	766.7	772.9	0	1.7	67	76	0
379	2020.12.17	-2.2	3.9	755.8	764.6	757.3	766.2	-0.8	2.1	62	88	0
380	2020.12.16	0	2.8	755.2	769.2	756.8	770.7	-4.3	0.5	66	93	0
381	2020.12.15	0.6	5.6	765.9	769.9	767.5	771.5	-0.9	2.3	43	61	0
382	2020.12.14	4.4	7.8	757.6	763.6	759.1	765.4	-1.6	2.5	62	89	1
383	2020.12.13	8.3	18.3	758.8	761.8	760.5	763.6	-1	1.3	50	86	1
384	2020.12.12	5	16.7	758.8	763.1	760.3	764.7	-2	0.3	56	93	1
385	2020.12.11	2.8	15	763.1	766.2	764.7	767.7	-2.3	0.8	49	93	1
386	2020.12.10	0	10	759.6	766.2	761.1	767.7	-0.5	2.3	54	85	1
387	2020.12.09	-0.6	6.7	755.2	760.3	756.9	761.9	-2.7	2.1	49	73	0
388	2020.12.08	1.1	7.2	755.5	760.3	757.1	761.9	-0.7	1.5	39	57	0
389	2020.12.07	0.6	4.4	755	759.1	756.6	760.6	-2.6	0.8	47	67	0
390	2020.12.06	1.7	7.2	758.5	760.6	760.3	762.2	-1.5	1.3	45	61	0
391	2020.12.05	6.7	8.9	754	759.6	755.5	761.2	-3.8	1.8	44	97	1
392	2020.12.04	8.3	11.7	758.3	764.4	760	766.1	-1.5	0.3	48	93	1
393	2020.12.03	0.6	11.7	765.4	768.7	767	770.2	-1.8	0.5	32	72	0
394	2020.12.02	2.2	9.4	759.3	766.7	760.9	768.2	0	2	31	64	0
395	2020.12.01	5	9.4	748.6	758.5	750.1	760.1	0.2	2.5	42	73	0
396	2020.11.30	11.1	17.8	743.6	759.3	745.3	761	-5.8	2.6	61	93	1
397	2020.11.29	3.3	12.8	761.8	766.2	763.4	767.8	-1.8	1	42	77	1
398	2020.11.28	7.8	15	760.6	764.4	762.3	765.9	-0.6	1.3	36	89	1
399	2020.11.27	11.7	16.1	760.6	763.6	762.1	765.2	-1.8	0.5	60	80	1
400	2020.11.26	12.2	18.9	760.3	762.9	761.9	764.4	-1.8	1.1	65	97	1
401	2020.11.25	7.2	12.8	763.9	769.5	765.5	771.1	-1.8	0.2	53	77	1
402	2020.11.24	3.9	11.1	767.9	771.2	769.6	772.8	-1	1.3	35	65	0
403	2020.11.23	7.8	13.9	759.3	767.5	760.9	769	-2.1	3.5	43	97	1
404	2020.11.22	11.1	14.4	762.4	770.2	764.1	771.9	-2.7	0.3	64	78	1
405	2020.11.21	7.8	16.7	768.7	770.2	770.3	772	-1.2	1	58	86	1
406	2020.11.20	6.1	17.2	768.4	771.5	770.1	773.2	-2	0.5	38	77	1
407	2020.11.19	0.6	11.1	771.5	776.5	773.2	778.1	-2.2	0.2	43	78	0
408	2020.11.18	2.8	7.2	770.2	776.1	771.7	777.7	-0.5	1.8	43	57	0
409	2020.11.17	5	12.8	759.8	768.7	761.5	770.4	-1.3	2.8	33	62	0
410	2020.11.16	10	16.1	759.1	762.4	760.6	763.9	-1	2.6	19	48	0
411	2020.11.15	9.4	21.7	753.5	765.7	755.2	767.4	-4.4	2.8	50	80	1
412	2020.11.14	7.2	15.6	763.4	766.9	765.1	768.5	-0.7	1.3	35	80	1
413	2020.11.13	10	16.1	760.1	763.4	761.8	764.9	-0.8	2	48	83	1
414	2020.11.12	11.1	19.4	757.3	762.1	758.8	763.8	-1	1.5	69	100	1
415	2020.11.11	17.2	20.6	758.3	762.9	760	764.5	-2	0.2	90	100	1
416	2020.11.10	12.2	23.9	763.4	766.9	765	768.5	-2	0.2	60	93	1
417	2020.11.09	11.7	22.8	767.5	769.9	769.1	771.7	-1.5	0.4	61	97	1
418	2020.11.08	10	22.8	768.7	770.8	770.4	772.3	-1.1	0.9	55	93	1
419	2020.11.07	8.3	21.7	767.5	769.5	769.1	771.1	-1.3	1	41	93	1
420	2020.11.06	10	20	766.9	769	768.6	770.7	-1.3	0.6	45	96	1
421	2020.11.05	8.9	18.9	768.7	771.7	770.5	773.5	-1.8	0.5	45	97	1
422	2020.11.04	5.6	18.3	769	772.3	770.5	773.9	-1.1	1.3	43	89	1
423	2020.11.03	4.4	17.8	761.8	767.9	763.5	769.5	-0.6	2	27	69	0
424	2020.11.02	3.9	9.4	760.3	763.1	762	764.8	-0.7	1.5	31	50	0
425	2020.11.01	9.4	14.4	754.3	768.4	755.8	770.2	-5.1	2.7	35	93	1
426	2020.10.31	5	9.4	769.7	774.3	771.4	776	-1.2	1.8	61	82	1
427	2020.10.30	9.4	12.2	750.7	767.9	752.2	769.6	-0.3	3.8	62	93	1
428	2020.10.29	11.7	16.7	745.9	758.3	747.5	760	-5.6	3.8	84	97	1
429	2020.10.28	16.7	20.6	759.6	763.4	761.1	764.9	-1.8	0.5	78	93	1
430	2020.10.27	14.4	18.3	763.4	765.9	765.1	767.5	-1.7	1.2	68	97	1
431	2020.10.26	8.9	16.7	762.6	764.9	764.3	766.6	-1.3	0.8	78	96	1
432	2020.10.25	8.3	13.9	763.1	766.4	764.6	768.1	-0.8	1.5	64	93	1
433	2020.10.24	16.1	25	758.5	762.6	760.3	764.2	-1.3	1.7	57	93	1
434	2020.10.23	17.2	23.9	761.6	765.4	763.1	767.1	-1.8	0.8	62	100	1
435	2020.10.22	16.7	26.1	764.9	766.7	766.4	768.4	-1	0.5	58	100	1
436	2020.10.21	17.2	23.9	765.1	767.7	766.9	769.2	-1.5	0.8	76	97	1
437	2020.10.20	15	23.9	765.1	766.9	766.7	768.5	-1	1.1	58	96	1
438	2020.10.19	14.4	21.1	766.7	768.7	768.2	770.4	-1	0.2	61	90	1
439	2020.10.18	7.8	18.3	768.7	771.5	770.4	773.2	-1.6	0.4	51	89	1
440	2020.10.17	7.8	17.2	765.9	770.8	767.5	772.5	-1	1	29	79	1
441	2020.10.16	12.8	18.9	759.8	765.1	761.4	766.8	-0.8	2.5	64	81	1
442	2020.10.15	14.4	23.9	758.1	761.4	759.7	762.8	-2.9	0.8	60	83	1
443	2020.10.14	10	22.8	760.6	762.6	762.1	764.2	-1.5	0.7	38	86	1
444	2020.10.13	13.3	22.2	758.1	760.3	759.8	761.9	-1.1	1.3	50	97	1
445	2020.10.12	15	18.9	759.1	760.3	760.6	762.1	-1.1	0.5	93	97	1
446	2020.10.11	18.9	21.1	760.3	762.1	762	763.7	-0.8	1.3	87	93	1
447	2020.10.10	16.1	22.2	760.3	763.6	762.1	765.2	-1.8	0.8	73	87	1
448	2020.10.09	10	21.1	764.4	767.2	766	768.8	-1.1	1	38	83	1
449	2020.10.08	14.4	21.1	758.1	765.4	759.7	766.9	-0.5	2	38	73	1
450	2020.10.07	13.9	26.7	753	759.1	754.7	760.6	-2.3	2	42	93	1
451	2020.10.06	10.6	21.7	760.1	765.4	761.8	767	-2.2	0.5	55	86	1
452	2020.10.05	13.9	20	762.9	765.9	764.4	767.4	-0.6	1.5	44	87	1
453	2020.10.04	10	20.6	763.1	767.5	764.7	769	-1.8	0.5	39	86	1
454	2020.10.03	10.6	19.4	764.9	767.5	766.4	769	-1.1	1	36	74	1
455	2020.10.02	13.9	19.4	760.3	764.4	761.9	765.9	-0.2	1.8	42	90	1
456	2020.10.01	14.4	23.9	757.8	760.1	759.4	761.8	-0.8	1.3	50	90	1
457	2020.09.30	13.3	21.1	750.2	757.8	751.6	759.4	-3	3.3	47	93	1
458	2020.09.29	13.9	25	753.2	756.5	754.8	758.2	-1.5	0.2	68	93	1
459	2020.09.28	20	26.7	756.5	758.1	758	759.7	-0.8	0.8	69	90	1
460	2020.09.27	20	23.9	757.8	760.3	759.4	761.9	-1.3	0.5	79	96	1
461	2020.09.26	17.2	22.2	759.8	762.4	761.5	763.9	-1.3	0.8	79	97	1
462	2020.09.25	17.2	19.4	761.6	764.2	763.2	765.7	-0.8	1.3	79	93	1
463	2020.09.24	16.1	21.7	760.1	761.8	761.5	763.5	-0.5	0.8	61	93	1
464	2020.09.23	15	26.7	758.8	761.4	760.4	763	-1.6	0.8	37	68	1
465	2020.09.22	8.9	22	760.6	769.2	762.3	770.9	-2.8	-0.5	34	83	1
466	2020.09.21	10	19.4	770.5	774.8	772	776.5	-1.5	1	36	77	1
467	2020.09.20	8.9	19.4	770.2	773.5	771.8	775.2	-0.8	1.2	37	83	1
468	2020.09.19	10.6	18.9	766.2	769.7	767.8	771.4	-1	2	30	65	1
469	2020.09.18	17.8	23.3	757.6	764.2	759.1	765.7	-0.7	2.6	48	96	1
470	2020.09.17	19.4	22.8	758.8	762.6	760.6	764.2	-1.3	0.2	68	93	1
471	2020.09.16	13.3	23	763.4	767.2	765	768.8	-1.5	0.5	53	88	1
472	2020.09.15	13.3	21	767.5	769.7	769	771.4	-1.3	1.1	40	72	1
473	2020.09.14	19.4	25.6	761.8	766.7	763.3	768.2	-0.5	1.8	48	85	1
474	2020.09.13	17.8	26.7	761.1	765.4	762.7	767.1	-1.8	0.7	62	84	1
475	2020.09.12	19.4	23.3	765.1	766.9	766.7	768.4	-1.6	1.1	64	87	1
476	2020.09.11	23.9	26.7	762.9	765.4	764.5	767.1	-0.7	1.3	71	94	1
477	2020.09.10	24.4	26.1	763.4	766.2	765	767.9	-1	0.2	88	96	1
478	2020.09.09	22.8	25.6	765.1	766.9	766.7	768.7	-1	1.1	84	94	1
479	2020.09.08	20	29.4	761.6	764.4	763.1	766	-1	1.2	55	87	1
480	2020.09.07	18.9	27.8	760.3	763.4	762.1	765	-1.5	1.5	49	87	1
481	2020.09.06	17.8	27.8	763.6	766.4	765.1	768	-1.5	0.7	47	81	1
482	2020.09.05	18.9	27.2	763.4	767.2	765	768.7	-1	1.6	35	73	1
483	2020.09.04	23.3	32.2	756.3	761.8	757.9	763.4	-0.6	2	45	88	1
484	2020.09.03	25	32.2	753	757.3	754.5	758.9	-2.5	1	62	94	1
485	2020.09.02	23.9	30	755.2	760.3	757	762	-1.6	1.1	72	91	1
486	2020.09.01	20.6	27.2	760.6	762.4	762.3	763.9	-1	0.8	62	90	1
487	2020.08.31	20.6	24.4	759.3	762.4	761	763.9	-0.2	1.3	62	87	1
488	2020.08.30	21.1	28.3	753.2	758.8	754.9	760.3	0	1.7	44	73	1
489	2020.08.29	22.8	29.4	748.6	754.8	750.4	756.3	-1.6	2.2	60	94	1
490	2020.08.28	24.4	33.3	755.8	758.1	757.5	759.8	-1.8	1.2	52	91	1
491	2020.08.27	23.9	33.3	755	758.8	756.5	760.4	-1.6	0.8	52	82	1
492	2020.08.26	23.3	30.6	759.1	761.8	760.8	763.3	-1.3	1.6	43	71	1
493	2020.08.25	23.3	32.2	756.5	760.1	758.1	761.7	-1.6	1.8	51	94	1
494	2020.08.24	25	28.9	760.1	762.4	761.6	763.9	-1.3	1	67	88	1
495	2020.08.23	24.4	31.1	760.3	762.1	762	763.7	-1.1	0.6	61	94	1
496	2020.08.22	23.9	27.8	759.1	760.9	760.6	762.5	-0.5	1.1	67	88	1
497	2020.08.21	21.1	28.3	758.8	761.1	760.3	762.7	-1.3	0.8	63	90	1
498	2020.08.20	20.6	27.8	759.8	762.4	761.5	764.1	-1.5	1.3	54	87	1
499	2020.08.19	20.6	28.9	757.8	760.1	759.4	761.8	-0.8	1.6	49	87	1
500	2020.08.18	20.6	28.9	756.8	758.5	758.5	760.1	-1.3	1.1	49	90	1
501	2020.08.17	18.9	27.2	757	759.8	758.6	761.5	-1.5	0.6	65	93	1
502	2020.08.16	18.9	23.9	758.3	759.3	760	760.8	-0.8	0.6	74	93	1
503	2020.08.15	23.3	26.1	759.1	760.1	760.7	761.7	-0.7	0.5	62	85	1
504	2020.08.14	24.4	30	758.5	760.6	760.3	762.2	-1	1.3	61	91	1
505	2020.08.13	23.9	28.3	760.9	762.9	762.4	764.4	-1.1	0.8	72	94	1
506	2020.08.12	24.4	31.7	759.8	761.8	761.4	763.3	-1.1	1.5	65	91	1
507	2020.08.11	25	31.7	758.3	760.1	759.9	761.8	-1	0.8	59	90	1
508	2020.08.10	24.4	32.8	759.6	762.4	761.1	764	-1	0.5	50	94	1
509	2020.08.09	23.9	30.6	761.8	764.4	763.6	766	-1.3	0.5	61	91	1
510	2020.08.08	22.8	29.4	763.1	764.6	764.6	766.3	-1	1.1	61	90	1
511	2020.08.07	23.3	30	761.1	763.4	762.6	765.1	-1.3	1.8	63	91	1
512	2020.08.06	23.3	30	761.4	762.6	763	764.4	-0.7	0.8	63	88	1
513	2020.08.05	22.8	30.6	759.8	762.4	761.3	764	-0.7	1.3	45	91	1
514	2020.08.04	21.1	30.6	753	759.8	754.6	761.5	-4.6	2.3	50	94	1
515	2020.08.03	23.3	29.4	759.8	762.4	761.4	763.9	-1.5	1.2	49	91	1
516	2020.08.02	26.1	32.8	756.8	758.8	758.5	760.4	-0.8	1.5	52	88	1
517	2020.08.01	24.4	30.6	757	759.6	758.7	761.2	-1.2	1.8	61	88	1
518	2020.07.31	23.9	26.7	754.8	757	756.4	758.8	-1	1.2	74	94	1
519	2020.07.30	24.4	33.9	755.2	758.1	757	759.7	-1.6	2.1	45	91	1
520	2020.07.29	24.4	32.8	757.6	759.8	759.2	761.5	-1.7	0.8	33	88	1
521	2020.07.28	26.7	32.2	755.8	758.3	757.4	760	-0.8	1.3	52	82	1
522	2020.07.27	26.1	35	756.1	759.8	757.6	761.3	-1.8	1	41	74	1
523	2020.07.26	26.1	34.4	759.3	762.6	760.9	764.2	-1	0.3	36	88	1
524	2020.07.25	23.9	32.2	761.6	763.6	763.3	765.2	-1.3	1.3	57	88	1
525	2020.07.24	23.3	28.9	761.6	763.1	763.1	764.7	-1	0.8	67	94	1
526	2020.07.23	23.9	33.3	760.3	762.9	761.9	764.4	-1.5	1.5	54	90	1
527	2020.07.22	23.3	32.8	760.3	761.8	762.1	763.5	-1.5	0.8	61	94	1
528	2020.07.21	25	35.6	759.3	761.4	760.9	763	-1	1.3	43	88	1
529	2020.07.20	26.7	35.6	756.8	758.8	758.3	760.4	-1.5	1.3	44	79	1
530	2020.07.19	26.7	36.1	756.8	760.3	758.5	762	-1.5	1	43	82	1
531	2020.07.18	27.2	36.1	760.3	763.1	762	764.7	-1.5	1.1	29	77	1
532	2020.07.17	24.4	35	761.4	764.2	762.9	765.9	-1.2	0.7	43	85	1
533	2020.07.16	24.4	30	764.4	766.2	766	767.8	-1.1	1.7	59	88	1
534	2020.07.15	23.3	32.2	762.4	764.2	764	765.7	-0.5	0.8	35	79	1
535	2020.07.14	23.3	31.7	758.5	762.1	760.2	763.8	-0.3	1.2	30	85	1
536	2020.07.13	22.2	32.2	755.2	758.3	756.9	759.9	-0.7	1.5	37	84	1
537	2020.07.12	24.4	31.7	753.5	755.5	755.1	757.1	-1	1.2	45	77	1
538	2020.07.11	25	32.8	752.8	754.8	754.5	756.5	-0.5	1.2	38	79	1
539	2020.07.10	25	32.2	753.7	758.5	755.4	760.3	-1.6	0.4	54	85	1
540	2020.07.09	24.4	31.7	758.1	760.1	759.7	761.7	-0.8	1	53	91	1
541	2020.07.08	25	32.8	758.3	760.9	760	762.4	-1.3	1.1	49	90	1
542	2020.07.07	22.2	32.2	760.1	762.4	761.7	763.9	-1.7	1.3	58	91	1
543	2020.07.06	23.9	34.4	759.3	762.4	761.1	764	-1.3	2.1	52	87	1
544	2020.07.05	25	32.8	758.5	760.3	760.2	762	-1.3	0.8	56	88	1
545	2020.07.04	26.1	33.9	757	758.8	758.8	760.3	-0.2	1	42	67	1
546	2020.07.03	25	35.6	756.1	758.1	757.7	759.7	-1.1	0.8	36	62	1
547	2020.07.02	22.2	33.3	756.8	758.1	758.5	759.6	-0.8	0.8	37	82	1
548	2020.07.01	22.8	29.4	756.1	757.8	757.6	759.4	-1	1.1	55	84	1
549	2020.06.30	23.9	32.2	756.5	758.5	758	760.2	-1	1.1	34	69	1
550	2020.06.29	24.4	33.3	754.8	757.6	756.4	759.3	-0.8	2.1	36	74	1
551	2020.06.28	25	31.7	753.7	755.8	755.3	757.3	-1.5	0.8	50	74	1
552	2020.06.27	23.9	32.8	754.5	758.5	756.1	760.3	-1.6	0.3	44	90	1
553	2020.06.26	20.6	31.7	759.1	762.1	760.7	763.7	-1.3	1	33	73	1
554	2020.06.25	22.2	28.9	758.1	760.3	759.8	762	-0.7	1.3	43	74	1
555	2020.06.24	24.4	29.4	752.2	757.3	753.9	758.9	-0.2	2.3	36	74	1
556	2020.06.23	21.7	30	751.9	757.3	753.6	758.8	-1.8	0.3	59	90	1
557	2020.06.22	21.7	31.1	757	760.1	758.5	761.7	-1.3	1.5	59	90	1
558	2020.06.21	21.7	28.3	759.1	761.1	760.6	762.7	-1	0.8	63	91	1
559	2020.06.20	20.6	24.4	760.6	762.1	762.1	763.7	-0.7	0.3	77	91	1
560	2020.06.19	20.6	27.8	761.6	763.6	763.2	765.1	-1.3	0.8	60	90	1
561	2020.06.18	20	27.2	762.1	763.4	763.7	765.1	-1	1.3	57	93	1
562	2020.06.17	18.3	21.7	763.1	765.7	764.6	767.2	-1.2	0.8	73	93	1
563	2020.06.16	18.3	25	766.4	769.2	768	770.8	-1.5	0.5	43	66	1
564	2020.06.15	17.2	25	768.2	769.9	769.9	771.5	-0.9	1.3	42	73	1
565	2020.06.14	17.8	25.6	766.7	769.5	768.2	771	-1.3	1.8	39	58	1
566	2020.06.13	19.4	26.1	763.6	766.2	765.2	767.8	-0.6	1.3	40	51	1
567	2020.06.12	21.7	30	761.8	764.6	763.6	766.3	-1.2	1.1	32	59	1
568	2020.06.11	25	28.9	758.5	763.1	760.3	764.7	-0.3	1.3	48	90	1
569	2020.06.10	24.4	31.7	757.6	759.1	759.1	760.6	-0.8	0.9	61	85	1
570	2020.06.09	20	31.1	758.1	760.6	759.7	762.3	-1	1	61	79	1
571	2020.06.08	18.9	27.8	760.1	762.9	761.7	764.4	-1.2	1.3	32	68	1
572	2020.06.07	20.6	27.2	756.8	760.3	758.4	761.9	-1.3	1.5	36	57	1
573	2020.06.06	22.2	32.2	755	757.3	756.5	758.8	-1.3	1.3	37	94	1
574	2020.06.05	21.7	30	756.1	759.1	757.6	760.6	-1.2	2.1	55	94	1
575	2020.06.04	23.3	32.8	755.2	758.1	757	759.8	-1.5	1.5	45	85	1
576	2020.06.03	20.6	32.8	752.5	755.8	754	757.3	-1.3	1.3	39	84	1
577	2020.06.02	14.4	24.4	757	764.6	758.5	766.1	-2.4	0	46	71	1
578	2020.06.01	13.9	23.3	764.4	769	766	770.4	-1.7	1.5	29	51	1
579	2020.05.31	17.2	23.9	761.1	764.9	762.7	766.4	-0.8	1.8	30	49	1
580	2020.05.30	20.6	28.3	758.5	760.3	760.2	761.8	-0.8	1.8	30	87	1
581	2020.05.29	23.3	29.4	758.1	761.4	759.7	763	-1.3	0.3	65	91	1
582	2020.05.28	22.2	26.1	760.6	763.6	762.1	765.4	-1	0.5	82	91	1
583	2020.05.27	18.9	26.1	763.9	765.7	765.4	767.4	-1.2	0.6	60	91	1
584	2020.05.26	17.2	26.1	764.4	766.2	766	767.8	-1	0.8	62	90	1
585	2020.05.25	16.7	25.6	763.9	766.2	765.6	767.8	-1.8	1	56	84	1
586	2020.05.24	15.6	20.6	762.6	766.2	764.2	767.7	-0.6	1.5	73	93	1
587	2020.05.23	18.3	27.8	759.6	761.4	761.2	762.8	-0.6	1.3	46	93	1
588	2020.05.22	15.6	24.4	759.8	765.1	761.5	766.6	-1.6	0.3	74	96	1
589	2020.05.21	10.6	21.7	765.9	769.5	767.5	771.1	-2	0.5	57	80	1
590	2020.05.20	11.7	17.8	766.9	769.5	768.5	771.1	-0.6	1.3	44	74	1
591	2020.05.19	14.4	20.6	761.8	767.5	763.3	769	0.2	1.3	30	69	1
592	2020.05.18	13.9	20	759.6	762.6	761.2	764.2	-1.3	1.3	51	90	1
593	2020.05.17	16.1	20	763.6	765.7	765.3	767.2	-1.5	0.8	68	78	1
594	2020.05.16	19.4	27.2	758.8	764.2	760.5	765.6	-0.3	2.1	37	79	1
595	2020.05.15	17.2	29.4	757.6	762.6	759.1	764.2	-2	1.5	38	90	1
596	2020.05.14	11.1	20.6	762.6	768.2	764.2	769.9	-2	0.5	57	87	1
597	2020.05.13	7.8	21.1	766.4	769.2	768.1	770.8	-1.5	1.7	25	74	1
598	2020.05.12	6.7	17.2	763.4	766.2	764.9	767.8	-1.2	1.6	26	63	0
599	2020.05.11	9.4	15.6	757.8	763.4	759.5	765	-1.7	1.8	36	75	1
600	2020.05.10	3.9	17.8	759.8	766.9	761.4	768.6	-2.8	0.7	30	60	0
601	2020.05.09	3.3	10	758.1	766.2	759.7	767.8	-0.7	3.1	30	55	0
602	2020.05.08	6.7	19.4	750.4	757	752.1	758.6	-2	4.6	37	81	1
603	2020.05.07	7.2	20	756.3	758.8	758	760.5	-1.5	1.1	22	86	1
604	2020.05.06	8.9	13.9	753.7	756.8	755.3	758.4	-1.6	1.2	59	93	1
605	2020.05.05	10	14.4	757.3	760.9	758.8	762.4	-1.6	1	41	89	1
606	2020.05.04	14.4	23.9	752.5	759.6	754	761.2	-1	2.5	24	97	1
607	2020.05.03	15.6	25	753.5	757.8	754.9	759.4	-2	0.5	58	93	1
608	2020.05.02	11.7	22.2	759.6	764.2	761.1	765.8	-2	2.3	33	72	1
609	2020.05.01	12.2	18.3	752.8	758.5	754.3	760.2	-0.9	1.7	46	93	1
610	2020.04.30	14.4	19.4	752.2	757.8	753.7	759.5	-1.5	0.9	68	97	1
611	2020.04.29	8.9	22.8	758.5	762.9	760.2	764.5	-1.1	0.3	55	89	1
612	2020.04.28	7.2	12.2	763.1	765.9	764.8	767.5	-1.5	0.5	64	86	1
613	2020.04.27	7.2	15	755.8	764.2	757.4	765.7	0.6	1.8	49	93	1
614	2020.04.26	10	13.9	752.8	759.1	754.3	760.7	-2.1	1.6	83	96	1
615	2020.04.25	9.4	17.2	758.8	762.4	760.5	763.9	-1.3	1.3	60	93	1
616	2020.04.24	11.1	15	751	757.8	752.6	759.4	-2.6	2.3	74	97	1
617	2020.04.23	10	15	755.8	761.6	757.4	763.2	-1.5	0.3	43	97	1
618	2020.04.22	4.4	16.1	758.1	761.8	759.6	763.6	-1.5	2.3	19	51	0
619	2020.04.21	8.9	18.9	748.2	756.1	749.9	757.7	-1.5	3.9	23	86	1
620	2020.04.20	11.7	16.7	751	753.2	752.5	754.8	-1.5	1.5	48	80	1
621	2020.04.19	4.4	18.9	753.7	761.1	755.2	762.8	-2.5	1	36	74	1
622	2020.04.18	8.3	12.8	754.3	760.3	755.8	761.9	-1.8	1.5	39	90	1
623	2020.04.17	5.6	13.9	757.3	769.5	759	771.1	-3.5	1.1	40	77	1
624	2020.04.16	6.1	12.2	761.6	767.5	763.3	769.2	-0.8	1.8	26	63	0
625	2020.04.15	3.9	11.7	759.8	763.1	761.4	764.8	-1.3	1	32	89	0
626	2020.04.14	6.1	14.4	760.3	764.4	761.9	766	-2	2.6	37	86	1
627	2020.04.13	15	26.1	745.9	759.3	747.5	761	-3.3	4.9	42	97	1
628	2020.04.12	7.8	21.7	759.8	764.2	761.4	765.7	-2.4	1	44	83	1
629	2020.04.11	5	16.7	759.1	761.8	760.7	763.4	-1	1.5	28	56	0
630	2020.04.10	6.7	10	749.7	758.3	751.3	759.8	0	2.2	33	40	0
631	2020.04.09	10	21.7	743.6	749.7	745	751.3	-2.6	2.6	33	90	1
632	2020.04.08	13.9	25.6	749.7	751	751.4	752.5	-2.5	1	37	96	1
633	2020.04.07	12.2	21.7	753.2	760.9	754.9	762.4	-2.1	0	53	93	1
634	2020.04.06	14.4	21.7	760.1	762.6	761.6	764.2	-1.7	1.5	23	81	1
635	2020.04.05	8.9	19.4	760.6	763.1	762.2	764.8	-1.5	0.8	51	93	1
636	2020.04.04	10	15	758.8	762.4	760.4	763.9	-0.5	1.5	56	74	1
637	2020.04.03	9.4	19.4	754.8	758.5	756.3	760.1	-0.8	2	31	57	0
638	2020.04.02	6.7	17.2	755.2	758.8	756.8	760.6	-1.8	1.3	30	47	0
639	2020.04.01	6.1	13.3	754.8	756.8	756.4	758.4	-1.1	1.5	53	82	1
640	2020.03.31	7.2	12.8	756.8	760.6	758.3	762.2	-1.7	1	53	93	1
641	2020.03.30	12.2	21.7	755.8	760.6	757.3	762.3	-2.6	2.3	27	100	1
642	2020.03.29	10.6	19.4	754.5	760.3	756.1	761.8	-3.5	2	71	97	1
643	2020.03.28	11.1	15	758.1	761.1	759.7	762.8	-1.7	1.7	83	93	1
644	2020.03.27	11.7	20	755.2	761.1	756.8	762.6	-0.9	1.6	51	83	1
645	2020.03.26	7.8	14.4	756.5	763.4	758.1	765.1	-2.9	0.8	60	86	1
646	2020.03.25	7.2	10	758.8	762.6	760.3	764.2	-2.3	1.8	80	93	1
647	2020.03.24	7.2	12.8	762.6	765.7	764.3	767.4	-2	1.5	55	90	1
648	2020.03.23	5.6	7.8	761.8	773.5	763.5	775	-3.5	0.8	79	93	1
649	2020.03.22	4.4	11.1	771.7	775.6	773.3	777.1	-1	2.2	39	71	0
650	2020.03.21	9.4	20.6	761.6	771	763.1	772.6	-0.8	2.8	45	84	1
651	2020.03.20	14.4	27.8	757.3	762.4	759	763.9	-2	1.3	42	93	1
652	2020.03.19	10	23.3	763.9	766.7	765.4	768.3	-2.5	0.8	57	96	1
653	2020.03.18	7.2	13.9	769.2	773.2	770.8	774.8	-2.1	1.8	44	72	1
654	2020.03.17	7.2	16.7	763.1	768.2	764.7	769.9	-2	3.1	58	83	1
655	2020.03.16	3.9	12.8	769.7	774.3	771.3	775.8	-2.1	1	40	89	1
656	2020.03.15	5	10	770.5	772.8	772	774.3	-0.5	1.3	54	93	1
657	2020.03.14	7.2	13.9	766.7	771.2	768.1	772.8	-1	1.8	23	83	0
658	2020.03.13	10.6	23.3	755	764.9	756.7	766.4	-3.8	3.3	19	97	1
659	2020.03.12	8.9	17.2	760.1	763.4	761.8	765	-1.5	1.3	54	77	1
660	2020.03.11	8.3	13.3	761.6	764.4	763.2	766	-1.5	1	55	77	1
661	2020.03.10	12.2	21.7	759.8	767.5	761.5	769	-2.6	2.1	47	75	1
662	2020.03.09	6.7	23.3	767.7	771.7	769.3	773.3	-2	0.7	16	58	0
663	2020.03.08	3.3	16	771.2	775	772.9	776.7	-2.3	1	15	55	0
664	2020.03.07	4.4	11.1	761.4	772	762.8	773.7	0	3.3	22	58	0
665	2020.03.06	3.9	10.6	755.5	760.6	757.2	762.3	-3.3	2.3	48	79	1
666	2020.03.05	5.6	12.2	760.3	765.4	761.8	767.1	-1.5	2.2	34	54	0
667	2020.03.04	9.4	18.3	754.5	758.3	756.1	760	-1.3	3.3	22	53	0
668	2020.03.03	7.8	18.3	748.2	756.3	749.8	757.9	-3.3	3	55	97	1
669	2020.03.02	4.4	17.8	755.8	763.1	757.6	764.8	-3.1	0.3	29	60	0
670	2020.03.01	-2.2	10	764.6	767.9	766.2	769.6	-1.5	1.3	25	63	0
671	2020.02.29	0	2.8	758.8	764.4	760.3	765.9	-0.3	1.8	34	49	0
672	2020.02.28	-0.6	8.3	756.5	760.3	758.1	762	-1.2	1.2	40	54	0
673	2020.02.27	1.1	7.2	749.5	760.6	751	762.1	-0.2	2.7	32	85	0
674	2020.02.26	8.3	11.1	749.7	758.8	751.2	760.4	-2.8	1.2	86	97	1
675	2020.02.25	8.3	12.2	755	758.3	756.6	759.8	-1.3	1.3	83	97	1
676	2020.02.24	2.8	15	759.1	762.4	760.7	764.1	-1.5	0.5	36	76	1
677	2020.02.23	-1.1	13.9	763.1	767.7	764.8	769.3	-2.1	1	14	73	0
678	2020.02.22	-2.8	11.1	767.2	771.2	768.7	772.9	-2.2	0.7	26	49	0
679	2020.02.21	-4.4	3.9	772	775	773.7	776.6	-1.3	1.8	29	52	0
680	2020.02.20	1.1	4.4	770.2	773	772	774.5	-1.8	1	35	67	0
681	2020.02.19	6.7	12.2	762.6	771.2	764.2	772.9	-0.5	2.5	24	72	0
682	2020.02.18	5.6	13.3	760.6	767.7	762.2	769.2	-2.8	1.2	62	82	1
683	2020.02.17	3.3	12.2	763.6	767.9	765.1	769.6	-1.1	2.3	34	89	0
684	2020.02.16	0.6	11.1	762.6	768.4	764.2	770.2	-1.8	0.3	43	76	0
685	2020.02.15	-5.6	2.2	769.9	777.6	771.7	779.1	-2.8	1.1	42	58	0
686	2020.02.14	-2.2	6.1	762.4	775	763.9	776.7	0.7	3.1	37	60	0
687	2020.02.13	5.6	13.3	750.7	760.6	752.4	762.3	-3.6	4.3	56	96	1
688	2020.02.12	5.6	9.4	760.9	767.5	762.4	769.1	-3	2.5	41	89	0
689	2020.02.11	9.4	13.9	756.5	761.8	758.2	763.6	-2.2	1.8	71	100	1
690	2020.02.10	6.7	8.9	763.4	768.2	765.1	769.8	-2.3	0.6	56	96	1
691	2020.02.09	0.6	10	769.2	774.1	770.9	775.6	-1.5	1.8	35	78	0
692	2020.02.08	0	6.7	760.3	768.4	762	770.1	-0.8	3.3	38	62	0
693	2020.02.07	3.3	13.3	735.2	757	736.7	758.7	-4.4	5.7	39	100	1
694	2020.02.06	3.9	7.2	745.4	757.6	746.9	759.1	-3.8	1.7	93	100	1
695	2020.02.05	3.9	13.3	754.8	762.4	756.4	763.9	-1.3	3.3	76	93	1
696	2020.02.04	10	16.7	755	757.6	756.5	759.1	-1.8	1.6	55	80	1
697	2020.02.03	6.7	16.1	751	759.1	752.5	760.6	-1.1	3.3	39	73	1
698	2020.02.02	2.2	11.1	747.1	754	748.6	755.7	-3.9	1	45	100	1
699	2020.02.01	1.7	10	754.8	763.4	756.3	764.9	-3.1	0.2	59	93	1
700	2020.01.31	1.7	7.8	764.9	768.7	766.4	770.4	-2	0.3	54	79	0
701	2020.01.30	-0.6	5.6	765.7	768.7	767.2	770.2	-0.5	1.3	41	62	0
702	2020.01.29	2.2	7.8	761.4	764.9	762.9	766.5	-0.8	1.6	42	62	0
703	2020.01.28	5	7.8	757	760.9	758.5	762.5	-1.1	1.8	49	62	0
704	2020.01.27	2.2	9.4	754.5	756.8	756.2	758.3	-1.3	1.3	46	76	0
705	2020.01.26	2.2	8.9	757	758.5	758.8	760.2	-0.9	0.8	48	79	0
706	2020.01.25	6.7	10.6	756.5	759.8	758.2	761.5	-2.8	0.8	69	96	1
707	2020.01.24	1.1	10.6	762.6	769	764.1	770.5	-2	0.3	68	80	1
708	2020.01.23	-1.7	6.7	769	771.7	770.7	773.2	-1.8	0.5	43	82	0
709	2020.01.22	-4.4	3.9	771.5	774.1	773	775.6	-1.6	1	39	68	0
710	2020.01.21	-5	2.8	771.5	774.5	773.1	776.2	-1.7	1.3	40	57	0
711	2020.01.20	-3.9	1.7	765.4	771.7	766.9	773.4	-0.6	2.3	34	58	0
712	2020.01.19	-0.6	6.7	753.7	764.6	755.3	766.2	-2.8	2.3	43	92	0
713	2020.01.18	-2.8	3.9	757.3	777.6	759	779.2	-5.3	-0.7	45	89	0
714	2020.01.17	-0.6	3.3	772	778.9	773.7	780.5	-0.3	3	34	59	0
715	2020.01.16	3.9	13.3	757.8	769.9	759.3	771.6	-3	3.6	31	93	0
716	2020.01.15	7.8	12.2	762.1	767.2	763.7	768.7	-2.3	1.3	67	97	1
717	2020.01.14	6.7	9.4	763.1	769.2	764.8	770.8	-2.4	0.8	86	96	1
718	2020.01.13	7.2	11.7	769	770.2	770.5	772	-1	0.7	64	90	1
719	2020.01.12	10.6	20.6	757.3	769.7	758.9	771.2	-1.8	4.8	41	91	1
720	2020.01.11	8.9	22.2	759.8	770.2	761.5	771.8	-2.8	0	61	89	1
721	2020.01.10	1.7	12.2	771	776.5	772.7	778.2	-2.3	0.5	66	79	1
722	2020.01.09	-1.1	5	774.1	780.4	775.6	782.1	-1.3	2.3	37	59	0
723	2020.01.08	-0.6	7.8	761.1	772	762.7	773.7	0	3.8	27	92	0
724	2020.01.07	1.1	7.8	757.8	763.9	759.2	765.4	-3.8	1.8	47	97	0
725	2020.01.06	2.2	12.2	760.1	764.2	761.7	765.6	-0.8	1.6	24	73	0
726	2020.01.05	2.2	7.2	754.5	762.6	756	764.2	-1.3	3	45	70	0
727	2020.01.04	9.4	14.4	749.2	754.5	750.7	756	-2.6	2	69	100	1
728	2020.01.03	8.9	11.1	755.2	757	756.9	758.6	-1.6	1	59	100	1
729	2020.01.02	0.6	11.7	757.3	761.1	759	762.6	-2.3	0.8	45	83	0
730	2020.01.01	4.4	10.6	754.3	759.3	755.9	760.8	-1	1.5	31	55	0
731	2019.12.31	6.7	11.7	752.2	754.3	753.8	755.9	-1.5	0.8	41	93	1
732	2019.12.30	8.3	17.2	750.2	754.8	751.8	756.4	-2.8	2.4	78	100	1
733	2019.12.29	7.2	11.1	757.6	765.7	759.1	767.2	-2.7	0.2	83	100	1
734	2019.12.28	3.9	19.4	765.1	767.5	766.7	769	-1.6	1.3	47	100	1
735	2019.12.27	3.3	12.2	765.1	768.4	766.6	770.2	-2.7	0.6	75	100	1
736	2019.12.26	0.6	11.1	764.2	769	765.8	770.5	-1	1.5	59	96	1
737	2019.12.25	0	8.9	764.2	766.4	765.7	768.1	-1.5	0.5	52	92	0
738	2019.12.24	1.7	11.1	760.9	764.9	762.5	766.5	-0.7	1.8	53	89	1
739	2019.12.23	-0.6	10	761.6	766.7	763.3	768.4	-2	0	48	92	0
740	2019.12.22	-2.8	7.8	767.7	772.3	769.3	773.7	-1.8	0.3	54	92	0
741	2019.12.21	-1.1	3.3	773	776.5	774.5	778.2	-2	0.2	55	75	0
742	2019.12.20	-3.9	5.6	772.3	776.5	773.9	778.1	-0.8	1.3	43	75	0
743	2019.12.19	-5	1.1	767.5	773.5	768.9	775	-1.5	2.9	35	55	0
744	2019.12.18	0	6.1	757.8	764.6	759.4	766.3	-1.3	1.8	38	65	0
745	2019.12.17	2.8	5	752.2	762.4	753.8	763.9	-3.3	2	67	100	1
746	2019.12.16	1.7	4.4	762.9	767.5	764.4	769	-2.1	1	53	97	1
747	2019.12.15	4.4	13.3	752.8	766.2	754.3	767.8	0.6	2.8	39	71	0
748	2019.12.14	5.6	9.4	743.8	753.5	745.5	755.2	-4.1	3.5	56	97	1
749	2019.12.13	1.1	5.6	757.6	773.5	759.3	775.1	-3.3	-1.3	70	96	1
750	2019.12.12	-1.1	3.9	775.6	779.6	777.1	781.3	-1.5	1.5	41	59	0
751	2019.12.11	1.1	5.6	765.4	774.3	767	776	-0.9	2.1	38	89	0
752	2019.12.10	6.7	15	755.5	763.9	757.1	765.5	-0.6	2.9	79	93	1
753	2019.12.09	7.2	10.6	756.1	767.2	757.6	768.7	-2.8	-0.3	86	97	1
754	2019.12.08	-0.6	7.8	769	774.1	770.6	775.6	-2.1	0.3	56	85	0
755	2019.12.07	1.1	7.8	766.2	773	767.7	774.5	-0.7	2	40	59	0
756	2019.12.06	2.2	11.1	761.4	765.1	763.1	766.9	-2.5	1.6	43	79	0
757	2019.12.05	4.4	8.3	751.7	764.6	753.4	766.1	0	3	37	73	0
758	2019.12.04	2.8	9.4	748.4	751.9	750.1	753.6	-2.8	2.3	48	89	0
759	2019.12.03	3.9	8.9	752.8	754.3	754.3	755.8	-1.3	1.1	48	70	0
760	2019.12.02	4.4	6.1	749.2	752.2	750.7	753.7	0	1.1	71	89	1
761	2019.12.01	4.4	7.2	747.7	759.8	749.1	761.5	-4.6	0.9	60	93	1
762	2019.11.30	5	7.2	760.3	764.2	762.1	765.6	-2.3	1	42	60	0
763	2019.11.29	3.3	10.6	764.4	767.7	766.1	769.3	-1.8	0.3	36	70	0
764	2019.11.28	6.7	11.7	756.5	766.9	758	768.6	0.5	2.5	40	60	0
765	2019.11.27	7.8	14.4	751.9	760.9	753.7	762.5	-3.8	2.6	72	89	1
766	2019.11.26	3.3	15.6	758.8	761.8	760.5	763.5	-0.9	1.3	47	93	1
767	2019.11.25	2.8	12.8	754.5	759.1	756.1	760.6	-1	1.3	49	89	1
768	2019.11.24	5	11.1	746.9	753.7	748.4	755.3	-4.3	2.3	38	93	1
769	2019.11.23	2.8	6.7	753.2	763.1	754.7	764.6	-2.6	0.5	57	93	0
770	2019.11.22	6.1	12.8	755.8	762.4	757.3	763.9	-1.8	3	50	93	1
771	2019.11.21	4.4	11.1	761.6	767.9	763.3	769.6	-2.5	1	49	70	1
772	2019.11.20	8.9	12.2	757.6	765.9	759.1	767.6	-0.3	2	49	66	1
773	2019.11.19	6.7	12.2	754.5	757.3	756.1	759	-0.7	1.3	52	96	1
774	2019.11.18	5	7.8	754.3	759.8	755.8	761.3	-2.1	0.5	77	93	1
775	2019.11.17	2.8	7.2	761.4	769	762.9	770.5	-2.6	-0.2	34	76	0
776	2019.11.16	2.8	7.8	766.7	769.9	768.2	771.7	-0.7	1.7	32	68	0
777	2019.11.15	2.2	12.2	765.1	767.9	766.9	769.6	-1.7	0.6	34	76	0
778	2019.11.14	-2.2	5.6	769	771.5	770.5	773	-1.8	0.4	43	72	0
779	2019.11.13	-3.3	2.8	768.2	772.3	769.7	773.8	-1.3	1.6	36	57	0
780	2019.11.12	0	15.6	754.5	766.9	756.1	768.4	-1.7	3.3	50	80	0
781	2019.11.11	5.6	17.8	756.5	762.6	758.2	764.2	-2.1	0.8	46	90	1
782	2019.11.10	2.8	12.8	761.4	764.4	763	766	-1.8	0.3	51	79	1
783	2019.11.09	-0.6	7.2	765.1	769.7	766.7	771.4	-2.3	0.2	42	69	0
784	2019.11.08	2.8	7.2	763.4	770.2	764.9	771.8	-0.5	2	40	68	0
785	2019.11.07	7.8	16.1	760.6	769	762.4	770.7	-3.3	1.2	61	87	1
786	2019.11.06	7.2	14.4	767.7	772.5	769.3	774.2	-1.5	2	35	73	1
787	2019.11.05	7.2	17.2	764.4	766.4	766	768.1	-1	1.3	45	93	1
788	2019.11.04	3.9	15.6	766.7	769.7	768.2	771.4	-2	0.7	41	86	1
789	2019.11.03	6.1	13.3	763.6	767.5	765.2	769.2	-1	1.5	29	74	0
790	2019.11.02	3.3	12.2	762.6	767.7	764.3	769.4	-2.8	0.5	42	76	0
791	2019.11.01	6.7	11.7	757	768.2	758.7	769.8	0.3	5.1	41	58	0
792	2019.10.31	15.6	25	748.9	761.1	750.4	762.6	-2.8	3	74	100	1
793	2019.10.30	15.6	18.9	762.9	767.2	764.5	768.9	-1.8	0.5	70	97	1
794	2019.10.29	15	20	766.4	767.7	768	769.2	-1	0.8	59	90	1
795	2019.10.28	14.4	19.4	761.4	766.2	762.8	767.8	-0.8	2.1	51	84	1
796	2019.10.27	16.1	25.6	754.5	761.8	756.1	763.3	-3.3	2.9	50	97	1
797	2019.10.26	15	18.9	763.6	766.4	765.4	767.9	-1.3	0.7	52	84	1
798	2019.10.25	10.6	19.4	765.1	768.2	766.7	769.7	-1.5	0.6	57	100	1
799	2019.10.24	7.2	20	766.7	769.5	768.4	770.4	-1.6	1	33	93	1
800	2019.10.23	11.1	19.4	757.3	766.2	758.8	768.4	-0.3	2.1	32	97	1
801	2019.10.22	14.4	17.2	756.1	762.4	757.6	763.9	-3.3	1.2	84	96	1
802	2019.10.21	12.8	20	760.3	763.4	761.9	765	-1.3	1.3	53	90	1
803	2019.10.20	12.8	14.4	756.8	760.3	758.4	762	-2.3	1.3	78	97	1
804	2019.10.19	7.8	18.3	760.9	763.6	762.6	765.3	-1.2	1	42	83	1
805	2019.10.18	8.9	17.8	756.8	762.1	758.4	763.6	-0.2	2	34	61	1
806	2019.10.17	10	15	749.9	756.5	751.5	758.1	0	1.5	42	63	1
807	2019.10.16	12.2	18.3	747.9	760.1	749.5	761.7	-3.6	1.3	55	96	1
808	2019.10.15	11.7	22.2	761.4	765.1	762.8	766.6	-1.8	1.3	32	83	1
809	2019.10.14	12.2	24.4	759.6	762.1	761.1	763.6	-1.8	1.5	30	90	1
810	2019.10.13	13.3	18.3	760.9	763.4	762.3	765.1	-1.3	0.6	40	84	1
811	2019.10.12	13.9	22.2	759.3	761.8	760.9	763.3	-1.6	1.3	46	83	1
812	2019.10.11	13.9	23.9	761.4	764.6	763	766.3	-2	0.8	31	63	1
813	2019.10.10	13.9	25.6	763.9	767.2	765.5	768.7	-1.5	0.5	39	69	1
814	2019.10.09	13.3	21.7	764.9	767.2	766.6	768.7	-1.5	1.3	47	84	1
815	2019.10.08	16.7	20	764.4	765.9	766	767.6	-1.3	0.7	45	81	1
816	2019.10.07	17.8	28.9	761.4	765.1	763	766.9	-1.8	2.8	44	81	1
817	2019.10.06	16.7	22.8	765.9	767.9	767.5	769.6	-0.8	0.3	66	79	1
818	2019.10.05	9.4	18.9	768.2	771.2	769.9	772.9	-1.5	1.1	49	71	1
819	2019.10.04	13.9	26.1	758.8	768.4	760.4	770	-0.5	3	32	88	1
820	2019.10.03	23.3	26.7	757.6	760.9	759.1	762.5	-0.8	1.8	71	85	1
821	2019.10.02	23.3	35.6	756.1	758.8	757.8	760.5	-1.5	0.8	32	91	1
822	2019.10.01	21.1	29.4	760.1	764.6	761.6	766.2	-1.8	0	57	77	1
823	2019.09.30	20.6	22.2	765.1	767.7	766.8	769.3	-1.3	0.8	73	87	1
824	2019.09.29	23.3	30.6	763.4	766.7	764.9	768.4	-0.8	1.5	48	82	1
825	2019.09.28	20	28.9	761.6	763.6	763.3	765.1	-1.1	1.3	65	87	1
826	2019.09.27	18.9	28.3	760.1	764.2	761.7	765.7	-1.3	1.5	38	84	1
827	2019.09.26	18.9	28.9	754.8	759.1	756.2	760.6	-1	2.1	44	84	1
828	2019.09.25	16.7	27.8	756.8	759.8	758.3	761.5	-1.7	1.1	31	73	1
829	2019.09.24	21.1	27.2	756.5	758.8	758.2	760.3	-1.2	1.3	33	71	1
830	2019.09.23	22.8	34.4	755.5	760.3	757.2	762	-2	1	27	81	1
831	2019.09.22	21.7	32.2	761.1	765.1	762.7	766.6	-2	0.4	44	81	1
832	2019.09.21	17.2	31.1	764.2	766.9	765.7	768.5	-1.5	0.7	39	81	1
833	2019.09.20	14.4	25.6	765.7	768.7	767.2	770.3	-1.7	0.5	36	83	1
834	2019.09.19	15.6	23.9	767.7	769.7	769.2	771.3	-1	1	22	78	1
835	2019.09.18	17.8	25.6	763.9	767.2	765.4	768.8	-0.8	1.5	35	87	1
836	2019.09.17	21.7	27.8	760.6	763.6	762.1	765.1	-1	1.5	46	82	1
837	2019.09.16	20.6	32.2	759.1	762.9	760.7	764.4	-1.8	1	35	87	1
838	2019.09.15	23.3	31.7	762.6	765.4	764.2	766.9	-1.5	0.5	27	85	1
839	2019.09.14	19.4	27.2	764.6	769	766.3	770.6	-1.7	0.3	60	79	1
840	2019.09.13	20.6	23.3	765.4	769.9	767.1	771.6	-0.2	1.5	66	93	1
841	2019.09.12	23.9	36.1	761.1	764.2	762.7	765.9	-0.8	2.1	35	82	1
842	2019.09.11	21.7	32.2	762.1	767.2	763.7	768.9	-2.3	0.3	47	91	1
843	2019.09.10	21.1	30.6	766.9	768.7	768.4	770.4	-1	0.8	43	87	1
844	2019.09.09	21.7	28.9	763.4	766.7	765.1	768.2	-0.8	1.5	41	76	1
845	2019.09.08	18.9	28.3	760.3	763.1	761.8	764.7	-0.7	1.8	41	73	1
846	2019.09.07	17.8	28.9	756.1	759.6	757.5	761.2	-0.6	1.5	36	81	1
847	2019.09.06	20	23.9	754.5	758.5	756.1	760.3	-1.3	0.8	62	73	1
848	2019.09.05	22.8	26.1	759.8	761.8	761.4	763.6	-1.1	1	54	79	1
849	2019.09.04	22.2	33.9	757.3	760.6	759	762.1	-1.8	1	49	88	1
850	2019.09.03	22.8	31.1	760.1	762.1	761.8	763.9	-1	1.5	38	84	1
851	2019.09.02	22.2	31.1	759.1	764.4	760.6	765.9	-1.5	1.3	54	88	1
852	2019.09.01	22.2	27.8	765.1	767.7	766.7	769.4	-1.2	0.8	58	84	1
853	2019.08.31	22.2	32.2	763.4	766.4	764.9	768	-0.8	1.5	41	74	1
854	2019.08.30	18.9	31.1	761.1	762.9	762.7	764.6	-1	1.3	35	76	1
855	2019.08.29	21.1	29.4	758.1	761.1	759.7	762.8	-0.8	1.3	32	64	1
856	2019.08.28	21.1	27.2	756.8	759.3	758.3	760.9	-1	0.6	61	87	1
857	2019.08.27	19.4	26.1	759.3	763.1	761	764.7	-1.3	0.8	58	81	1
858	2019.08.26	18.3	23.9	763.1	765.1	764.6	766.8	-1.3	0.5	58	81	1
859	2019.08.25	18.9	26.1	764.4	766.2	766	767.7	-0.8	1.1	47	78	1
860	2019.08.24	18.9	26.7	762.6	765.7	764.3	767.3	-0.5	1.3	38	78	1
861	2019.08.23	20	25	758.8	762.4	760.5	764	0	1	66	90	1
862	2019.08.22	25	33.9	757	759.8	758.8	761.3	-1.8	1.5	40	79	1
863	2019.08.21	22.2	32.8	757	761.1	758.5	762.8	-1.5	0.8	52	88	1
864	2019.08.20	23.9	35	760.3	762.6	761.9	764.3	-1.3	1.8	46	82	1
865	2019.08.19	25.6	35.6	759.3	761.4	761	763	-0.8	1.6	44	87	1
866	2019.08.18	25	35	759.1	760.9	760.6	762.4	-1	1	44	88	1
867	2019.08.17	25	32.8	758.8	760.9	760.5	762.4	-1.1	0.8	52	88	1
868	2019.08.16	23.3	31.7	759.1	760.9	760.7	762.4	-1.2	1	55	88	1
869	2019.08.15	24.4	29.4	758.1	760.3	759.7	762	-1	1.6	57	88	1
870	2019.08.14	25	31.1	754.3	758.1	755.8	759.6	-0.2	1.8	54	90	1
871	2019.08.13	25.6	29.4	754.3	756.8	755.9	758.5	-0.9	0.2	60	85	1
872	2019.08.12	21.1	32.2	757.3	761.1	759	762.7	-1.5	0.3	45	79	1
873	2019.08.11	20.6	30	759.8	762.4	761.5	763.9	-0.8	1.5	32	66	1
874	2019.08.10	20.6	29.4	757.3	759.3	758.9	760.9	-1	1.7	38	59	1
875	2019.08.09	24.4	32.8	754.3	756.8	755.8	758.2	-1.1	1.8	32	64	1
876	2019.08.08	22.8	32.8	753.7	755.2	755.5	757	-1.3	0.7	34	84	1
877	2019.08.07	23.3	33.9	754	756.1	755.6	757.7	-1.8	0.8	42	88	1
878	2019.08.06	22.8	32.2	755.2	758.3	756.8	759.8	-1.3	0.8	45	79	1
879	2019.08.05	23.9	31.7	758.5	760.1	760.2	761.8	-1.3	1	43	71	1
880	2019.08.04	25.6	32.8	758.1	759.3	759.6	760.9	-1	0.8	35	79	1
881	2019.08.03	23.9	31.7	758.5	762.4	760	763.9	-1.6	0.6	50	88	1
882	2019.08.02	22.8	30	761.8	763.6	763.6	765.3	-1.3	0.7	49	81	1
883	2019.08.01	22.2	32.8	761.1	762.9	762.6	764.5	-1.5	1	44	87	1
884	2019.07.31	23.9	32.2	760.3	761.8	761.8	763.6	-1.3	1.1	45	79	1
885	2019.07.30	25.6	34.4	758.5	761.1	760.3	762.6	-1.3	1.3	37	71	1
886	2019.07.29	24.4	33.9	759.6	762.1	761.2	763.7	-1.3	0.7	42	79	1
887	2019.07.28	23.9	32.8	761.8	765.1	763.5	766.7	-1.3	0.6	42	69	1
888	2019.07.27	22.2	31.1	764.6	767.9	766.3	769.5	-1.3	0.8	39	79	1
889	2019.07.26	21.1	30.6	765.7	767.5	767.2	769.1	-0.8	1	37	84	1
890	2019.07.25	18.9	29.4	761.6	765.1	763.3	766.7	-0.3	1.3	37	81	1
891	2019.07.24	21.1	28.3	757.3	761.4	758.9	763	-0.5	1.6	44	81	1
892	2019.07.23	21.1	25	754.8	757.8	756.3	759.5	-1	1.7	62	82	1
893	2019.07.22	25	34.4	754.5	757.6	756.1	759.1	-1.5	0.3	49	74	1
894	2019.07.21	28.3	36.7	756.3	758.1	757.9	759.7	-1	1.6	43	70	1
895	2019.07.20	27.8	35.6	756.5	759.3	758.1	760.8	-2	0.5	46	77	1
896	2019.07.19	26.1	35	757.6	759.6	759.3	761.2	-0.8	0.9	47	88	1
897	2019.07.18	26.1	33.3	756.8	757.8	758.5	759.3	-0.5	0.6	51	88	1
898	2019.07.17	25.6	34.4	756.5	760.6	758.2	762.3	-2	1.3	49	88	1
899	2019.07.16	25	32.8	760.9	762.9	762.4	764.5	-0.9	0.8	54	76	1
900	2019.07.15	23.9	32.2	761.4	763.1	762.9	764.8	-1	1.3	38	65	1
901	2019.07.14	24.4	33.9	759.3	761.4	761	762.8	-1	1.6	42	82	1
902	2019.07.13	23.3	32.2	758.3	760.6	759.8	762.1	-1	1.2	40	71	1
903	2019.07.12	22.2	32.2	755	757.8	756.7	759.4	-0.6	1.5	50	94	1
904	2019.07.11	22.8	32.8	755.2	759.8	756.7	761.3	-2	0.6	57	90	1
905	2019.07.10	22.2	30	760.1	762.6	761.6	764.3	-1.2	0.8	53	84	1
906	2019.07.09	20	29.4	761.4	762.9	763.1	764.4	-1	1	55	90	1
907	2019.07.08	22.8	25.6	756.5	761.1	758.2	762.6	-0.8	1.5	64	90	1
908	2019.07.07	24.4	31.7	756.5	758.5	758.2	760.2	-1.8	1	53	88	1
909	2019.07.06	24.4	33.3	757	760.6	758.8	762.3	-1.8	0.8	54	88	1
910	2019.07.05	25	31.7	761.1	763.1	762.8	764.8	-1	0.5	61	88	1
911	2019.07.04	25	32.2	759.1	762.6	760.8	764.2	-0.5	1.3	54	88	1
912	2019.07.03	23.3	32.2	756.5	759.1	758.2	760.6	-1.1	1.8	47	90	1
913	2019.07.02	21.1	33.3	755.8	759.1	757.3	760.6	-1.3	1	45	82	1
914	2019.07.01	21.7	30.6	758.8	760.6	760.3	762.2	-0.8	1.3	34	64	1
915	2019.06.30	23.3	32.8	755.5	758.8	757.1	760.5	-1.5	1.5	30	79	1
916	2019.06.29	22.8	34.4	759.6	762.9	761.2	764.6	-1.5	0.5	43	76	1
917	2019.06.28	23.3	33.3	762.6	764.9	764.3	766.6	-1.3	0.7	44	76	1
918	2019.06.27	24.4	33.3	762.9	764.9	764.6	766.6	-1.1	1.3	46	77	1
919	2019.06.26	23.3	32.8	760.1	762.6	761.8	764.3	-0.8	1.3	37	62	1
920	2019.06.25	23.9	32.2	754.5	759.6	756.1	761.2	-1	1.7	39	88	1
921	2019.06.24	21.1	30.6	755.5	758.1	757.1	759.7	-1	0.5	57	88	1
922	2019.06.23	18.3	28.9	759.1	763.1	760.6	764.7	-1.5	1	33	68	1
923	2019.06.22	20	28.3	759.3	761.6	760.9	763.1	-0.8	1.3	31	49	1
924	2019.06.21	21.7	28.9	749.2	758.5	750.8	760.3	-0.3	2.7	37	85	1
925	2019.06.20	23.3	32.2	748.2	751.7	749.7	753.4	-1.2	0.9	48	91	1
926	2019.06.19	22.8	29.4	752.5	757.6	754.2	759.1	-2	0.3	63	90	1
927	2019.06.18	22.2	30.6	757	759.6	758.8	761.2	-1.3	1.1	48	91	1
928	2019.06.17	23.9	31.7	757.8	760.1	759.4	761.8	-1	1.7	50	90	1
929	2019.06.16	21.1	30	756.5	759.6	758.1	761.2	-1.1	0.8	55	64	1
930	2019.06.15	16.7	28.3	760.3	764.4	762.1	766	-2.1	0.8	35	75	1
931	2019.06.14	13.9	26.1	757.6	763.9	759	765.6	-0.6	2	31	72	1
932	2019.06.13	18.3	24.4	753	757.8	754.6	759.4	-3.1	2.2	57	90	1
933	2019.06.12	17.8	24.4	760.9	765.1	762.4	766.7	-1.8	1.2	42	73	1
934	2019.06.11	18.3	26.1	757.3	762.9	758.8	764.5	0	2.3	31	87	1
935	2019.06.10	17.8	23.9	757	762.4	758.7	763.9	-1.3	0	76	93	1
936	2019.06.09	19.4	22.2	763.4	764.4	764.9	766	-1	1	57	87	1
937	2019.06.08	21.1	27.2	759.8	764.2	761.5	765.6	-0.2	1.3	47	76	1
938	2019.06.07	22.8	26.1	755.8	759.6	757.5	761.2	0	1.5	56	79	1
939	2019.06.06	21.7	31.1	753.5	755.8	755.1	757.5	-1.2	1	45	90	1
940	2019.06.05	18.9	27.8	754.5	760.9	756.1	762.4	-1.8	0.7	57	82	1
941	2019.06.04	13.3	25	761.4	765.7	763	767.3	-1.8	1.5	29	60	1
942	2019.06.03	17.2	23.3	756.5	762.9	758.1	764.5	-0.5	1.7	25	63	1
943	2019.06.02	20	28.9	752.8	756.1	754.3	757.6	-1.6	1.5	48	81	1
944	2019.06.01	20.6	29.4	754.8	757	756.4	758.5	-1.5	1.3	32	78	1
945	2019.05.31	20	28.3	754.5	756.5	756.1	758.1	-1.3	1.3	43	82	1
946	2019.05.30	23.3	30.6	753.7	755.5	755.2	757.3	-1.5	1.1	50	79	1
947	2019.05.29	23.9	32.8	751.7	754.8	753.4	756.2	-1.5	1.3	39	85	1
948	2019.05.28	21.7	31.7	753	757.6	754.6	759.1	-1.6	0.7	55	87	1
949	2019.05.27	21.7	28.9	757.8	759.8	759.4	761.5	-1.3	1.5	44	79	1
950	2019.05.26	21.1	32.2	758.3	761.1	760	762.7	-1.3	0.5	39	87	1
951	2019.05.25	19.4	27.2	761.6	765.7	763.3	767.2	-1.5	1.5	52	79	1
952	2019.05.24	21.1	28.3	758.5	762.9	760.1	764.4	-0.8	2.4	34	93	1
953	2019.05.23	16.7	27.8	759.3	765.9	761	767.5	-2.3	-0.5	62	90	1
954	2019.05.22	14.4	22.2	764.6	767.7	766.1	769.3	-0.8	1.5	36	60	1
955	2019.05.21	17.2	21.7	757.6	763.4	759.2	765.1	-0.2	1.8	36	54	1
956	2019.05.20	23.9	30.6	754.5	758.1	756.1	759.7	-1.6	1.8	39	69	1
957	2019.05.19	18.9	29.4	757.3	761.4	758.9	762.9	-2	0.8	58	87	1
958	2019.05.18	19.4	27.2	757	761.1	758.6	762.7	-1	1.8	58	84	1
959	2019.05.17	15	27.2	755	757.3	756.7	758.8	-1.3	1.5	51	90	1
960	2019.05.16	13.9	25.6	756.8	759.3	758.4	760.8	-1.3	1.5	29	81	1
961	2019.05.15	10.6	23.9	757.8	764.6	759.3	766.2	-1.6	5.5	27	90	1
962	2019.05.14	11.7	16.1	756.1	759.1	757.6	760.8	-0.6	1.1	44	89	1
963	2019.05.13	10	15	754.5	756.5	756.1	758.2	-0.9	1	75	89	1
964	2019.05.12	11.7	16.1	753.7	756.5	755.4	758	-1.8	1.1	83	90	1
965	2019.05.11	15	21.1	758.3	762.1	760	763.7	-2.1	1	55	87	1
966	2019.05.10	20	27.2	758.8	762.1	760.4	763.8	-1.3	1.5	58	87	1
967	2019.05.09	16.7	24.4	762.4	765.9	764	767.6	-1.3	0.5	66	81	1
968	2019.05.08	17.8	22.8	763.1	765.4	764.6	767.1	-0.7	1.1	69	81	1
969	2019.05.07	16.7	26.1	762.4	764.6	764	766.1	-1.5	0.8	52	87	1
970	2019.05.06	15	25	756.8	762.6	758.5	764.3	-1	2	43	81	1
971	2019.05.05	15.6	19.4	751.9	755.5	753.4	757.2	-1.1	1.8	78	91	1
972	2019.05.04	18.9	23.9	754.5	757.6	756.2	759.1	-1.5	0.7	66	84	1
973	2019.05.03	18.9	25.6	757.3	762.1	758.9	763.6	-2.2	1.8	67	87	1
974	2019.05.02	15.6	28.9	761.6	764.2	763.2	765.7	-1.3	0.8	55	93	1
975	2019.05.01	15.6	20	764.6	769.2	766.3	770.8	-2	1.3	70	84	1
976	2019.04.30	13.9	26.7	764.2	767.2	765.8	768.8	-1.8	1.5	49	83	1
977	2019.04.29	8.9	16.1	766.4	771.2	768	772.8	-2.6	1.5	36	78	1
978	2019.04.28	11.7	21.7	757	767.2	758.6	768.8	-1.8	4.4	49	74	1
979	2019.04.27	12.8	21.7	751.7	757.3	753.4	758.8	-0.5	1.8	18	58	0
980	2019.04.26	15	23.3	744.9	755.5	746.4	757.1	-3.7	3.1	51	84	1
981	2019.04.25	17.2	24.4	756.5	758.8	758.1	760.5	-1.2	1	37	59	1
982	2019.04.24	18.9	24.4	754.5	757.8	756.1	759.3	-1	2	25	66	1
983	2019.04.23	13.3	26.7	755	762.4	756.5	763.9	-2.5	0.8	38	78	1
984	2019.04.22	12.8	22.8	761.6	764.2	763.2	765.8	-1.3	1.3	39	68	1
985	2019.04.21	12.2	20	756.3	762.6	757.9	764.1	-0.2	2	36	69	1
986	2019.04.20	16.7	22.2	748.9	755.5	750.5	757	-1.5	2.3	38	84	1
987	2019.04.19	18.9	22.8	750.2	755.5	751.7	757	-2.4	0	68	82	1
988	2019.04.18	12.8	26.1	755.2	762.6	756.7	764.2	-2.6	0.9	48	81	1
989	2019.04.17	13.9	21.1	760.6	762.9	762.1	764.5	-0.8	1.8	45	67	1
990	2019.04.16	7.2	20.6	760.9	765.7	762.6	767.3	-2.3	1.8	27	63	1
991	2019.04.15	10	21.7	744.9	761.1	746.5	762.8	-1.7	4.1	38	84	1
992	2019.04.14	17.2	23.9	746.6	759.8	748.3	761.3	-3.6	-0.5	66	93	1
993	2019.04.13	17.2	23.3	760.9	763.1	762.5	764.7	-1.2	1.1	50	97	1
994	2019.04.12	9.4	19.4	761.8	765.1	763.5	766.9	-1.8	0.7	65	90	1
995	2019.04.11	10	16.1	761.1	765.4	762.7	767.1	-1	2.8	45	72	1
996	2019.04.10	12.8	21.7	755	760.1	756.5	761.5	-0.7	2.8	26	55	1
997	2019.04.09	16.7	26.7	748.6	754.3	750.4	755.8	-2.1	3.1	18	93	1
998	2019.04.08	15.6	28.3	754.5	760.3	756.1	761.8	-2	0.7	38	84	1
999	2019.04.07	11.7	21.7	761.1	767.5	762.7	769	-2.6	1.6	47	87	1
1000	2019.04.06	8.3	20	764.9	766.7	766.6	768.2	-0.8	1.6	45	86	1
1001	2019.04.05	8.9	12.2	766.2	770.2	767.8	771.8	-2.5	0.3	55	80	1
1002	2019.04.04	7.8	19.4	768.2	771.5	769.7	773.2	-1.3	2	25	66	1
1003	2019.04.03	4.4	21.7	762.9	766.9	764.4	768.7	-1.5	2	15	77	0
1004	2019.04.02	4.4	9.4	762.9	769.7	764.5	771.4	-2.3	0	35	80	0
1005	2019.04.01	1.1	10.6	765.9	769.9	767.5	771.5	-0.8	2.3	22	48	0
1006	2019.03.31	4.4	16.7	751.7	763.6	753.3	765.4	-1.6	3.1	31	70	1
1007	2019.03.30	11.1	25.6	754.8	761.8	756.4	763.5	-2.4	0.8	28	83	1
1008	2019.03.29	11.1	21.1	762.4	764.6	763.9	766.3	-1.6	0.3	35	66	1
1009	2019.03.28	3.3	16.1	765.9	772.3	767.5	773.9	-2.5	0.8	41	76	1
1010	2019.03.27	2.8	12.2	770.8	774.1	772.3	775.6	-1.7	2	21	51	0
1011	2019.03.26	3.9	10.6	763.1	769.9	764.7	771.7	-0.5	2.5	22	73	0
1012	2019.03.25	8.3	17.2	759.3	762.4	761	764.1	-1	2.1	38	74	1
1013	2019.03.24	2.8	18.9	762.4	768.4	763.9	770.1	-2.5	1.2	18	70	0
1014	2019.03.23	3.3	12.2	757.3	766.9	758.8	768.5	0	2.6	23	51	0
1015	2019.03.22	6.1	12.2	748.9	756.1	750.4	757.6	-0.7	2.8	43	79	1
1016	2019.03.21	6.1	9.4	748.6	764.6	750.4	766.3	-4.3	-0.9	71	89	1
1017	2019.03.20	3.3	12.8	766.2	770.8	767.8	772.4	-2.1	0.6	28	70	0
1018	2019.03.19	2.8	11.7	770.5	772.8	772	774.5	-1.2	1.2	22	48	0
1019	2019.03.18	5	10	765.7	769.9	767.3	771.6	-0.4	1.5	39	73	0
1020	2019.03.17	3.9	11.7	764.4	767.7	766	769.4	-1.8	1.6	22	48	0
1021	2019.03.16	6.7	13.3	758.8	765.9	760.3	767.5	-1	2.5	24	43	0
1022	2019.03.15	16.7	25	753	757.8	754.6	759.4	-2	3.1	32	68	1
1023	2019.03.14	7.8	21.7	759.1	766.4	760.7	768	-2.3	-0.3	44	68	1
1024	2019.03.13	2.2	15	766.4	769.9	768	771.5	-1.8	0.9	33	70	0
1025	2019.03.12	5	11.7	765.1	769	766.9	770.5	-0.7	1.3	23	45	0
1026	2019.03.11	11.1	16.1	761.4	764.6	763	766.4	-1.3	1.6	19	59	0
1027	2019.03.10	4.4	15.6	757.6	764.9	759.1	766.5	-2.3	2.2	65	93	1
1028	2019.03.09	2.2	6.1	766.2	768.7	767.8	770.4	-0.8	1.3	68	86	1
1029	2019.03.08	0.6	3.9	766.2	770.5	767.8	772.1	-1.8	0.6	42	92	0
1030	2019.03.07	-3.9	7.2	767.9	769.9	769.5	771.7	-1	1.1	26	53	0
1031	2019.03.06	-5.6	0.6	763.9	769	765.5	770.6	-0.8	2.1	26	42	0
1032	2019.03.05	-2.2	5	759.1	763.9	760.7	765.5	-2.5	3	32	53	0
1033	2019.03.04	0	5.6	753.7	762.6	755.4	764.2	-1.8	2.5	38	89	0
1034	2019.03.03	2.8	7.8	755.5	764.9	757.2	766.4	-2.8	0.5	49	89	0
1035	2019.03.02	2.2	8.3	761.4	764.4	762.8	766	-1.2	1.3	59	89	1
1036	2019.03.01	1.1	2.8	763.6	767.7	765.3	769.1	-1.5	1	62	89	0
1037	2019.02.28	3.9	9.4	759.1	766.4	760.8	768.1	-2	2.6	28	79	0
1038	2019.02.27	0	5	761.1	770.8	762.7	772.3	-3.3	0.9	54	70	0
1039	2019.02.26	1.7	11.7	767.9	771.5	769.5	773	-2	1.6	21	45	0
1040	2019.02.25	5.6	10	754.5	768.4	756.1	769.9	0.8	3.3	14	28	0
1041	2019.02.24	3.9	13.3	746.6	761.6	748.1	763.2	-4.6	4.1	28	93	1
1042	2019.02.23	3.9	6.1	764.9	772	766.4	773.6	-2.1	1	60	89	1
1043	2019.02.22	6.7	10	766.2	771.7	767.7	773.3	-0.3	1.8	39	76	0
1044	2019.02.21	1.7	14.4	760.3	765.1	761.9	766.6	-2.5	2	30	89	1
1045	2019.02.20	-0.6	2.8	763.6	775.8	765.1	777.4	-3.6	0	42	89	0
1046	2019.02.19	-1.1	5.6	771.7	777.1	773.3	778.6	-1.3	2.2	24	52	0
1047	2019.02.18	3.3	10.6	755	769.5	756.5	771.1	-2.8	4.1	44	89	0
1048	2019.02.17	0	4.4	759.8	763.9	761.5	765.5	-2.5	1.8	48	82	0
1049	2019.02.16	2.8	10	755.5	761.6	757.2	763.1	-0.5	1.8	22	52	0
1050	2019.02.15	8.3	16.7	751.5	757.3	753.1	758.8	-2.3	2.1	41	63	1
1051	2019.02.14	1.7	10.6	759.1	763.6	760.6	765.3	-1.5	1.7	33	64	0
1052	2019.02.13	3.9	9.4	752.2	759.8	753.7	761.3	-2.1	2	38	89	0
1053	2019.02.12	1.7	4.4	754.3	768.4	755.8	770	-3.3	-0.3	89	93	1
1054	2019.02.11	1.1	2.8	766.9	769	768.5	770.5	-2.2	1	85	89	0
1055	2019.02.10	-2.8	4.4	771.2	779.1	772.8	780.7	-3	0.2	36	79	0
1056	2019.02.09	-1.7	2.8	772	780.1	773.7	781.9	-0.3	3	31	43	0
1057	2019.02.08	3.9	15	758.8	770.5	760.4	772	-1	3.8	25	93	0
1058	2019.02.07	7.8	12.8	759.8	763.1	761.3	764.8	-1.5	1.7	69	93	1
1059	2019.02.06	6.1	13.9	760.1	764.6	761.8	766.3	-2	0.8	58	86	1
1060	2019.02.05	2.8	22.8	759.6	762.6	761.2	764.3	-1	1.3	43	89	1
1061	2019.02.04	1.1	16.7	760.6	763.4	762.2	765.1	-1.3	0.5	43	85	1
1062	2019.02.03	-1.7	12.8	762.9	765.4	764.4	766.9	-1.3	0.8	47	85	0
1063	2019.02.02	-7.2	4.4	765.1	771.5	766.7	773.1	-2.9	0.3	55	81	0
1064	2019.02.01	-6.7	-4.4	769.7	772	771.2	773.5	-2.1	1.3	50	81	0
1065	2019.01.31	-12.2	-4.4	769.7	773.2	771.3	774.9	-1.5	1.3	19	41	0
1066	2019.01.30	-10	3.3	757	768.7	758.5	770.2	-2.3	4.6	33	60	0
1067	2019.01.29	-0.6	5	755.8	760.6	757.3	762.2	-2	2.6	56	86	0
1068	2019.01.28	-0.6	4.4	761.1	764.2	762.6	765.7	-1.6	2.1	23	50	0
1069	2019.01.27	-1.7	8.9	759.3	764.9	760.9	766.5	-1.6	0.8	39	78	0
1070	2019.01.26	-1.7	5	765.1	767.5	766.8	769	-1.6	1.3	32	56	0
1071	2019.01.25	0	5.6	758.5	765.4	760.3	767.1	0.5	1.8	28	59	0
1072	2019.01.24	3.3	15.5	745.9	757	747.5	758.7	-3.8	4.6	55	93	1
1073	2019.01.23	0	9.4	758.3	773.2	759.9	775	-3	-1	36	71	0
1074	2019.01.22	-8.9	0	775	779.6	776.6	781.1	-1.8	1.3	32	56	0
1075	2019.01.21	-9.4	-5	762.6	775	764.2	776.6	0.5	2.8	30	43	0
1076	2019.01.20	-5.6	10.6	743.1	759.8	744.7	761.2	-6.1	3.8	33	93	0
1077	2019.01.19	2.8	3.9	753.7	766.2	755.2	767.8	-4.1	0.8	76	93	1
1078	2019.01.18	1.1	3.9	762.4	765.4	764	767	-1.5	1.2	82	92	1
1079	2019.01.17	1.1	3.9	765.7	769.9	767.2	771.6	-1.5	0.7	50	89	0
1080	2019.01.16	-2.8	6.1	763.6	767.9	765.2	769.5	-1	1.5	51	81	0
1081	2019.01.15	-2.2	3.3	765.1	766.9	766.8	768.5	-1.8	1.5	52	78	0
1082	2019.01.14	-1.1	2.2	765.7	768.2	767.2	769.9	-1.3	1	44	82	0
1083	2019.01.13	-1.7	0	766.7	771.5	768.1	773.1	-2.8	1	82	89	0
1084	2019.01.12	-1.1	2.8	772.5	775	774	776.6	-1.5	1.2	37	88	0
1085	2019.01.11	-1.7	3.3	765.4	772.3	766.9	773.8	-0.9	2.2	34	49	0
1086	2019.01.10	-0.6	2.8	758.3	764.6	760	766.3	0	1.6	37	47	0
1087	2019.01.09	1.7	12.2	753.2	758.3	754.8	759.8	-1.2	1.8	38	53	0
1088	2019.01.08	3.9	13.9	752.8	766.7	754.3	768.2	-4.1	-0.4	64	82	1
1089	2019.01.07	2.2	4.4	768.2	773.5	769.7	775.1	-2	1.7	46	65	0
1090	2019.01.06	5	13.3	757.3	768.4	758.8	770	0.5	2.8	35	82	0
1091	2019.01.05	7.8	12.2	747.1	756.5	748.7	758	-3.3	3.1	54	90	1
1092	2019.01.04	2.8	9.4	753.5	762.4	755.2	763.9	-2.8	0.8	74	90	1
1093	2019.01.03	6.1	10.6	759.1	762.6	760.6	764.3	-3.1	1.8	48	77	1
1094	2019.01.02	6.1	8.9	763.4	769	764.9	770.6	-1.8	1.3	61	79	1
1095	2019.01.01	8.9	17.8	753.7	765.7	755.4	767.4	-3.3	3.3	50	92	1
1096	2018.12.31	3.9	10	758.1	767.9	759.6	769.6	-3.3	0.4	79	93	1
1097	2018.12.30	5	8.3	764.9	767.5	766.6	769	-2.1	2	60	76	0
1098	2018.12.29	6.1	13.9	758.5	766.7	760.2	768.4	0.2	2.3	41	97	1
1099	2018.12.28	6.7	12.2	756.8	768.7	758.4	770.2	-2.8	1.3	89	97	1
1100	2018.12.27	1.1	10.6	770.8	775.8	772.4	777.5	-2.3	0.8	46	85	0
1101	2018.12.26	0	7.8	771.5	775.3	773.1	776.8	-2.1	1.8	49	76	0
1102	2018.12.25	2.2	6.1	767.5	771.2	769	772.7	-1.6	1.3	43	59	0
1103	2018.12.24	5	8.3	761.6	766.7	763.1	768.3	-1.3	1.5	37	83	0
1104	2018.12.23	3.3	8.9	762.6	766.4	764.2	768	-2.2	1.3	54	68	0
1105	2018.12.22	6.7	11.1	743.8	762.4	745.6	764.1	1.8	3.8	47	77	1
1106	2018.12.21	11.7	17.8	739.8	746.4	741.3	748	-3.8	0.4	73	90	1
1107	2018.12.20	2.8	10	750.2	762.6	751.7	764.3	-4.3	0	70	93	1
1108	2018.12.19	0.6	9.4	762.6	765.9	764.2	767.5	-2.3	0.5	50	72	0
1109	2018.12.18	3.9	7.8	760.3	765.7	761.8	767.2	-0.4	2	35	53	0
1110	2018.12.17	5.6	13.3	756.1	759.8	757.6	761.4	-2	2.7	32	82	0
1111	2018.12.16	6.7	10	756.1	758.3	757.6	760	-1.5	1.3	76	90	1
1112	2018.12.15	9.4	11.7	758.5	764.2	760.2	765.7	-2.2	0	89	93	1
1113	2018.12.14	3.9	8.9	766.4	771.2	767.9	772.9	-1.7	0.7	71	90	1
1114	2018.12.13	3.9	10.6	765.1	770.5	766.8	772.1	-0.5	1.5	44	68	0
1115	2018.12.12	0	7.8	762.4	766.2	763.9	767.8	-1.6	1.5	42	72	0
1116	2018.12.11	-2.2	7.2	761.4	765.4	762.9	767.1	-2.8	0.4	35	75	0
1117	2018.12.10	-1.1	4.4	762.6	765.9	764.3	767.4	-1.7	2	48	64	0
1118	2018.12.09	0	1.7	764.9	774.5	766.6	776.2	-2.2	-0.7	50	58	0
1119	2018.12.08	-2.2	3.9	772.5	775.6	774.1	777.1	-1.8	1.8	36	72	0
1120	2018.12.07	1.1	6.1	766.9	772.8	768.4	774.4	-0.5	2.3	35	62	0
1121	2018.12.06	0.6	6.1	766.4	769.2	768	770.8	-2	1	42	64	0
1122	2018.12.05	1.1	3.9	762.4	765.9	763.9	767.5	-0.7	1.5	48	67	0
1123	2018.12.04	3.3	7.8	757.3	763.1	759	764.8	-0.6	1.8	45	61	0
1124	2018.12.03	8.9	16.7	751.2	756.8	752.8	758.3	-1	2.3	38	96	1
1125	2018.12.02	7.8	13.9	751	757.8	752.6	759.4	-2.8	0.3	87	93	1
1126	2018.12.01	3.3	6.7	760.6	765.7	762.1	767.2	-1.8	0.7	74	89	1
1127	2018.11.30	3.3	7.2	760.6	763.6	762.1	765.1	-1.2	1.3	50	71	0
1128	2018.11.29	0	5.6	760.6	764.2	762.1	765.6	-1.1	1.3	41	56	0
1129	2018.11.28	0	3.9	752.5	760.3	754	761.8	-0.5	2.3	38	52	0
1130	2018.11.27	2.8	6.1	749.9	753.2	751.6	754.9	-1	1.5	45	56	0
1131	2018.11.26	6.7	11.1	747.1	756.8	748.9	758.5	-3.5	1.8	58	93	1
1132	2018.11.25	3.9	13.9	755.2	758.8	756.8	760.4	-0.7	1.7	62	89	1
1133	2018.11.24	1.7	8.3	751.9	768.4	753.6	769.9	-3.6	2.1	52	86	1
1134	2018.11.23	-2.2	1.7	770.2	776.5	771.8	778	-2	0.7	34	44	0
1135	2018.11.22	-1.1	5.6	767.7	775.8	769.3	777.4	-1	2.5	31	50	0
1136	2018.11.21	1.7	12.2	763.1	766.9	764.8	768.4	-1.8	2.8	35	72	0
1137	2018.11.20	6.7	11.7	757.6	764.6	759.1	766.3	-0.7	2.3	44	90	1
1138	2018.11.19	5.6	13.9	758.5	764.9	760.3	766.5	-2	0.3	62	85	1
1139	2018.11.18	1.7	10.6	765.7	769.9	767.3	771.7	-2	0.4	56	86	1
1140	2018.11.17	5	10	763.4	769	764.9	770.6	-1.2	2.3	48	68	0
1141	2018.11.16	2.8	10.6	752.2	762.4	753.7	764	-0.6	2.4	46	89	0
1142	2018.11.15	1.1	5	752.8	774.1	754.3	775.7	-5.1	0	50	89	0
1143	2018.11.14	3.9	6.7	767.7	774.1	769.3	775.6	-0.5	2	42	58	0
1144	2018.11.13	6.7	10	759.6	766.4	761.3	768.1	-3.8	2	59	93	1
1145	2018.11.12	2.2	10	767.2	771.2	768.7	772.9	-1.7	0.7	56	86	1
1146	2018.11.11	0	8.3	769.9	772.5	771.7	774.1	-1.7	1.1	39	64	0
1147	2018.11.10	2.2	9.4	758.5	769.7	760.2	771.3	0.4	2.4	27	80	0
1148	2018.11.09	7.8	11.1	758.1	768.2	759.6	769.7	-4	0	59	90	1
1149	2018.11.08	10.6	15	764.2	768.2	765.8	769.9	-0.7	2	38	77	1
1150	2018.11.07	10	16.7	759.8	763.9	761.5	765.4	-0.3	1.5	48	89	1
1151	2018.11.06	12.2	15.6	755.5	761.6	757.3	763.2	-1.8	1.3	90	93	1
1152	2018.11.05	11.7	12.8	762.9	769.2	764.4	770.9	-2.5	0	75	93	1
1153	2018.11.04	6.1	14.4	770.8	774.3	772.3	776	-2	1.5	42	86	1
1154	2018.11.03	9.4	15.6	752.2	770.2	753.9	771.7	0.7	3.5	39	83	1
1155	2018.11.02	13.3	22.2	750.2	753.2	751.7	754.8	-1.5	1.3	68	90	1
1156	2018.11.01	13.9	22.8	753.7	758.3	755.4	760	-1.5	0	55	87	1
1157	2018.10.31	8.9	18.9	759.1	763.6	760.7	765.4	-2.1	0.5	56	83	1
1158	2018.10.30	6.7	17.8	762.9	764.9	764.5	766.6	-1	1.2	41	83	1
1159	2018.10.29	9.4	15	754	762.4	755.5	764	0.3	2	44	77	1
1160	2018.10.28	10.6	16.1	753.7	757.3	755.4	758.8	-1.3	1.3	48	86	1
1161	2018.10.27	10	12.2	749.5	753.5	751	755	-3.1	1.3	72	93	1
1162	2018.10.26	7.2	10	755.2	763.4	756.8	764.9	-3.1	0.2	68	86	1
1163	2018.10.25	5	12.2	763.4	767.2	764.9	768.8	-2	0.8	42	66	1
1164	2018.10.24	7.8	13.9	763.9	767.5	765.5	769	-0.7	1.1	37	61	1
1165	2018.10.23	7.8	21.7	759.6	764.2	761.2	765.7	-2	2	32	83	1
1166	2018.10.22	3.9	13.9	764.4	769	766	770.5	-2.3	0.5	42	76	1
1167	2018.10.21	7.2	12.2	754.8	767.2	756.4	768.8	0.2	4.6	41	61	0
1168	2018.10.20	13.3	19.4	751.9	757.6	753.6	759.1	-2.4	1.5	55	87	1
1169	2018.10.19	6.7	18.3	759.6	770.2	761.2	772	-3.1	0	43	83	1
1170	2018.10.18	9.4	14.4	767.5	771.7	769	773.5	-0.8	2.1	36	74	1
1171	2018.10.17	12.2	20	761.1	765.4	762.7	766.9	-1.5	2.3	30	81	1
1172	2018.10.16	13.3	18.3	762.6	766.4	764.2	767.9	-1.5	3	44	70	1
1173	2018.10.15	15	22.2	759.6	764.9	761.1	766.6	-1.3	-0.2	79	90	1
1174	2018.10.14	9.4	15.6	765.1	767.7	766.9	769.3	-1.3	1.3	66	75	1
1175	2018.10.13	10	15.6	756.3	764.2	757.8	765.8	-0.5	2	46	74	1
1176	2018.10.12	12.8	19.4	748.9	756.8	750.5	758.4	-0.5	3	42	63	1
1177	2018.10.11	22.8	27.8	748.2	756.8	749.6	758.4	-1.8	-0.8	77	91	1
1178	2018.10.10	22.8	27.8	758.1	764.9	759.8	766.4	-2	-0.3	69	90	1
1179	2018.10.09	22.2	27.8	765.7	769	767.2	770.7	-1.5	0.3	63	91	1
1180	2018.10.08	22.2	28.3	766.9	769.2	768.5	770.7	-0.7	0.9	63	94	1
1181	2018.10.07	22.2	27.8	764.4	766.4	766.1	768.1	-0.8	1.3	72	94	1
1182	2018.10.06	19.4	23.9	764.4	765.7	766	767.2	-0.7	1	76	87	1
1183	2018.10.05	19.4	24.4	760.1	764.9	761.6	766.4	-0.3	2.6	57	88	1
1184	2018.10.04	20.6	29.4	758.5	761.6	760.3	763.3	-1.6	1.1	59	90	1
1185	2018.10.03	20.6	30	761.1	762.6	762.7	764.1	-0.8	0.8	49	93	1
1186	2018.10.02	19.4	28.9	761.6	766.2	763.3	767.7	-1.8	0.2	57	87	1
1187	2018.10.01	17.8	26.7	766.2	768.7	767.8	770.2	-1.5	0.7	64	90	1
1188	2018.09.30	16.7	23.9	767.5	769.7	769.2	771.4	-1	1.3	56	81	1
1189	2018.09.29	17.2	25.6	764.6	767.2	766.1	768.8	-0.8	1	43	90	1
1190	2018.09.28	15.5	24.4	759.6	764.4	761.2	766	-0.7	2	54	90	1
1191	2018.09.27	15	22.2	760.9	764.2	762.4	765.7	-1.5	1.5	59	90	1
1192	2018.09.26	22.2	28.9	757.3	762.4	758.8	764	-1.8	2	65	94	1
1193	2018.09.25	20	26.1	763.1	767.9	764.7	769.6	-1.3	0	77	91	1
1194	2018.09.24	17.2	19.4	766.9	769.2	768.4	770.9	-0.8	1.5	81	93	1
1195	2018.09.23	16.7	18.3	764.9	766.7	766.4	768.3	-0.6	1	68	90	1
1196	2018.09.22	18.9	26.7	760.9	765.4	762.4	767.1	-0.7	1.7	54	88	1
1197	2018.09.21	20.6	25.6	761.1	766.4	762.6	768	-2.3	0.7	74	87	1
1198	2018.09.20	21.1	28.3	761.8	765.9	763.5	767.5	-0.8	2.1	63	82	1
1199	2018.09.19	22.8	30.6	756.5	761.4	758.1	762.8	-0.3	1.8	50	79	1
1200	2018.09.18	23.9	27.2	754.5	756.5	756.1	758.1	-0.9	1	65	91	1
1201	2018.09.17	22.2	26.1	757	763.6	758.5	765.2	-1.8	0	82	94	1
1202	2018.09.16	21.1	27.2	763.9	765.7	765.4	767.3	-1	0.7	65	90	1
1203	2018.09.15	21.1	27.2	763.6	764.9	765.1	766.6	-0.7	1	67	90	1
1204	2018.09.14	22.2	25.6	763.4	764.4	764.9	766	-0.5	0.8	79	94	1
1205	2018.09.13	23.3	26.7	763.9	765.9	765.4	767.5	-1	0.8	76	90	1
1206	2018.09.12	21.7	29.4	764.2	765.7	765.7	767.3	-0.9	0.8	68	90	1
1207	2018.09.11	21.7	24.4	761.4	764.4	762.9	766	-0.5	1	82	94	1
1208	2018.09.10	18.3	23.9	760.1	762.1	761.8	763.8	-1.3	1.3	87	91	1
1209	2018.09.09	16.7	19.4	761.1	762.6	762.6	764.2	-0.8	1	84	90	1
1210	2018.09.08	18.3	24.4	761.1	762.6	762.6	764.2	-1	0.6	82	91	1
1211	2018.09.07	23.9	32.2	761.6	763.9	763.2	765.4	-1	0.5	52	88	1
1212	2018.09.06	26.1	33.3	762.4	764.9	763.9	766.6	-1.5	1	51	85	1
1213	2018.09.05	25.6	33.3	764.2	766.7	765.9	768.3	-1.5	0.7	52	85	1
1214	2018.09.04	26.7	32.2	765.1	767.2	766.9	768.8	-1	0.8	59	88	1
1215	2018.09.03	25.6	32.8	765.1	767.7	766.9	769.3	-1.3	1.3	57	90	1
1216	2018.09.02	23.9	31.7	764.9	767.5	766.5	769	-1.6	1.3	59	88	1
1217	2018.09.01	23.9	30.6	765.4	766.7	766.9	768.3	-0.8	1	63	91	1
1218	2018.08.31	24.4	31.7	762.9	765.4	764.5	767.1	-1	1.8	53	88	1
1219	2018.08.30	26.7	33.3	760.6	762.9	762.3	764.6	-1.5	1.2	44	76	1
1220	2018.08.29	26.7	34.4	759.3	762.4	761	764	-1.6	1.6	51	87	1
1221	2018.08.28	25.6	33.3	761.6	763.6	763.3	765.2	-1.3	0.7	52	90	1
1222	2018.08.27	23.9	32.8	762.4	764.2	763.9	765.7	-1.1	0.8	56	91	1
1223	2018.08.26	20	30	762.4	765.7	764.1	767.2	-1.3	0.7	54	84	1
1224	2018.08.25	20	27.8	765.1	767.5	766.8	769.1	-1.2	1.1	49	76	1
1225	2018.08.24	18.9	28.3	764.6	766.4	766.2	768	-1.3	1.1	37	78	1
1226	2018.08.23	19.4	26.7	758.8	764.2	760.4	765.7	-0.5	1.8	36	66	1
1227	2018.08.22	22.8	28.9	754.8	758.3	756.4	760	-1.6	1.8	51	91	1
1228	2018.08.21	24.4	26.7	756.8	761.4	758.2	762.9	-2.3	0	79	91	1
1229	2018.08.20	22.2	27.2	761.6	763.1	763.2	764.8	-1.1	0.8	67	82	1
1230	2018.08.19	22.8	28.9	756.5	761.4	758.2	763	-0.3	1.6	53	82	1
1231	2018.08.18	25	31.7	755.8	759.3	757.3	760.8	-1.5	0.4	53	79	1
1232	2018.08.17	25.6	33.9	759.3	762.9	760.9	764.4	-1.2	0.2	54	85	1
1233	2018.08.16	22.7	31.7	761.8	763.1	763.5	764.5	-1.1	0.8	52	88	1
1234	2018.08.15	23.3	32.2	759.6	761.8	761.2	763.5	-0.5	1.1	42	76	1
1235	2018.08.14	21.1	30	757.6	759.6	759.3	761.3	-1.2	1.1	45	82	1
1236	2018.08.13	23.3	29.4	758.1	760.6	759.7	762.1	-1.3	0.5	59	85	1
1237	2018.08.12	23.9	30	759.1	761.4	760.6	763	-0.6	1.3	59	85	1
1238	2018.08.11	25.6	30.6	757.6	759.3	759.1	760.9	-0.7	1.2	57	85	1
1239	2018.08.10	26.1	33.3	757	758.8	758.7	760.6	-1.1	0.8	43	74	1
1240	2018.08.09	25	33.3	756.5	758.1	758.2	759.7	-1.1	1.3	44	72	1
1241	2018.08.08	25	34.4	756.3	759.3	757.9	760.9	-1.6	0.6	46	85	1
1242	2018.08.07	24.4	31.7	758.8	761.4	760.3	762.8	-1	0.3	57	88	1
1243	2018.08.06	23.9	32.2	761.4	763.9	763	765.5	-1.2	0.4	58	88	1
1244	2018.08.05	23.3	31.7	763.1	765.1	764.8	766.9	-1.3	0.8	50	94	1
1245	2018.08.04	23.3	31.7	762.6	764.6	764.1	766.3	-0.7	1.3	47	91	1
1246	2018.08.03	23.3	27.8	762.9	764.6	764.5	766.2	-1	0.6	69	88	1
1247	2018.08.02	23.9	29.4	762.4	763.9	763.9	765.4	-1.3	0.8	68	90	1
1248	2018.08.01	23.3	30.6	760.6	762.4	762.1	764.1	-1.2	1.8	59	88	1
1249	2018.07.31	22.2	28.3	761.4	763.1	763	764.7	-1.5	0.3	67	87	1
1250	2018.07.30	22.8	25	762.1	763.4	763.8	765	-0.5	0.5	66	84	1
1251	2018.07.29	21.7	29.4	762.4	763.9	763.9	765.5	-0.8	0.7	40	73	1
1252	2018.07.28	22.2	30.6	760.1	761.8	761.6	763.6	-1	0.8	40	84	1
1253	2018.07.27	24.4	31.7	758.8	760.9	760.6	762.4	-0.8	1.3	47	91	1
1254	2018.07.26	23.3	31.1	757	759.8	758.8	761.4	-0.6	1.3	49	91	1
1255	2018.07.25	23.3	30	756.8	759.6	759.7	761.2	-1.3	0.5	65	91	1
1256	2018.07.24	23.9	28.3	760.1	762.1	761.7	763.7	-1	0.7	72	90	1
1257	2018.07.23	24.4	28.3	757	761.4	758.5	762.9	-0.3	1.3	67	88	1
1258	2018.07.22	18.3	27.8	751.9	757.3	753.5	759	-0.7	1.7	72	88	1
1259	2018.07.21	20.6	23.3	751.9	761.1	753.5	762.7	-2.5	0	71	90	1
1260	2018.07.20	22.2	28.3	761.4	763.6	762.8	765.3	-1.5	0.7	43	74	1
1261	2018.07.19	22.2	30.6	760.9	763.1	762.6	764.8	-0.8	1	31	64	1
1262	2018.07.18	22.2	31.1	757.3	760.1	758.9	761.6	-0.7	1.3	29	71	1
1263	2018.07.17	23.9	31.7	754.8	758.3	756.4	759.9	-1.3	1.3	61	87	1
1264	2018.07.16	24.4	34.4	758.3	760.6	760	762.2	-1	0.5	48	79	1
1265	2018.07.15	23.3	30	759.8	762.4	761.6	764	-1.1	0.5	55	72	1
1266	2018.07.14	21.7	32.2	761.6	765.4	763.3	767.1	-1.3	0.8	27	69	1
1267	2018.07.13	22.2	31.1	764.6	766.7	766.4	768.3	-0.8	0.8	36	79	1
1268	2018.07.12	23.9	32.8	762.1	765.7	763.7	767.4	-0.6	1.3	30	72	1
1269	2018.07.11	27.2	33.9	757.8	761.4	759.5	763	-0.3	1.6	33	58	1
1270	2018.07.10	21.7	35	757.6	762.4	759.1	763.9	-1.6	0.5	32	68	1
1271	2018.07.09	19.4	30.6	763.1	767.5	764.6	769	-1.6	0.3	31	64	1
1272	2018.07.08	18.3	29.4	767.5	769.9	769	771.5	-1.2	1.3	27	70	1
1273	2018.07.07	21.1	27.2	764.9	769	766.6	770.6	-1.2	2	37	61	1
1274	2018.07.06	27.2	30	761.6	764.4	763.3	765.9	-1.5	1.2	49	79	1
1275	2018.07.05	27.2	32.8	764.4	767.9	766.1	769.6	-1.6	0.6	52	82	1
1276	2018.07.04	27.2	32.8	765.7	767.2	767.1	768.7	-0.5	1.2	49	82	1
1277	2018.07.03	27.8	35.6	762.6	765.4	764.3	767.1	-0.8	1.3	52	82	1
1278	2018.07.02	26.1	35	761.1	762.6	762.7	764.2	-0.5	1.5	47	88	1
1279	2018.07.01	25	33.3	760.6	762.6	762.2	764.3	-0.8	1.2	49	82	1
1280	2018.06.30	22.8	32.2	761.4	762.9	763.1	764.5	-0.6	1.1	45	90	1
1281	2018.06.29	23.3	32.2	758.5	761.4	760.3	763	-0.5	1.6	42	74	1
1282	2018.06.28	23.9	31.1	755.2	758.3	757	760	-1.1	1.8	48	90	1
1283	2018.06.27	21.7	27.2	757	763.1	758.5	764.7	-1.7	0	71	85	1
1284	2018.06.26	18.9	28.3	764.4	765.9	765.9	767.5	-0.8	0.8	44	61	1
1285	2018.06.25	21.7	28.9	758.3	764.2	759.8	765.7	-0.2	1.5	48	94	1
1286	2018.06.24	22.2	32.2	756.1	758.5	757.7	760.2	-0.5	2	45	91	1
1287	2018.06.23	19.4	26.7	754.8	756.8	756.4	758.4	-1.3	0.9	69	93	1
1288	2018.06.22	20	24.4	755.8	757.8	757.4	759.4	-0.3	1.2	74	87	1
1289	2018.06.21	22.8	28.3	753.7	755.8	755.2	757.5	-1.1	0.8	61	87	1
1290	2018.06.20	23.3	28.9	755	757.8	756.7	759.3	-1.3	0.8	53	85	1
1291	2018.06.19	26.1	33.9	755.5	757.3	757	758.8	-0.8	0.7	50	82	1
1292	2018.06.18	23.3	31.7	757.3	762.1	758.9	763.8	-1.8	0.5	57	85	1
1293	2018.06.17	23.3	30.6	761.1	762.9	762.7	764.5	-0.8	1	53	74	1
1294	2018.06.16	18.3	31.1	760.3	762.4	762.1	764.1	-1.1	0.8	33	73	1
1295	2018.06.15	21.1	28.9	759.6	760.9	761.1	762.5	-0.8	1.1	27	57	1
1296	2018.06.14	23.9	30	756.5	759.8	758.1	761.4	-1.3	1.5	25	74	1
1297	2018.06.13	20	28.3	756.5	762.1	758	763.6	-1.5	0	65	87	1
1298	2018.06.12	14.4	24.4	763.1	766.2	764.6	767.7	-1.2	0.5	48	87	1
1299	2018.06.11	16.7	18.9	757.8	764.9	759.4	766.4	-0.3	1.8	73	90	1
1300	2018.06.10	19.4	26.7	757.6	760.9	759.1	762.5	-1.8	0.8	69	90	1
1301	2018.06.09	21.7	28.3	760.3	763.4	762.1	765	-1.5	1.1	63	91	1
1302	2018.06.08	18.3	27.8	763.1	765.1	764.8	766.6	-1.3	1.3	60	84	1
1303	2018.06.07	17.2	25.6	760.6	763.6	762.3	765.3	-0.8	1.5	52	76	1
1304	2018.06.06	18.3	25	754.3	760.6	755.8	762.1	-0.2	1.5	45	70	1
1305	2018.06.05	16.7	27.2	752.5	756.3	754.2	757.9	-1.8	1.3	37	78	1
1306	2018.06.04	13.9	25	754	757	755.7	758.5	-1.2	1.3	45	87	1
1307	2018.06.03	14.4	23.9	754.5	757.6	756.2	759.1	-0.3	1.1	84	90	1
1308	2018.06.02	23.3	29.4	753.7	755	755.2	756.6	-0.8	0.8	61	85	1
1309	2018.06.01	22.2	30.6	754	756.5	755.5	758.2	-1.3	0.8	53	91	1
1310	2018.05.31	21.1	29.4	756.8	760.1	758.5	761.7	-1.5	0.3	65	90	1
1311	2018.05.30	22.2	26.1	760.1	762.1	761.7	763.6	-1.5	0.9	69	87	1
1312	2018.05.29	20.6	26.7	759.8	761.1	761.4	762.7	-1.1	1.1	67	93	1
1313	2018.05.28	17.8	21.7	761.1	762.6	762.7	764.2	-1.2	0.8	79	91	1
1314	2018.05.27	23.3	28.9	757.3	760.9	758.8	762.5	-0.3	1.5	67	88	1
1315	2018.05.26	22.8	30	756.1	757.6	757.6	759.3	-1	1.3	57	84	1
1316	2018.05.25	18.3	29.4	757.8	763.6	759.5	765.1	-1.8	0.3	51	84	1
1317	2018.05.24	18.3	30	763.1	765.1	764.8	766.7	-1	1.7	20	81	1
1318	2018.05.23	20	27.8	758.3	762.6	759.8	764.2	-1.8	1.3	44	93	1
1319	2018.05.22	18.9	22.8	759.8	763.9	761.5	765.6	-1.3	0.3	74	90	1
1320	2018.05.21	20.6	27.2	762.4	765.7	763.9	767.3	-1.1	1.5	47	76	1
1321	2018.05.20	21.1	31.7	760.1	761.6	761.6	763.3	-0.8	1.1	42	90	1
1322	2018.05.19	14.4	22.2	761.6	765.7	763.2	767.2	-1.3	0	84	90	1
1323	2018.05.18	14.4	20	761.6	765.9	763.2	767.5	-0.5	1.5	84	91	1
1324	2018.05.17	19.4	20	758.5	762.1	760.1	763.6	-0.6	1.1	87	93	1
1325	2018.05.16	19.4	23.3	759.6	761.1	761.2	762.7	-0.8	0.8	82	91	1
1326	2018.05.15	18.9	31.1	755.8	760.3	757.3	761.8	-1.5	3.5	57	87	1
1327	2018.05.14	16.7	26.7	759.1	761.1	760.8	762.8	-1.8	1.3	67	90	1
1328	2018.05.13	17.2	20.6	761.1	762.4	762.7	763.9	-0.5	0.8	84	90	1
1329	2018.05.12	20.6	31.1	757.8	762.1	759.4	763.8	-2.2	3.1	46	79	1
1330	2018.05.11	17.2	28.3	758.3	762.1	759.9	763.7	-0.8	1.5	40	84	1
1331	2018.05.10	16.1	27.2	755.5	760.9	757.2	762.5	-2	1.3	54	84	1
1332	2018.05.09	14.4	25.6	762.1	764.9	763.6	766.5	-1.5	0.3	33	78	1
1333	2018.05.08	15	25	764.4	766.4	765.9	768.1	-1	1.3	33	78	1
1334	2018.05.07	15.6	24.4	759.3	763.9	760.9	765.4	-0.6	1.7	40	78	1
1335	2018.05.06	15.6	21.1	756.5	761.6	758.2	763.3	-1.5	1.3	59	75	1
1336	2018.05.05	17.2	23.9	759.8	764.2	761.3	765.7	-0.8	1.6	33	60	1
1337	2018.05.04	21.1	31.7	756.5	760.9	758.2	762.4	-2	1.5	36	71	1
1338	2018.05.03	19.4	32.2	759.8	763.4	761.4	764.8	-1.8	1	34	59	1
1339	2018.05.02	13.9	32.2	761.6	765.1	763.1	766.6	-1.6	1.2	14	69	1
1340	2018.05.01	10	27.8	762.9	765.4	764.5	767	-1.5	1.5	16	64	1
1341	2018.04.30	6.1	22.8	762.1	766.2	763.6	767.7	-2	0.8	15	63	0
1342	2018.04.29	8.3	13.3	760.1	764.9	761.6	766.6	-0.3	2	37	54	0
1343	2018.04.28	12.2	24.4	752.5	758.1	754.2	759.7	-1.8	3.6	24	90	1
1344	2018.04.27	12.8	16.7	754	755.5	755.5	757	-1	0.8	64	90	1
1345	2018.04.26	11.7	22.2	754	757.3	755.7	758.9	-0.7	2.1	27	67	1
1346	2018.04.25	13.3	18.9	752.2	757.6	753.9	759.1	-2.2	0.8	70	93	1
1347	2018.04.24	12.8	17.2	759.8	769	761.3	770.6	-2	-0.5	44	90	1
1348	2018.04.23	11.1	19.4	769	771.5	770.7	773	-1.5	0.9	36	64	1
1349	2018.04.22	9.4	19.4	768.7	771	770.3	772.6	-1.3	1.3	42	68	1
1350	2018.04.21	6.1	15.6	769.2	773	770.8	774.5	-2.3	1.8	31	53	0
1351	2018.04.20	4.4	15.6	765.1	769.7	766.7	771.4	-0.5	1.8	27	47	0
1352	2018.04.19	7.2	13.3	751.2	764.4	752.8	766	-2.3	3.3	35	77	1
1353	2018.04.18	2.8	16.1	753.5	759.1	755.2	760.8	-1.6	1	41	57	0
1354	2018.04.17	5	8.9	754.5	757.3	756.1	759	-1.5	1.8	37	47	0
1355	2018.04.16	8.9	16.7	746.6	753.7	748.3	755.4	-3.6	1.8	43	93	1
1356	2018.04.15	8.9	19.4	754.8	762.1	756.4	763.7	-3.5	1.8	66	90	1
1357	2018.04.14	18.9	28.3	756.8	759.8	758.5	761.5	-1.5	1.3	37	63	1
1358	2018.04.13	16.1	29.4	757	760.3	758.7	762.1	-1.8	1.2	25	56	1
1359	2018.04.12	7.8	25.6	756.3	764.2	757.9	765.7	-4.4	1.3	25	66	1
1360	2018.04.11	6.1	13.9	762.4	766.2	763.9	767.8	-1.7	0.7	35	55	0
1361	2018.04.10	3.3	12.2	764.2	766.4	765.8	768.1	-1.2	1.3	28	86	0
1362	2018.04.09	4.4	7.2	764.2	766.7	765.7	768.3	-1.6	2.3	33	85	0
1363	2018.04.08	1.7	10	758.3	762.9	759.9	764.3	-0.8	2	26	48	0
1364	2018.04.07	3.3	15.6	753.5	759.6	755	761.2	-0.3	2.5	31	62	0
1365	2018.04.06	7.2	22.2	752.2	763.9	754	765.4	-3	0	19	74	1
1366	2018.04.05	2.8	13.3	762.9	766.4	764.4	768.1	-1.7	1.8	24	42	0
1367	2018.04.04	7.2	21.1	748.4	761.4	749.9	762.8	-3	4	25	86	1
1368	2018.04.03	7.2	11.7	756.1	764.6	757.7	766.3	-2.3	-0.5	68	83	1
1369	2018.04.02	5.6	11.1	759.1	765.1	760.6	766.9	-2.3	2.3	64	82	1
1370	2018.04.01	10	18.9	760.9	762.4	762.5	763.9	-1.3	0.7	40	59	1
1371	2018.03.31	5	15.6	763.1	769.7	764.8	771.2	-2.5	2	28	55	0
1372	2018.03.30	8.9	22.2	753.2	763.9	754.8	765.5	-1.3	3.5	49	70	1
1373	2018.03.29	8.9	24.4	754	760.6	755.5	762.2	-2.8	0.5	49	89	1
1374	2018.03.28	6.1	13.9	760.6	764.6	762.1	766.3	-2	0.7	62	86	1
1375	2018.03.27	2.2	7.2	766.2	776.8	767.8	778.4	-3	0	52	82	0
1376	2018.03.26	1.7	8.9	775.3	778.1	777	779.8	-1.1	1.5	40	82	0
1377	2018.03.25	1.7	7.8	763.9	774.3	765.6	776	0	2.6	44	70	0
1378	2018.03.24	1.1	10.6	763.1	766.4	764.7	768.1	-1.8	0.8	31	56	0
1379	2018.03.23	2.2	10	762.9	765.1	764.5	766.9	-1.2	1.2	26	50	0
1380	2018.03.22	1.7	8.3	756.8	763.1	758.4	764.8	-0.3	2.3	34	82	0
1381	2018.03.21	0	1.7	751.2	756.1	752.8	757.6	-1.5	2	82	100	0
1382	2018.03.20	0.6	5.6	753.7	757.6	755.2	759.3	-2.1	0.7	70	92	0
1383	2018.03.19	3.3	13.3	756.8	758.5	758.3	760.2	-1	0.9	34	73	0
1384	2018.03.18	2.2	14.4	757.6	761.1	759.1	762.7	-1.6	2	20	65	0
1385	2018.03.17	1.1	7.2	756.3	762.1	757.8	763.6	-2.5	0.5	40	68	0
1386	2018.03.16	2.8	7.8	754.3	761.8	755.9	763.6	0	2.8	26	54	0
1387	2018.03.15	0	11.7	751	756.5	752.5	758.2	-2	1.5	26	56	0
1388	2018.03.14	0.6	5.6	754.3	757.6	755.8	759	-1.3	1.5	30	54	0
1389	2018.03.13	0.6	7.2	754.8	757.6	756.4	759.1	-0.9	1.5	29	85	0
1390	2018.03.12	1.7	6.7	755.2	761.6	756.9	763.1	-1.8	0.6	47	86	0
1391	2018.03.11	0	10.6	761.8	764.6	763.6	766.2	-1.7	1.2	29	59	0
1392	2018.03.10	0	8.3	759.6	762.9	761.2	764.4	-2	1.5	35	65	0
1393	2018.03.09	1.1	6.7	756.8	761.1	758.3	762.6	-0.2	1.6	34	52	0
1394	2018.03.08	1.7	6.7	755	757.8	756.5	759.3	-1.5	1.5	31	57	0
1395	2018.03.07	1.7	10.6	752.2	756.8	753.8	758.3	-1.8	2.2	47	97	1
1396	2018.03.06	1.1	7.2	757.3	763.1	758.8	764.8	-1.7	0.5	49	97	0
1397	2018.03.05	-0.6	9.4	762.1	765.7	763.8	767.2	-1.5	0.8	27	45	0
1398	2018.03.04	1.7	10.6	764.4	767.2	766.1	768.7	-1.5	0.7	24	64	0
1399	2018.03.03	2.8	11.1	760.9	766.2	762.3	767.7	-0.3	1.8	39	55	0
1400	2018.03.02	4.4	11.1	747.1	760.1	748.6	761.8	0	3.3	35	65	0
1401	2018.03.01	10	12.8	747.1	758.3	748.7	759.8	-2.6	0.2	77	96	1
1402	2018.02.28	7.2	16.1	758.1	766.2	759.7	767.8	-2.1	-0.5	43	69	1
1403	2018.02.27	3.9	13.9	767.2	772.5	768.7	774.1	-2.2	1.3	28	73	0
1404	2018.02.26	6.1	11.1	761.8	768.4	763.5	769.9	0	2.1	47	100	1
1405	2018.02.25	8.9	11.7	759.3	762.9	761	764.6	-1.6	1	92	100	1
1406	2018.02.24	8.9	11.7	763.6	766.4	765.2	768	-1.5	0.8	89	100	1
1407	2018.02.23	5	8.3	767.7	775.8	769.4	777.3	-2.9	0.5	86	97	1
1408	2018.02.22	6.7	18.9	769.9	775.3	771.5	777.1	-0.8	1.5	57	92	1
1409	2018.02.21	13.9	26.7	766.7	769.2	768.3	770.9	-1.5	1.5	54	96	1
1410	2018.02.20	10	25	767.5	770.2	769	771.8	-1.8	1	47	100	1
1411	2018.02.19	4.4	9.4	769.2	773	770.9	774.5	-1.7	0.2	77	97	1
1412	2018.02.18	1.1	10.6	761.6	772.8	763.2	774.4	-1	3.5	44	97	1
1413	2018.02.17	1.1	6.1	762.6	769.9	764.2	771.6	-3.2	2.1	49	96	0
1414	2018.02.16	6.1	18.9	751.7	765.4	753.1	767.2	-1.3	4.3	54	100	1
1415	2018.02.15	9.4	20.6	753	761.6	754.6	763.3	-2.3	0.3	68	97	1
1416	2018.02.14	1.7	11.7	763.1	774.3	764.7	776	-2.5	-0.4	61	89	1
1417	2018.02.13	0.6	5	776.3	781.4	778	782.8	-2	1.3	36	68	0
1418	2018.02.12	4.4	16.7	759.8	777.4	761.5	778.9	1.3	3.8	41	93	1
1419	2018.02.11	9.4	18.9	756.8	761.6	758.4	763.2	-2	0.9	93	100	1
1420	2018.02.10	3.9	10	761.8	769	763.3	770.5	-2.3	-0.2	79	100	1
1421	2018.02.09	-2.2	7.8	769.7	774.5	771.4	776.2	-2.3	1.1	55	78	0
1422	2018.02.08	-2.8	2.8	766.9	773.2	768.6	774.8	-1.3	2.8	39	67	0
1423	2018.02.07	0.6	6.1	759.6	772.3	761.2	773.9	-4.6	3	70	97	0
1424	2018.02.06	-1.7	5	767.7	772.8	769.3	774.2	-0.5	1.6	51	79	0
1425	2018.02.05	-1.1	2.8	755.5	768.4	757.1	770	-0.3	4.8	39	97	0
1426	2018.02.04	1.1	2.8	754.5	768.7	756.1	770.2	-4.3	0.5	40	96	0
1427	2018.02.03	-7.2	1.1	769.7	774.1	771.2	775.6	-2.1	0.8	28	54	0
1428	2018.02.02	-5.6	5.6	758.8	772	760.3	773.5	0.5	3.6	34	89	0
1429	2018.02.01	4.4	11.1	756.8	760.9	758.4	762.4	-1.6	0.3	39	64	0
1430	2018.01.31	-6.1	3.3	761.8	770.2	763.4	771.7	-3.3	0.7	35	52	0
1431	2018.01.30	-3.9	4.4	760.3	769	761.8	770.6	-1.1	2.9	36	78	0
1432	2018.01.29	6.1	8.9	761.4	765.4	762.9	767	-1.6	0.2	51	89	1
1433	2018.01.28	8.9	13.3	765.4	767.5	767.1	769	-1.6	0.6	60	100	1
1434	2018.01.27	3.9	16.7	768.2	774.1	769.7	775.6	-2.4	0	39	66	1
1435	2018.01.26	-2.2	8.9	775.3	778.6	777	780.3	-1.8	1.3	42	78	0
1436	2018.01.25	0.6	5	766.9	775.6	768.4	777.1	0	2.5	35	59	0
1437	2018.01.24	2.8	8.3	757.6	765.9	759.1	767.5	0.5	2.3	45	60	0
1438	2018.01.23	10	18.9	749.7	757.8	751.2	759.5	-3.3	3.3	40	96	1
1439	2018.01.22	10	15.6	760.1	764.4	761.7	766	-2	0.8	51	74	1
1440	2018.01.21	1.1	13.9	763.1	766.2	764.7	767.8	-1.6	1.2	47	89	1
1441	2018.01.20	-2.2	15.6	760.1	762.6	761.6	764.3	-1.5	1.3	33	79	0
1442	2018.01.19	-2.2	10	761.4	764.2	763.1	765.8	-2.1	1	24	69	0
1443	2018.01.18	-7.2	8.3	761.4	767.7	763	769.1	-2.5	1.2	15	57	0
1444	2018.01.17	-5.6	1.7	768.7	771	770.2	772.6	-1.3	1.2	46	85	0
1445	2018.01.16	-1.1	5	769.2	773	770.9	774.7	-1.8	0.8	53	89	0
1446	2018.01.15	-7.8	0	772.8	776.8	774.3	778.4	-2	0.7	52	85	0
1447	2018.01.14	-8.3	-2.2	774.1	778.3	775.6	779.9	-1.5	1.8	27	56	0
1448	2018.01.13	-4.4	15	744.4	772.3	746	773.8	-4.2	6.3	46	100	0
1449	2018.01.12	14.4	17.2	748.6	761.8	750.1	763.4	-3.3	-0.6	93	100	1
1450	2018.01.11	4.4	15	763.9	770.5	765.6	772	-2.3	0.6	64	93	1
1451	2018.01.10	-0.6	5.6	770.5	773.2	772.1	775	-1.5	1.5	62	85	0
1452	2018.01.09	0	10	763.1	770.2	764.8	771.7	-0.5	1.8	44	100	1
1453	2018.01.08	-6.7	3.9	763.1	770.2	764.7	771.8	-2.1	-0.5	34	93	0
1454	2018.01.07	-12.2	-5	772.3	778.3	773.9	779.9	-2.7	1	32	53	0
1455	2018.01.06	-11.7	-7.2	767.9	774.8	769.6	776.5	-1.3	2.1	29	44	0
1456	2018.01.05	-10.6	-6.7	758.8	767.5	760.2	769	-0.3	2.3	29	44	0
1457	2018.01.04	-7.8	-2.8	751.7	758.3	753.1	759.9	-3.3	2.3	43	85	0
1458	2018.01.03	-9.4	1.1	761.1	770.5	762.7	772	-3.3	-0.2	27	80	0
1459	2018.01.02	-10.6	-3.3	771.5	776.5	773	778.1	-2.4	0.8	29	52	0
1460	2018.01.01	-10	-4.4	771.5	774.3	773.1	775.7	-1.3	1.8	35	61	0
1461	2017.12.31	-8.3	-5	766.7	771.2	768.3	772.9	-0.8	1.8	38	54	0
1462	2017.12.30	-5.6	-0.6	759.8	766.9	761.3	768.6	-2.8	2.6	40	89	0
1463	2017.12.29	-6.7	-0.6	767.7	772.3	769.1	773.8	-2	1	34	52	0
1464	2017.12.28	-8.9	-4.4	773.8	778.1	775.3	779.6	-1.8	0.9	32	49	0
1465	2017.12.27	-6.1	0.6	772.3	775.8	773.8	777.4	-0.8	1.8	35	56	0
1466	2017.12.26	-1.1	2.8	769.7	773.2	771.4	774.8	-1.5	1.5	30	40	0
1467	2017.12.25	-0.6	4.4	755.8	769.2	757.4	770.9	-3.5	4.3	28	82	0
1468	2017.12.24	3.9	7.2	759.3	766.2	760.8	767.7	-2.6	3.3	61	83	1
1469	2017.12.23	7.8	17.2	751.9	761.6	753.7	763.1	-2.8	3.9	73	89	1
1470	2017.12.22	2.8	13.3	762.9	766.4	764.6	768.1	-2.8	0.5	49	76	1
1471	2017.12.21	1.1	6.7	762.6	767.5	764.3	769	-1	1.8	37	67	0
1472	2017.12.20	4.4	11.7	756.5	762.1	758.2	763.7	-1.3	1.8	36	77	0
1473	2017.12.19	5	16.1	757	761.1	758.5	762.7	-2.8	0.8	38	86	1
1474	2017.12.18	3.9	12.2	760.3	763.9	762	765.5	-2.5	0.5	48	82	1
1475	2017.12.17	0	9.4	764.6	766.9	766.3	768.5	-1.3	0.8	50	79	0
1476	2017.12.16	-2.8	8.3	761.6	765.1	763.2	766.8	-1.8	1.6	39	85	0
1477	2017.12.15	-2.8	-0.6	759.1	763.6	760.6	765.3	-3.1	1	45	89	0
1478	2017.12.14	0.6	6.7	748.2	763.1	749.7	764.6	-2.4	3.8	36	50	0
1479	2017.12.13	-5	1.7	751.9	757.3	753.4	758.8	-2.1	1.3	29	40	0
1480	2017.12.12	-2.8	8.9	748.4	756.1	750.1	757.5	-3.3	2.5	40	73	0
1481	2017.12.11	2.2	8.9	758.5	763.1	760.1	764.7	-2	1	41	76	0
1482	2017.12.10	-0.6	5	757.3	762.4	758.8	763.9	-0.6	2.3	47	92	0
1483	2017.12.09	0	3.3	755.5	759.8	757	761.3	-2.2	0.7	76	92	0
1484	2017.12.08	2.8	5.6	760.6	763.9	762.1	765.6	-1.3	0.5	43	82	0
1485	2017.12.07	5.6	8.9	761.4	763.9	763	765.5	-1.8	0.8	33	51	0
1486	2017.12.06	5.6	10.6	760.1	764.2	761.7	765.8	-1.6	2.3	29	50	0
1487	2017.12.05	7.2	15.6	758.3	767.9	759.9	769.6	-3	-0.5	81	97	1
1488	2017.12.04	3.3	12.2	768.4	771.5	769.9	773.2	-1	1.3	47	89	1
1489	2017.12.03	5.6	12.8	764.9	767.7	766.6	769.2	-1.5	1	44	89	1
1490	2017.12.02	3.3	11.1	765.9	767.9	767.5	769.6	-1.5	0.3	55	86	1
1491	2017.12.01	7.2	13.3	761.6	767.9	763.2	769.4	-0.7	2.2	44	93	1
1492	2017.11.30	6.1	14.4	761.4	768.2	763	769.9	-2.9	0.7	54	86	1
1493	2017.11.29	6.1	20	764.6	767.5	766.3	769	-1.3	1.8	32	86	1
1494	2017.11.28	3.9	15.6	767.2	769.9	768.7	771.7	-1.1	1.3	38	82	1
1495	2017.11.27	3.9	16.1	762.4	766.7	763.9	768.2	-1	1.5	34	70	0
1496	2017.11.26	7.8	12.2	757.8	762.4	759.5	764	-0.7	1.8	40	58	0
1497	2017.11.25	3.9	15.6	753.7	758.3	755.3	760	-1.8	1.5	44	86	1
1498	2017.11.24	0.6	11.1	759.6	762.9	761.1	764.5	-1.8	0.3	43	85	0
1499	2017.11.23	0	7.2	762.1	765.4	763.6	767.1	-2.3	0.5	39	69	0
1500	2017.11.22	4.4	14.4	758.3	765.4	760	766.9	-1.8	1.8	43	92	1
1501	2017.11.21	5	16.1	761.1	764.9	762.7	766.6	-2.4	0.5	39	72	1
1502	2017.11.20	3.9	11.1	760.6	766.2	762.2	767.7	-1.1	2.1	30	56	0
1503	2017.11.19	7.2	17.8	743.4	759.1	745	760.6	-2.2	6.3	43	81	1
1504	2017.11.18	3.9	17.2	747.1	762.4	748.6	764	-4	-1.2	46	86	1
1505	2017.11.17	5.6	11.7	763.4	766.2	765	767.8	-1.3	1.1	38	68	0
1506	2017.11.16	6.7	16.7	757.3	763.1	758.8	764.7	-1.6	3.3	38	83	1
1507	2017.11.15	2.8	11.7	761.8	767.7	763.6	769.3	-2.6	0.5	55	79	1
1508	2017.11.14	5	10.6	767.9	770.2	769.6	771.8	-1.8	0.7	50	89	1
1509	2017.11.13	5	10.6	767.9	769.2	769.5	770.7	-1.3	0.8	66	96	1
1510	2017.11.12	0	8.3	770.2	773	771.8	774.7	-1.6	0.5	46	76	0
1511	2017.11.11	-3.3	3.3	773.8	776.8	775.4	778.4	-2	0.7	33	52	0
1512	2017.11.10	1.1	9.4	761.8	774.5	763.3	776.2	0	3.1	35	97	0
1513	2017.11.09	7.2	13.3	761.8	765.9	763.6	767.5	-2	0	77	93	1
1514	2017.11.08	5.6	9.4	764.6	766.9	766.3	768.4	-0.5	1.8	74	92	1
1515	2017.11.07	6.1	12.2	763.4	765.7	764.9	767.2	-1.5	1.1	66	93	1
1516	2017.11.06	16.1	20.6	758.8	763.1	760.3	764.8	-1.3	2	72	93	1
1517	2017.11.05	12.8	16.1	762.4	766.4	763.9	767.9	-1.2	0	96	100	1
1518	2017.11.04	10	13.9	766.4	769.2	767.9	770.8	-2	1.3	60	97	1
1519	2017.11.03	15	24.4	761.1	765.1	762.7	766.8	-1.5	2	58	96	1
1520	2017.11.02	11.7	22.8	764.6	766.7	766.1	768.4	-1.3	0.5	62	93	1
1521	2017.11.01	7.8	17.2	765.4	767.5	767	769	-1.6	0.8	64	87	1
1522	2017.10.31	7.8	16.7	759.3	765.9	760.9	767.5	-0.6	1.7	31	77	1
1523	2017.10.30	7.8	15	742.6	758.1	744.1	759.7	0	4	35	86	1
1524	2017.10.29	8.9	20	741.3	754.3	743	755.8	-3	-0.3	86	93	1
1525	2017.10.28	12.2	21.7	756.1	761.1	757.6	762.6	-1.7	-0.2	49	81	1
1526	2017.10.27	6.1	20	761.4	762.9	763	764.5	-1.1	0.8	44	83	1
1527	2017.10.26	10	16.1	755.5	760.9	757	762.6	-0.6	2	34	66	1
1528	2017.10.25	11.1	17.2	753.2	755.8	754.9	757.3	-1.5	1.1	41	62	1
1529	2017.10.24	16.1	22.2	753.7	755.2	755.2	757	-2.3	1.3	57	93	1
1530	2017.10.23	16.1	24.4	756.3	767.7	757.8	769.3	-3.3	-0.5	62	100	1
1531	2017.10.22	12.8	24.4	768.2	770.5	769.7	772	-1.3	0.7	48	87	1
1532	2017.10.21	12.2	24.4	767.5	769.7	769	771.4	-1	1.2	30	87	1
1533	2017.10.20	13.3	24.4	764.6	766.9	766.2	768.5	-1	1.3	35	93	1
1534	2017.10.19	10	21.7	764.2	768.2	765.9	769.7	-2	0.4	47	93	1
1535	2017.10.18	8.3	20.6	768.2	770.5	769.9	772.2	-1.3	0.7	44	80	1
1536	2017.10.17	8.9	16.7	767.5	770.5	769	772	-1.5	1.5	31	74	1
1537	2017.10.16	12.8	21.7	758.5	766.7	760	768.3	0	2	34	90	1
1538	2017.10.15	17.8	25.6	756.8	764.4	758.4	765.9	-2.8	-0.3	69	100	1
1539	2017.10.14	17.2	20.6	764.9	767.5	766.5	769	-1.3	0.5	78	97	1
1540	2017.10.13	16.1	18.3	767.9	769.9	769.5	771.5	-1.2	0.5	67	97	1
1541	2017.10.12	16.1	19.4	762.1	768.7	763.7	770.3	0.3	1.8	72	100	1
1542	2017.10.11	19.4	23.9	760.3	761.8	762.1	763.6	-0.8	1.1	88	100	1
1543	2017.10.10	22.8	29.4	760.9	762.9	762.4	764.6	-0.8	1	57	94	1
1544	2017.10.09	23.3	29.4	756.8	760.1	758.4	761.7	-1.1	1.6	72	97	1
1545	2017.10.08	23.9	27.8	758.8	760.3	760.5	761.8	-1	0.8	74	96	1
1546	2017.10.07	20	27.8	760.6	763.1	762.1	764.8	-1.3	0.3	58	88	1
1547	2017.10.06	18.3	27.2	761.4	763.6	763	765.3	-1.2	1	54	90	1
1548	2017.10.05	15.6	26.7	763.4	766.7	764.9	768.3	-1.5	0.3	45	84	1
1549	2017.10.04	14.4	24.4	767.7	773.8	769.2	775.4	-2.1	0	56	93	1
1550	2017.10.03	13.3	22.8	773	775.8	774.7	777.4	-1.3	1.6	41	93	1
1551	2017.10.02	11.7	22.8	769.5	772.3	770.9	774	-1	1.1	44	89	1
1552	2017.10.01	11.1	20.6	768.2	771	769.8	772.6	-1.5	0.6	44	72	1
1553	2017.09.30	14.4	19.4	763.1	769.5	764.6	771.1	0	1.5	41	67	1
1554	2017.09.29	15.6	23.3	761.4	763.6	763	765.1	-1.2	1.5	36	65	1
1555	2017.09.28	20.6	26.7	754.5	760.3	756.1	762	-0.3	1.5	31	79	1
1556	2017.09.27	23.3	32.8	754.8	758.3	756.3	759.8	-1.5	0.3	49	85	1
1557	2017.09.26	21.7	28.3	758.8	761.1	760.3	762.7	-1.3	0.8	63	87	1
1558	2017.09.25	22.2	32.2	760.1	761.8	761.6	763.6	-0.9	0.8	47	91	1
1559	2017.09.24	20	32.2	761.1	763.1	762.8	764.7	-1.1	1	42	79	1
1560	2017.09.23	18.9	31.1	761.1	762.9	762.7	764.6	-0.8	1	36	84	1
1561	2017.09.22	22.2	28.3	760.1	762.4	761.8	764.1	-1.3	1	56	82	1
1562	2017.09.21	20.6	30	760.3	762.1	762	763.6	-0.7	1.5	48	88	1
1563	2017.09.20	21.7	30.6	758.1	760.1	759.7	761.6	-1	1.2	45	88	1
1564	2017.09.19	21.1	28.3	757.8	760.9	759.4	762.4	-1.3	0.5	59	90	1
1565	2017.09.18	21.7	24.4	761.4	762.6	763	764.3	-0.7	0.2	79	94	1
1566	2017.09.17	20.6	27.8	762.1	764.6	763.7	766.1	-1.1	1.2	65	97	1
1567	2017.09.16	20.6	28.3	762.9	764.2	764.6	765.8	-0.8	0.8	55	90	1
1568	2017.09.15	20	28.3	760.1	763.1	761.7	764.7	-0.8	1.2	55	87	1
1569	2017.09.14	20.6	26.7	756.8	759.8	758.5	761.4	-0.9	1.3	58	93	1
1570	2017.09.13	20	26.1	756.3	758.5	757.9	760.2	-1.3	0.7	65	97	1
1571	2017.09.12	17.2	25.6	759.1	763.4	760.6	765.1	-1.8	0.2	39	81	1
1572	2017.09.11	14.4	22.8	764.4	769.2	766	770.7	-2.4	0.2	48	84	1
1573	2017.09.10	12.8	22.8	769	770.8	770.6	772.4	-0.9	1	48	78	1
1574	2017.09.09	15	22.2	766.2	769.2	767.7	770.9	-0.9	1.5	44	81	1
1575	2017.09.08	13.3	24.4	763.4	766.2	765	767.7	-0.4	1.6	42	87	1
1576	2017.09.07	15.6	23.3	758.5	762.6	760.2	764.1	0	1.5	41	97	1
1577	2017.09.06	16.7	21.1	755.2	758.5	757	760.2	-1.3	1.8	87	93	1
1578	2017.09.05	21.1	30	754.3	756.8	755.8	758.3	-1.8	1.8	51	93	1
1579	2017.09.04	16.7	27.8	757	761.8	758.5	763.3	-1.8	0.7	49	90	1
1580	2017.09.03	17.2	25.6	758.8	761.1	760.5	762.6	-1.1	1.3	48	100	1
1581	2017.09.02	14.4	17.8	760.9	764.4	762.4	766.1	-1.5	0.5	70	100	1
1582	2017.09.01	17.2	22.2	761.1	765.1	762.7	766.9	-0.9	1.8	50	68	1
1583	2017.08.31	20	28.9	758.5	760.6	760.3	762.3	-1.3	1.5	49	93	1
1584	2017.08.30	17.2	25.6	760.1	761.6	761.8	763.3	-0.8	1.3	52	90	1
1585	2017.08.29	18.3	20	760.3	764.6	761.9	766.2	-1.3	0.6	70	97	1
1586	2017.08.28	18.3	24.4	765.1	766.4	766.7	767.9	-0.7	0.3	52	81	1
1587	2017.08.27	18.9	26.1	764.9	766.9	766.6	768.5	-1	1.3	42	84	1
1588	2017.08.26	19.4	26.7	765.4	766.9	767	768.5	-0.8	0.8	45	81	1
1589	2017.08.25	19.4	26.7	761.1	765.4	762.7	766.9	-0.3	1.6	47	87	1
1590	2017.08.24	22.2	27.8	758.3	760.1	759.8	761.8	-0.5	1.1	35	69	1
1591	2017.08.23	23.9	29.4	755.5	758.1	757.3	759.7	-1.1	1.1	45	74	1
1592	2017.08.22	24.4	33.3	755.8	762.9	757.3	764.4	-2.8	0.2	52	97	1
1593	2017.08.21	24.4	31.7	763.4	765.7	764.9	767.3	-1.2	0.6	65	88	1
1594	2017.08.20	21.7	30.6	760.3	765.1	762	766.8	-0.8	2	39	77	1
1595	2017.08.19	23.9	32.2	756.5	759.6	758.2	761.1	-1.2	1.8	45	97	1
1596	2017.08.18	25.6	32.8	753.7	757.6	755.2	759.1	-1.8	1.8	70	93	1
1597	2017.08.17	25	30.6	758.5	761.1	760	762.8	-1.3	0.8	72	94	1
1598	2017.08.16	22.8	32.2	758.8	761.1	760.3	762.8	-0.7	1.3	50	100	1
1599	2017.08.15	23.9	26.7	757.3	758.5	759	760.1	-0.7	0.9	82	96	1
1600	2017.08.14	22.2	26.7	759.1	761.6	760.8	763.1	-1	0.7	67	91	1
1601	2017.08.13	21.7	29.4	758.1	761.4	759.6	762.9	-0.6	1.5	46	94	1
1602	2017.08.12	22.2	29.4	756.8	759.3	758.5	760.9	-1.3	0.8	72	97	1
1603	2017.08.11	21.7	27.8	760.1	764.4	761.8	766.1	-1.7	0	66	96	1
1604	2017.08.10	20.6	28.3	764.6	766.9	766.1	768.4	-1	0.7	48	82	1
1605	2017.08.09	18.9	28.3	764.2	766.4	765.8	768	-0.6	1.3	34	87	1
1606	2017.08.08	21.1	26.1	758.3	763.6	759.8	765.3	-0.2	1.3	50	97	1
1607	2017.08.07	21.7	23.3	757.8	762.9	759.4	764.5	-2	0.7	74	97	1
1608	2017.08.06	20	27.2	762.4	764.2	763.9	765.7	-0.8	1.2	49	71	1
1609	2017.08.05	22.8	26.7	756.5	762.1	758	763.6	-0.5	2.1	42	82	1
1610	2017.08.04	23.9	31.7	757	761.1	758.8	762.8	-1.6	0	55	84	1
1611	2017.08.03	22.8	31.1	761.1	763.4	762.7	765.1	-1.3	1.3	55	91	1
1612	2017.08.02	24.4	31.7	760.3	762.4	762	763.9	-1.3	1.3	47	85	1
1613	2017.08.01	21.7	32.2	760.6	762.6	762.2	764.3	-1.2	1	42	90	1
1614	2017.07.31	19.4	31.1	761.6	763.6	763.1	765.2	-1	0.8	40	87	1
1615	2017.07.30	18.3	28.3	758.8	762.6	760.3	764.2	-0.2	1.6	38	70	1
1616	2017.07.29	21.1	23.9	751.7	758.3	753.2	759.9	-1.1	1.3	52	96	1
1617	2017.07.28	22.8	27.2	752.8	756.1	754.3	757.6	-1	0	82	97	1
1618	2017.07.27	22.8	29.4	756.5	762.6	758.1	764.1	-1.6	-0.2	70	88	1
1619	2017.07.26	20.6	28.9	762.4	765.9	763.9	767.6	-1.5	0.8	46	85	1
1620	2017.07.25	22.2	27.8	759.1	764.9	760.6	766.6	0.3	2.1	53	66	1
1621	2017.07.24	23.3	32.2	753.2	757	754.8	758.8	-1.1	2	50	94	1
1622	2017.07.23	23.9	29.4	754.5	755.2	756	756.9	-0.5	0.7	72	96	1
1623	2017.07.22	23.9	34.4	755	758.1	756.5	759.6	-1.6	1.1	44	96	1
1624	2017.07.21	28.9	35.6	757.3	759.3	758.8	761.1	-0.9	1	44	70	1
1625	2017.07.20	26.7	36.1	757.8	761.1	759.4	762.7	-1.5	0.7	39	82	1
1626	2017.07.19	25.6	35.6	760.3	762.4	761.9	764.1	-1.1	0.8	36	90	1
1627	2017.07.18	25.6	32.8	761.1	762.9	762.7	764.5	-1.3	0.8	56	90	1
1628	2017.07.17	25	32.2	759.8	761.6	761.5	763.1	-0.6	1.1	47	90	1
1629	2017.07.16	22.8	31.1	759.1	760.9	760.6	762.4	-0.8	1	46	74	1
1630	2017.07.15	24.4	31.1	758.3	760.1	760	761.7	-1.1	1.5	43	97	1
1631	2017.07.14	25	36.1	759.3	761.1	761	762.7	-1.8	0.5	43	88	1
1632	2017.07.13	26.7	35	759.8	761.8	761.5	763.5	-1.6	1.1	47	79	1
1633	2017.07.12	25.6	34.4	760.9	762.4	762.4	763.9	-0.8	1.2	46	80	1
1634	2017.07.11	23.9	33.3	759.3	760.1	760.8	761.8	-0.8	0.8	44	85	1
1635	2017.07.10	22.8	31.1	759.3	762.1	761	763.8	-1.3	0.3	55	79	1
1636	2017.07.09	21.7	29.4	759.6	762.6	761.1	764.2	-0.8	1.7	36	73	1
1637	2017.07.08	22.2	31.7	754.8	758.5	756.4	760.1	-1	2	37	91	1
1638	2017.07.07	23.9	32.2	755	757.3	756.6	758.8	-1.5	1.1	44	96	1
1639	2017.07.06	23.3	26.7	758.3	762.9	760	764.4	-1.6	0.3	85	97	1
1640	2017.07.05	23.3	28.9	762.1	763.6	763.8	765.4	-0.5	1.2	70	91	1
1641	2017.07.04	24.4	32.2	760.6	762.1	762.1	763.7	-0.8	1.2	48	85	1
1642	2017.07.03	25.6	32.8	760.3	761.6	761.9	763.2	-0.7	0.8	35	79	1
1643	2017.07.02	24.4	32.8	759.6	761.6	761.1	763.3	-1.3	1.6	42	91	1
1644	2017.07.01	25.6	31.7	757.6	759.8	759.3	761.4	-1.2	1.8	61	88	1
1645	2017.06.30	23.3	33.3	759.3	762.1	760.9	763.6	-1.5	0.7	44	67	1
1646	2017.06.29	19.4	32.2	761.6	764.6	763.2	766.1	-1.6	0.2	41	76	1
1647	2017.06.28	17.2	27.8	763.1	765.7	764.8	767.2	-1.1	1.5	29	63	1
1648	2017.06.27	20	25.6	760.1	762.1	761.7	763.8	-0.8	1.8	33	57	1
1649	2017.06.26	21.1	28.3	760.1	762.9	761.6	764.5	-1.1	0.5	26	62	1
1650	2017.06.25	22.8	30.6	759.6	761.4	761.1	763	-1	1.3	28	66	1
1651	2017.06.24	24.4	31.1	750.4	759.3	752.1	760.9	-1.3	3.6	38	88	1
1652	2017.06.23	23.3	30	752.8	758.3	754.3	759.8	-1.3	0	67	94	1
1653	2017.06.22	24.4	30.6	758.8	760.6	760.5	762.3	-1	0.5	55	88	1
1654	2017.06.21	22.2	30	758.5	760.3	760.3	761.8	-1.1	0.7	40	84	1
1655	2017.06.20	21.7	29.4	758.1	760.6	759.5	762.3	-0.5	1	37	94	1
1656	2017.06.19	23.3	31.1	755.5	757.8	757.2	759.4	-1.5	1	57	94	1
1657	2017.06.18	25	32.8	755	757.6	756.5	759.1	-1.2	1.1	57	90	1
1658	2017.06.17	23.3	30	756.5	758.3	758.2	760	-1.1	0.5	65	94	1
1659	2017.06.16	21.7	28.9	756.8	758.5	758.4	760.1	-1	0.5	63	94	1
1660	2017.06.15	22.8	29.4	758.3	760.6	759.9	762.1	-1.3	1	43	76	1
1661	2017.06.14	25.6	31.7	757.8	760.3	759.5	761.9	-0.8	1.2	52	79	1
1662	2017.06.13	24.4	33.9	757.6	760.9	759.2	762.4	-1.5	0.7	42	88	1
1663	2017.06.12	24.4	33.3	760.3	763.4	761.9	765.1	-1.5	0.8	38	79	1
1664	2017.06.11	22.8	33.3	761.8	763.9	763.3	765.7	-1	1.5	37	81	1
1665	2017.06.10	18.3	30	760.1	762.4	761.6	763.9	-0.8	1.3	39	76	1
1666	2017.06.09	15.6	27.8	755.5	759.3	757	760.9	-0.7	1.7	32	75	1
1667	2017.06.08	13.9	23.3	756.1	761.4	757.7	763	-1.8	0.4	38	87	1
1668	2017.06.07	16.7	20	756.8	761.8	758.3	763.3	0.2	1.5	61	90	1
1669	2017.06.06	19.4	25	752.2	756.1	753.7	757.7	-0.2	1.5	39	93	1
1670	2017.06.05	22.2	24.4	751.9	755	753.5	756.6	-1.5	0.5	71	87	1
1671	2017.06.04	17.2	29.4	755.5	761.4	757	763	-2	0.3	45	87	1
1672	2017.06.03	16.7	28.9	759.6	761.4	761.1	762.8	-0.8	1	33	70	1
1673	2017.06.02	17.8	28.3	759.8	761.4	761.4	762.8	-0.8	1.1	25	70	1
1674	2017.06.01	17.2	28.3	759.3	761.1	760.9	762.7	-1.1	1	31	93	1
1675	2017.05.31	18.9	26.1	759.1	761.4	760.7	763	-1.5	0.8	62	97	1
1676	2017.05.30	17.2	21.1	760.9	762.9	762.4	764.3	-1.1	1.2	87	97	1
1677	2017.05.29	17.8	28.3	755.5	761.1	757	762.7	-0.8	1.8	36	100	1
1678	2017.05.28	16.7	23.3	756.3	757.6	757.7	759.2	-1.3	0.6	67	96	1
1679	2017.05.27	16.7	22.2	757.6	758.5	759.1	760.2	-0.5	0.7	59	86	1
1680	2017.05.26	15	25	749.9	758.1	751.3	759.5	0	1.8	46	96	1
1681	2017.05.25	14.4	22.8	746.4	750.7	747.9	752.2	-2.5	-1.1	64	97	1
1682	2017.05.24	15	18.3	753	754	754.4	755.6	-1	1	78	90	1
1683	2017.05.23	16.1	19.4	754.5	759.3	756.1	760.8	-1.5	0.2	76	100	1
1684	2017.05.22	15	21.7	759.1	764.4	760.8	765.9	-1.5	0.5	70	96	1
1685	2017.05.21	15	19.4	765.4	769	767	770.5	-1.3	1.3	52	62	1
1686	2017.05.20	17.8	22.2	760.3	768.2	761.8	769.9	-0.3	2.5	53	91	1
1687	2017.05.19	22.2	32.8	758.1	760.6	759.6	762.2	-1	1.5	42	91	1
1688	2017.05.18	21.7	30.6	758.3	761.1	759.8	762.6	-1.5	1.5	53	84	1
1689	2017.05.17	17.2	31.7	759.1	761.6	760.6	763.2	-1.5	1.1	43	78	1
1690	2017.05.16	13.3	25.6	760.9	762.9	762.4	764.5	-1	1	39	72	1
1691	2017.05.15	13.3	25	756.5	760.1	758.2	761.6	-1.3	1.7	26	51	1
1692	2017.05.14	9.4	26.7	752.2	756.1	753.8	757.6	-1.3	2.6	22	93	1
1693	2017.05.13	10	15	755.2	758.1	757	759.6	-1.6	0.6	70	96	1
1694	2017.05.12	10	14.4	759.6	761.1	761.1	762.6	-0.5	0.5	70	93	1
1695	2017.05.11	11.1	17.2	758.1	760.6	759.6	762.1	-1.1	1.6	54	97	1
1696	2017.05.10	10	24.4	758.8	760.9	760.3	762.4	-1.1	1.3	27	75	1
1697	2017.05.09	8.3	18.3	759.1	761.6	760.6	763.2	-1.5	1.3	22	71	1
1698	2017.05.08	8.9	17.8	758.1	760.9	759.7	762.4	-1.6	1.5	26	63	0
1699	2017.05.07	8.3	17.8	751.2	757	752.8	758.8	-0.8	1.8	35	77	1
1700	2017.05.06	10.6	17.2	743.6	750.4	745	751.9	-0.5	1.5	75	93	1
1701	2017.05.05	15	23.3	744.6	756.3	746.2	757.9	-3.7	-0.3	74	97	1
1702	2017.05.04	11.7	18.9	759.6	766.2	761	767.8	-2.1	1.1	47	90	1
1703	2017.05.03	15	18.3	756.5	765.4	758.2	766.9	0	2.1	34	49	1
1704	2017.05.02	20	26.1	751	756.3	752.5	757.8	-0.7	2.3	24	79	1
1705	2017.05.01	18.3	28.3	751.2	760.6	752.8	762.1	-3.3	0	57	90	1
1706	2017.04.30	21.7	30.6	760.3	763.4	762.1	765	-1.3	1.6	53	94	1
1707	2017.04.29	21.1	32.2	760.6	762.9	762.2	764.6	-1.3	1	41	93	1
1708	2017.04.28	19.4	28.3	756.8	761.4	758.3	763	-0.8	2.5	47	84	1
1709	2017.04.27	15	27.2	754.3	757	755.9	758.5	-1.8	1	52	96	1
1710	2017.04.26	15	21.1	753	756.3	754.6	757.9	-1.3	1.2	68	96	1
1711	2017.04.25	11.7	15.6	753.5	758.8	755.2	760.5	-1.5	0.8	93	100	1
1712	2017.04.24	12.2	13.3	760.3	762.9	761.8	764.4	-1.2	0.8	67	87	1
1713	2017.04.23	9.4	15.6	761.4	764.2	763.1	765.7	-1	1	56	89	1
1714	2017.04.22	11.1	17.8	756.8	761.6	758.4	763.1	-0.2	1.8	87	93	1
1715	2017.04.21	17.8	26.1	754.8	758.1	756.3	759.5	-1.7	1.3	69	97	1
1716	2017.04.20	14.4	27.2	758.3	764.9	760	766.4	-2.3	1.3	51	87	1
1717	2017.04.19	11.7	16.7	765.7	771.7	767.2	773.4	-1.8	0.5	65	86	1
1718	2017.04.18	13.9	22.2	764.9	771	766.4	772.6	-1	2	31	70	1
1719	2017.04.17	16.7	21.7	759.1	763.6	760.7	765.3	-0.7	1.5	57	75	1
1720	2017.04.16	18.9	30.6	757.8	762.6	759.5	764.3	-2.2	1.3	28	81	1
1721	2017.04.15	12.8	23.3	763.4	769.9	765.1	771.5	-2.6	0.5	56	72	1
1722	2017.04.14	12.8	21.7	767.7	770.2	769.4	771.7	-1.3	1.3	32	67	1
1723	2017.04.13	13.9	21.7	768.2	771	769.9	772.5	-1.5	2.1	23	53	1
1724	2017.04.12	18.9	25.6	763.1	767.7	764.8	769.3	-0.7	1.8	28	68	1
1725	2017.04.11	16.1	27.2	762.1	765.1	763.7	766.6	-1.6	1.5	35	70	1
1726	2017.04.10	11.1	25	762.9	765.9	764.5	767.6	-1.5	1	33	69	1
1727	2017.04.09	6.7	21.7	762.6	766.2	764.2	767.8	-1.5	1.8	28	68	1
1728	2017.04.08	5	17.8	758.1	761.8	759.7	763.3	-1	2	17	51	0
1729	2017.04.07	6.7	10.6	746.2	757.3	747.7	759	0.2	2.6	43	65	0
1730	2017.04.06	11.7	14.4	743.1	753.7	744.7	755.2	-3.5	2.1	51	100	1
1731	2017.04.05	15.6	21.7	754.8	759.1	756.2	760.7	-1.5	2	42	62	1
1732	2017.04.04	15.6	27.2	749.5	753.7	751.1	755.4	-1.3	2.5	32	97	1
1733	2017.04.03	9.4	18.9	752.5	763.6	754	765.2	-3.6	0.7	50	93	1
1734	2017.04.02	7.8	18.3	763.6	766.9	765.2	768.5	-1.5	1.8	32	69	1
1735	2017.04.01	8.3	15.6	752.5	763.6	754	765.1	0.6	2.8	52	93	1
1736	2017.03.31	7.2	11.1	751.2	760.9	752.7	762.4	-3.6	0.7	69	97	1
1737	2017.03.30	8.3	12.2	762.1	767.2	763.6	768.8	-2	1	45	68	1
1738	2017.03.29	12.8	19.4	759.8	765.1	761.3	766.9	-1	2.3	32	81	1
1739	2017.03.28	13.9	22.8	755.8	759.1	757.4	760.5	-1.1	1.8	53	93	1
1740	2017.03.27	8.3	22.8	758.3	764.6	760	766.1	-2.1	0	59	100	1
1741	2017.03.26	8.3	12.8	766.4	769.2	768	770.9	-1.5	1.8	72	100	1
1742	2017.03.25	13.3	24.4	763.9	765.4	765.4	767	-0.7	1.2	48	77	1
1743	2017.03.24	2.2	16.1	764.6	773.8	766.2	775.4	-3.3	0.5	39	76	1
1744	2017.03.23	-1.1	8.3	773.2	777.6	774.7	779.2	-2	2	18	47	0
1745	2017.03.22	3.9	15	758.5	772.5	760.2	774.1	-0.8	4.3	17	48	0
1746	2017.03.21	8.3	17.2	758.3	760.3	760	762.1	-1.5	1	48	74	1
1747	2017.03.20	3.9	11.7	761.6	766.4	763.2	768	-1.8	0.7	40	70	0
1748	2017.03.19	2.2	12.2	762.1	767.2	763.7	768.7	-1.1	2	49	93	1
1749	2017.03.18	4.4	13.3	759.3	764.6	761	766.2	-2.1	2	55	93	1
1750	2017.03.17	0.6	9.4	766.4	770.5	767.9	772	-2.3	1.5	27	82	0
1751	2017.03.16	-2.8	5.6	763.9	766.7	765.4	768.3	-0.9	1.3	33	53	0
1752	2017.03.15	-5.6	0	756.5	762.6	757.9	764.3	0	2.3	33	52	0
1753	2017.03.14	-1.7	3.9	748.4	760.1	749.9	761.8	-6.1	3.1	47	92	0
1754	2017.03.13	-1.7	6.1	764.4	773.2	766	774.9	-3.1	0.9	38	92	0
1755	2017.03.12	-2.8	5.6	768.7	771.5	770.2	773.1	-1.8	1.6	28	43	0
1756	2017.03.11	-3.3	3.9	765.1	769.2	766.6	770.9	-0.9	2	22	48	0
1757	2017.03.10	0.6	12.8	756.1	764.4	757.6	766	-1.8	2.8	36	93	0
1758	2017.03.09	8.9	22.8	758.8	763.9	760.4	765.4	-2.2	0.5	13	37	0
1759	2017.03.08	10.6	19.4	760.1	764.2	761.6	765.7	-2.3	2.5	15	72	0
1760	2017.03.07	8.3	21.1	762.4	768.7	763.9	770.4	-2.1	0.5	46	97	1
1761	2017.03.06	1.1	11.7	769.9	774.1	771.6	775.6	-1.5	0.3	38	68	0
1762	2017.03.05	-5	3.9	774.8	779.4	776.4	781	-2.6	1.3	16	44	0
1763	2017.03.04	-3.3	6.1	773.8	776.1	775.3	777.7	-1.2	1.1	22	57	0
1764	2017.03.03	0.6	6.1	766.2	774.1	767.8	775.7	-0.2	2.8	22	67	0
1765	2017.03.02	5.6	16.7	750.7	765.9	752.4	767.6	0.8	3.3	29	78	0
1766	2017.03.01	13.9	25	749.9	760.1	751.6	761.7	-2.8	0.3	52	100	1
1767	2017.02.28	8.3	17.8	761.6	769.5	763.3	771.1	-3	0.3	52	100	1
1768	2017.02.27	3.9	12.8	768.7	771.5	770.4	773.1	-0.7	1.3	32	82	0
1769	2017.02.26	2.2	9.4	757.6	767.9	759.3	769.6	-0.2	2.8	28	47	0
1770	2017.02.25	9.4	21.1	747.9	754.8	749.5	756.3	-3.3	3.8	38	93	1
1771	2017.02.24	12.2	24.4	755.2	758.5	756.9	760.2	-1.7	0.5	47	97	1
1772	2017.02.23	12.2	22.8	755.5	758.1	757.1	759.7	-1.6	1.3	51	97	1
1773	2017.02.22	7.8	16.1	758.1	763.1	759.7	764.7	-1.8	0	63	89	1
1774	2017.02.21	5	12.8	764.4	769.5	765.9	771.1	-2.6	0.7	37	71	0
1775	2017.02.20	7.2	20	762.1	767.7	763.7	769.3	-1	2	24	90	1
1776	2017.02.19	10	21.7	755	761.4	756.7	762.9	-0.2	1.6	35	86	1
1777	2017.02.18	1.1	17.2	754	758.1	755.7	759.6	-2.3	0.5	35	79	0
1778	2017.02.17	-1.1	10	757.3	760.1	758.8	761.8	-1.6	1.2	33	65	0
1779	2017.02.16	0.6	3.9	751.7	758.8	753.4	760.3	-0.3	1.7	34	52	0
1780	2017.02.15	3.3	10.6	746.6	752.8	748.1	754.3	-2.3	2.3	39	70	0
1781	2017.02.14	0	7.2	754.3	762.4	755.8	763.9	-2.6	0	47	76	0
1782	2017.02.13	2.2	7.8	757.3	763.1	758.8	764.6	-0.3	2.5	30	55	0
1783	2017.02.12	7.2	11.7	751.9	760.3	753.7	762	-2.4	2.6	59	83	1
1784	2017.02.11	1.7	11.1	759.1	760.9	760.7	762.4	-2.2	1	42	71	0
1785	2017.02.10	-4.4	2.8	763.1	771.2	764.7	772.9	-2.6	2.3	28	48	0
1786	2017.02.09	-2.2	10.6	747.1	765.4	748.7	766.9	-2.1	4.1	36	89	0
1787	2017.02.08	11.1	22.2	749.9	752.2	751.4	753.7	-0.9	1.8	41	89	1
1788	2017.02.07	10	21.7	750.7	759.3	752.3	760.9	-2.6	-0.2	47	70	1
1789	2017.02.06	1.7	15	760.6	764.9	762.3	766.4	-1.8	1.3	41	86	1
1790	2017.02.05	0	12.2	758.3	767.2	759.9	768.8	-2.5	1.8	29	70	0
1791	2017.02.04	-3.9	4.4	768.7	774.1	770.2	775.6	-2.4	2	19	50	0
1792	2017.02.03	0	3.3	764.9	768.4	766.5	770	-2	2	33	40	0
1793	2017.02.02	3.3	9.4	762.6	766.7	764.2	768.2	-0.8	2.1	33	71	0
1794	2017.02.01	1.1	10	758.5	762.4	760.1	763.9	-1	1.7	43	89	0
1795	2017.01.31	-1.1	13.3	753.2	761.1	754.8	762.8	-2.9	2.1	29	61	0
1796	2017.01.30	0	3.3	754	762.1	755.5	763.7	-0.5	2.6	40	96	0
1797	2017.01.29	1.7	7.8	753.7	756.1	755.4	757.6	-1.6	1.3	38	72	0
1798	2017.01.28	0.6	9.4	753.5	756.3	754.9	757.7	-1.5	0.8	32	56	0
1799	2017.01.27	3.9	6.7	755	757	756.7	758.7	-1.5	1	32	51	0
1800	2017.01.26	7.8	14.4	746.9	755	748.6	756.5	-1.5	3	32	77	1
1801	2017.01.25	7.8	14.4	750.2	755	751.8	756.7	-1.5	1.8	46	71	1
1802	2017.01.24	3.9	8.9	746.9	751.9	748.5	753.6	-0.2	1.8	61	93	1
1803	2017.01.23	4.4	10	745.4	750.2	747	751.9	-1.6	2	89	96	1
1804	2017.01.22	8.3	10.6	751	754	752.5	755.5	-2.2	0.7	93	100	1
1805	2017.01.21	8.3	9.4	755.2	758.5	757	760.1	-1.7	0.2	97	100	1
1806	2017.01.20	4.4	9.4	757.3	760.6	759	762.2	-1.7	0.8	77	97	1
1807	2017.01.19	6	11.1	761.1	763.4	762.8	764.9	-1.3	0.5	57	81	1
1808	2017.01.18	7.2	15.6	757.3	762.4	759	764.1	-1	2	49	100	1
1809	2017.01.17	5	10.6	758.3	767.5	759.9	769.1	-3.1	0.3	92	100	1
1810	2017.01.16	3.3	7.8	769	772.8	770.7	774.4	-1.8	0.6	51	71	0
1811	2017.01.15	2.8	8.3	768.7	771.5	770.2	773.2	-1.6	1.6	31	93	0
1812	2017.01.14	1.1	5	769.2	777.6	770.8	779.3	-2.8	0.2	55	96	0
1813	2017.01.13	6.7	17.8	765.4	777.4	767.1	779	-0.2	3.3	37	83	1
1814	2017.01.12	10.6	21.7	761.6	765.4	763.1	766.9	-2.3	1.3	51	92	1
1815	2017.01.11	3.9	11.1	765.4	769.7	767	771.4	-1.8	1.8	59	93	1
1816	2017.01.10	-5	3.9	765.9	776.1	767.5	777.5	-3.8	0.5	44	62	0
1817	2017.01.09	-8.3	-3.3	777.1	780.6	778.7	782.2	-2.3	1	38	52	0
1818	2017.01.08	-9.4	-4.4	769.5	779.1	771	780.6	-0.6	2.3	32	51	0
1819	2017.01.07	-6.7	-2.8	766.2	769	767.8	770.5	-1.7	1.8	41	85	0
1820	2017.01.06	-2.2	1.7	758.3	767.5	759.8	769	-0.8	2.6	42	82	0
1821	2017.01.05	0	2.2	758.3	761.8	759.9	763.5	-2	1.3	37	76	0
1822	2017.01.04	4.4	13.3	748.6	757	750.2	758.6	-1.3	2.9	24	100	1
1823	2017.01.03	6.1	7.8	749.9	764.2	751.6	765.8	-2.8	-0.5	89	100	1
1824	2017.01.02	5	7.8	765.9	770.2	767.5	771.9	-2	0.5	63	100	1
1825	2017.01.01	3.9	12.2	760.1	769.7	761.7	771.4	0.2	2.2	38	76	0
1826	2016.12.31	-1.7	8.9	759.3	764.9	760.9	766.5	-2.8	0.7	34	69	0
1827	2016.12.30	1.7	5.6	754	763.4	755.5	765	-0.5	2.5	40	65	0
1828	2016.12.29	3.3	7.8	751.7	761.4	753.2	763	-3.3	2.3	46	97	1
1829	2016.12.28	4.4	10.6	760.6	765.9	762.1	767.6	-1.3	2.1	35	68	0
1830	2016.12.27	11.1	18.3	757.3	763.6	759	765.2	-3.1	1.5	47	90	1
1831	2016.12.26	3.9	7.8	766.7	776.8	768.2	778.4	-3	0.5	77	90	1
1832	2016.12.25	2.2	10	769.2	776.3	770.7	777.9	-0.5	1.8	61	97	1
1833	2016.12.24	3.9	8.3	763.9	769.5	765.5	771	-1.6	2	62	100	1
1834	2016.12.23	0	7.8	769.9	773.8	771.5	775.5	-1.3	1.6	46	85	0
1835	2016.12.22	2.8	13.9	759.8	768.7	761.4	770.2	-2.1	4.6	30	65	0
1836	2016.12.21	-1.7	8.3	765.4	767.5	766.9	769	-1.8	1.3	36	75	0
1837	2016.12.20	-2.8	2.8	767.5	777.4	768.9	778.9	-3.3	-0.2	46	66	0
1838	2016.12.19	-0.6	2.8	773.8	779.1	775.5	780.7	-1.3	2.5	42	58	0
1839	2016.12.18	3.3	18.3	754.8	773	756.3	774.6	-1.3	6.6	57	96	1
1840	2016.12.17	-2.2	6.1	757.8	767.5	759.3	769	-3.1	0.5	41	97	0
1841	2016.12.16	-8.3	-2.2	769.9	774.1	771.4	775.6	-1.3	1.3	29	43	0
1842	2016.12.15	-7.2	3.9	758.1	770.8	759.7	772.2	-1	3.1	22	48	0
1843	2016.12.14	2.8	8.3	759.3	763.9	760.9	765.5	-1.5	1.7	34	82	0
1844	2016.12.13	4.4	7.8	761.1	765.4	762.8	767	-0.5	1.5	60	70	0
1845	2016.12.12	5.6	12.2	756.8	762.1	758.5	763.9	-3.6	2.5	52	96	1
1846	2016.12.11	-1.1	4.4	765.7	774.5	767.2	776.2	-2.5	0.5	49	68	0
1847	2016.12.10	-1.1	3.3	771.5	773.8	773	775.3	-1.2	1.3	37	54	0
1848	2016.12.09	-0.6	3.9	765.9	771.5	767.5	772.9	-0.7	2	41	54	0
1849	2016.12.08	2.2	8.9	760.3	765.1	762	766.7	-1.5	2	29	86	0
1850	2016.12.07	5	10.6	756.3	762.6	757.8	764.2	-0.7	2.2	50	93	1
1851	2016.12.06	5.6	7.8	755.2	763.9	757	765.4	-3.6	0.5	61	96	1
1852	2016.12.05	4.4	12.8	760.6	763.4	762.3	765	-2.1	1	51	97	1
1853	2016.12.04	3.3	7.8	763.9	768.2	765.5	769.7	-1.5	0.5	54	76	0
1854	2016.12.03	6.1	10	763.9	767.5	765.5	769	-1	1.3	46	58	0
1855	2016.12.02	7.2	12.2	760.1	763.6	761.5	765.2	-1.5	1.5	40	50	0
1856	2016.12.01	8.3	16.7	749.5	759.3	750.9	760.9	-0.4	2.2	42	96	1
1857	2016.11.30	13.3	20	749.5	758.1	751.1	759.6	-2.2	-0.2	86	100	1
1858	2016.11.29	9.4	17.2	755.8	760.6	757.4	762.3	-2	1.3	69	100	1
1859	2016.11.28	2.2	11.1	762.4	765.7	764.1	767.2	-1.8	0.3	50	89	1
1860	2016.11.27	4.4	11.1	764.9	766.9	766.5	768.6	-1	0.8	38	70	0
1861	2016.11.26	5.6	10.6	764.4	766.2	766.1	767.7	-1.1	1	44	77	1
1862	2016.11.25	7.2	13.9	764.2	767.2	765.9	768.9	-1.8	0.5	67	83	1
1863	2016.11.24	6.7	13.9	764.4	766.9	766	768.5	-1.8	1.5	45	80	1
1864	2016.11.23	1.7	10	767.2	770.2	768.8	771.8	-2	1	35	64	0
1865	2016.11.22	1.7	10	763.1	768.7	764.7	770.3	-0.5	1.5	25	50	0
1866	2016.11.21	2.2	7.8	757.8	762.4	759.5	764	-1	1.8	26	44	0
1867	2016.11.20	3.3	7.8	756.3	758.1	758	759.6	-1.5	1	34	57	0
1868	2016.11.19	6.1	21.1	753.5	761.4	755	763	-3.8	2	47	96	1
1869	2016.11.18	6.1	20.6	762.4	765.7	763.9	767.2	-2.1	0.8	39	83	1
1870	2016.11.17	6.7	16.1	760.3	763.9	762.1	765.5	-1.5	1.3	41	90	1
1871	2016.11.16	5.6	18.9	756.5	759.6	758.2	761.2	-1.3	1.2	39	89	1
1872	2016.11.15	9.4	17.2	756.5	759.3	758.1	760.9	-1.7	0.3	37	83	1
1873	2016.11.14	2.8	12.8	760.1	763.9	761.8	765.5	-1.3	0.2	55	85	1
1874	2016.11.13	1.1	15.6	764.2	767.7	765.8	769.4	-1.8	0.2	33	76	0
1875	2016.11.12	3.3	11.1	766.7	771.5	768.2	773.2	-1.6	2.1	31	65	0
1876	2016.11.11	7.8	17.2	755.8	764.6	757.3	766.3	-1.5	3	34	68	1
1877	2016.11.10	7.2	16.7	757.8	763.9	759.5	765.6	-1.8	0.9	35	68	1
1878	2016.11.09	11.7	18.3	756.5	760.9	758.2	762.6	-1.6	1.6	61	96	1
1879	2016.11.08	5	19.4	760.9	769.2	762.6	770.8	-2.3	-0.4	35	86	1
1880	2016.11.07	7.2	15.6	769.9	773.2	771.5	775	-1.2	1.3	35	77	1
1881	2016.11.06	11.1	20.6	766.7	769.7	768.3	771.3	-0.7	1.3	24	64	1
1882	2016.11.05	8.3	19.4	766.4	769.5	768.1	771	-2	0.6	35	69	1
1883	2016.11.04	12.2	17.2	761.1	767.7	762.8	769.3	-0.5	2	35	70	1
1884	2016.11.03	15	27.8	759.3	763.6	760.9	765.2	-1.8	-0.3	41	100	1
1885	2016.11.02	12.2	21.7	764.6	768.2	766.3	769.7	-1.7	0.2	66	93	1
1886	2016.11.01	9.4	16.1	767.7	769.2	769.3	770.9	-0.8	0.8	67	81	1
1887	2016.10.31	10.6	16.1	761.6	767.5	763.3	769.1	-0.8	1.8	42	72	1
1888	2016.10.30	15.6	26.1	756.3	760.6	757.9	762.2	-2	2.2	47	90	1
1889	2016.10.29	7.8	23.9	760.3	766.4	762	768.1	-2.8	0.5	48	89	1
1890	2016.10.28	10	16.7	763.4	767.2	764.9	768.7	-0.5	2	34	77	1
1891	2016.10.27	10.6	17.2	761.8	770.2	763.5	771.8	-2.8	-0.3	66	100	1
1892	2016.10.26	5.6	13.9	769.7	772.5	771.4	774.2	-1.5	1.1	42	76	1
1893	2016.10.25	8.9	16.7	767.2	770.8	768.8	772.3	-1.2	2.3	34	58	1
1894	2016.10.24	12.8	21.1	758.3	766.4	759.8	768.1	-0.8	2.8	36	70	1
1895	2016.10.23	7.8	20	758.8	761.6	760.6	763.3	-1	1.3	40	71	1
1896	2016.10.22	11.1	16.1	749.9	758.1	751.5	759.8	0	2.2	36	67	1
1897	2016.10.21	15.6	26.1	749.2	756.8	750.9	758.3	-3.3	0.5	67	93	1
1898	2016.10.20	20	28.3	757.8	762.1	759.4	763.6	-1.8	0.3	61	91	1
1899	2016.10.19	18.9	30.6	758.8	762.4	760.5	763.9	-0.8	1.3	48	93	1
1900	2016.10.18	17.2	27.8	757.3	759.6	758.8	761.2	-1.5	1.3	55	97	1
1901	2016.10.17	16.1	27.2	758.3	761.6	759.8	763.3	-1.6	0.3	51	100	1
1902	2016.10.16	12.2	22.2	762.1	767.9	763.6	769.5	-2	0.3	66	100	1
1903	2016.10.15	10.6	20	768.2	771.2	769.9	772.9	-1.5	1.3	45	89	1
1904	2016.10.14	10	18.3	767.7	770.8	769.1	772.4	-1.1	1.5	39	74	1
1905	2016.10.13	12.2	22.2	762.6	766.7	764.2	768.3	-1	2.3	59	100	1
1906	2016.10.12	10.6	21.1	765.4	769.9	766.9	771.4	-1.8	0.3	53	96	1
1907	2016.10.11	8.9	18.9	769.9	772.8	771.6	774.4	-1.8	0.8	40	80	1
1908	2016.10.10	10	18.9	765.9	770.2	767.5	771.9	-0.8	1.7	33	74	1
1909	2016.10.09	13.9	19.4	759.1	765.1	760.6	766.9	-0.7	1.5	44	87	1
1910	2016.10.08	18.3	19.4	759.8	763.4	761.3	764.8	-1.2	0	93	97	1
1911	2016.10.07	16.7	22.8	763.6	766.9	765.3	768.5	-1.3	0.5	74	93	1
1912	2016.10.06	16.1	20.6	767.2	768.4	768.7	770	-0.7	0.7	73	90	1
1913	2016.10.05	15	20.6	766.9	768.7	768.4	770.2	-1.2	0.7	61	93	1
1914	2016.10.04	15	22.8	763.9	767.5	765.4	769	-0.5	1.1	62	90	1
1915	2016.10.03	18.9	24.4	760.3	762.9	762	764.5	-0.7	1.2	47	96	1
1916	2016.10.02	18.3	23.9	760.6	762.9	762.2	764.4	-1.3	0.5	69	100	1
1917	2016.10.01	17.8	19.4	762.1	763.6	763.6	765.2	-0.8	0.5	93	100	1
1918	2016.09.30	16.7	18.9	763.4	764.6	765	766.2	-0.8	0.8	93	97	1
1919	2016.09.29	18.9	21.1	761.4	764.6	762.9	766.1	-0.3	1.8	93	97	1
1920	2016.09.28	18.3	21.7	759.3	761.4	760.9	763	-0.3	0.8	93	97	1
1921	2016.09.27	18.9	24.4	757.8	760.3	759.3	761.9	-1.5	0.8	43	100	1
1922	2016.09.26	18.3	21.1	760.3	764.6	761.8	766.3	-2	0.5	66	93	1
1923	2016.09.25	15.6	23.3	763.6	766.2	765.3	767.8	-1.3	1.6	38	93	1
1924	2016.09.24	18.9	24.4	760.3	764.2	761.8	765.8	-0.5	1.3	69	87	1
1925	2016.09.23	20	30.6	759.6	762.4	761.1	764.1	-1.8	0.7	45	87	1
1926	2016.09.22	21.1	29.4	762.1	764.4	763.7	766	-1	0.6	46	82	1
1927	2016.09.21	22.8	27.8	762.9	764.6	764.5	766.3	-0.7	1	60	91	1
1928	2016.09.20	21.7	26.1	761.8	763.9	763.5	765.5	-0.8	1	69	94	1
1929	2016.09.19	22.8	25.6	759.3	762.1	761.1	763.6	-1	1.1	85	94	1
1930	2016.09.18	22.2	31.1	759.8	762.6	761.5	764.2	-1.5	0.6	54	97	1
1931	2016.09.17	20.6	27.8	762.9	766.4	764.5	768	-1.6	0.3	56	81	1
1932	2016.09.16	19.4	25.6	765.9	767.9	767.4	769.4	-1	1	45	79	1
1933	2016.09.15	21.1	24.4	763.6	766.7	765.4	768.4	-1	1.3	55	73	1
1934	2016.09.14	21.1	34.4	761.1	763.4	762.7	765.1	-1.3	1.3	22	87	1
1935	2016.09.13	21.1	31.1	762.6	766.2	764.2	767.8	-1.7	0.7	45	90	1
1936	2016.09.12	20	28.9	764.4	766.7	765.9	768.4	-1.1	1.1	37	66	1
1937	2016.09.11	23.3	30	758.1	763.9	759.5	765.5	-1.2	2.2	34	82	1
1938	2016.09.10	25.6	33.9	758.3	760.9	759.9	762.4	-1.3	1	54	82	1
1939	2016.09.09	26.7	35	758.1	759.8	759.7	761.5	-0.8	0.8	39	85	1
1940	2016.09.08	24.4	35.6	757.3	759.8	759	761.3	-1.5	0.5	41	88	1
1941	2016.09.07	23.3	33.9	759.1	761.8	760.8	763.4	-2	1.2	47	85	1
1942	2016.09.06	22.2	33.9	760.1	763.1	761.8	764.6	-1.3	1	32	64	1
1943	2016.09.05	18.3	30.6	762.4	766.4	764	768.1	-1.8	0.2	37	76	1
1944	2016.09.04	21.1	27.8	764.9	766.7	766.4	768.2	-0.8	1.1	34	66	1
1945	2016.09.03	21.7	26.7	761.4	764.2	763	765.7	-1	1	44	71	1
1946	2016.09.02	20	26.7	760.6	763.4	762.1	765	-0.8	1.5	39	66	1
1947	2016.09.01	23.3	28.3	756.3	759.8	757.9	761.3	-0.7	1.5	63	88	1
1948	2016.08.31	23.3	31.7	757	761.4	758.6	763	-1.8	0.3	53	82	1
1949	2016.08.30	24.4	32.2	761.1	764.2	762.7	765.9	-1.5	0.6	39	65	1
1950	2016.08.29	22.8	33.9	762.1	764.9	763.9	766.5	-1.8	1.3	46	81	1
1951	2016.08.28	23.9	31.1	764.2	766.9	765.7	768.4	-1.5	1.2	43	88	1
1952	2016.08.27	26.7	32.8	762.9	765.4	764.5	767.1	-1	1.5	42	79	1
1953	2016.08.26	25.6	34.4	760.9	762.6	762.4	764.1	-0.7	1.5	44	87	1
1954	2016.08.25	22.2	30.6	760.9	764.4	762.4	766	-1.1	0	63	79	1
1955	2016.08.24	20	30	764.9	768.4	766.4	770	-1.6	0.9	51	84	1
1956	2016.08.23	20.6	28.3	766.4	769.2	768.1	770.9	-1.2	1.2	43	73	1
1957	2016.08.22	22.8	29.4	758.5	765.7	760.3	767.2	-0.2	1.8	39	69	1
1958	2016.08.21	25	31.7	754.5	757.6	756	759.1	-1.6	1.8	61	90	1
1959	2016.08.20	24.4	32.2	756.5	758.5	758.2	760.2	-0.8	0.5	44	85	1
1960	2016.08.19	24.4	32.2	758.1	760.3	759.7	761.8	-1	0.7	38	79	1
1961	2016.08.18	23.3	32.2	759.3	761.6	760.9	763.3	-1.6	0.8	48	94	1
1962	2016.08.17	23.3	33.9	760.3	763.1	762.1	764.8	-1.8	1.3	46	91	1
1963	2016.08.16	24.4	35.6	761.6	765.7	763.3	767.3	-1.5	0.8	49	91	1
1964	2016.08.15	24.4	35	763.4	766.2	765	767.7	-1	1.8	44	94	1
1965	2016.08.14	27.2	37.2	758.8	763.1	760.4	764.7	-0.8	2	39	77	1
1966	2016.08.13	27.8	37.8	757	759.3	758.7	760.9	-1.1	1.2	43	82	1
1967	2016.08.12	27.2	36.1	757.8	760.3	759.4	761.9	-1.6	0.7	48	79	1
1968	2016.08.11	26.1	35.6	760.9	763.9	762.4	765.7	-1.3	0.5	44	85	1
1969	2016.08.10	25	33.9	763.4	765.4	764.9	767	-1.2	1	49	94	1
1970	2016.08.09	21.1	27.2	763.9	765.9	765.5	767.5	-0.8	1	67	85	1
1971	2016.08.08	22.8	32.2	760.1	763.6	761.6	765.2	-0.2	1.2	33	69	1
1972	2016.08.07	23.9	32.2	756.5	759.6	758.1	761.3	-0.5	1.5	33	60	1
1973	2016.08.06	24.4	32.8	754.3	757	756	758.7	-1.1	1.3	54	94	1
1974	2016.08.05	23.3	27.8	758.1	762.1	759.5	763.6	-1.3	-0.2	65	87	1
1975	2016.08.04	21.7	29.4	762.1	764.2	763.9	765.9	-0.8	0.8	45	81	1
1976	2016.08.03	22.8	27.8	762.9	764.4	764.5	765.9	-0.8	1	56	81	1
1977	2016.08.02	23.9	31.7	760.6	762.9	762.2	764.5	-1	1.8	52	90	1
1978	2016.08.01	25	32.8	759.3	761.1	760.9	762.8	-1.3	1	50	82	1
1979	2016.07.31	23.9	32.8	758.8	760.9	760.5	762.4	-1.1	1.5	57	91	1
1980	2016.07.30	23.9	31.1	757.8	760.1	759.5	761.8	-1.5	1.3	63	94	1
1981	2016.07.29	23.9	32.2	755.2	758.5	756.9	760.3	-0.9	1.8	50	96	1
1982	2016.07.28	25.6	32.8	755.8	758.1	757.4	759.7	-1.3	0.7	59	90	1
1983	2016.07.27	27.8	35	757.8	759.3	759.4	761.1	-1	0.6	35	72	1
1984	2016.07.26	26.7	34.4	758.1	759.6	759.7	761.1	-1	1	41	79	1
1985	2016.07.25	27.8	36.1	756.3	759.6	757.9	761.2	-1.8	1	43	88	1
1986	2016.07.24	27.2	35.6	758.8	760.3	760.4	761.9	-1	1.2	37	72	1
1987	2016.07.23	26.7	36.7	757	759.3	758.6	760.9	-1.3	1	40	79	1
1988	2016.07.22	23.9	33.9	757.8	761.8	759.4	763.4	-1.5	0.7	49	82	1
1989	2016.07.21	22.2	31.7	762.1	765.4	763.9	767	-1.3	0.8	43	87	1
1990	2016.07.20	21.1	30	764.2	765.9	765.7	767.5	-1	0.8	44	93	1
1991	2016.07.19	22.8	31.7	762.6	764.6	764.2	766.4	-1	1.5	43	90	1
1992	2016.07.18	22.8	33.9	761.8	764.4	763.4	766	-2.1	1	49	87	1
1993	2016.07.17	21.7	32.8	762.6	764.6	764.2	766.3	-0.8	1	38	91	1
1994	2016.07.16	22.8	33.3	759.8	762.6	761.3	764.2	-0.8	1.3	44	87	1
1995	2016.07.15	25.6	33.9	757.8	760.1	759.3	761.8	-0.8	1.6	37	74	1
1996	2016.07.14	24.4	36.1	756.5	759.6	758.2	761.2	-1.6	0.8	42	90	1
1997	2016.07.13	24.4	32.2	759.6	762.1	761.1	763.7	-1	0.5	56	88	1
1998	2016.07.12	23.3	30	761.4	763.4	762.9	764.9	-1.3	1	48	82	1
[truncated: 192 more rows]
