# Supplementary material
Source: ML conference proceedings conference paper supplement (https://openreview.net/forum?id=9NzCUqU7i1)
Supplement: supplementary_material [file California Mushrooms.xlsx]

## Sheet: Sheet1
ID	Species class	Species	Name	Pileus Cap Width L	Pileus Cap Width R	Stipe Length L	Stipe Length R	Stipe Thickness L	Stipe Thickness R	Spores major axis L	Spores major axis R	Spores minor axis L	Spores minor axis R
1	0	Agaricus	moronii	6	12	2	7	1.5	3	6	7.5	4	5
2	0	Agaricus	arorae	3	8	4	9	0.5	2.5	4.5	5	3	3.5
3	0	Agaricus	fissuratus	6	21	4	14	1	3.5	6.5	9	4.5	6
4	0	Agaricus	benesii	4	8	5	11	1	2	5	6	3	4
5	0	Agaricus	bernardii	7	16	4	7	3	4.5	5.5	7	5.5	6.5
6	0	Agaricus	bisporus	5	12	2	5	1.5	2.5	6	8.5	4.5	6
7	0	Agaricus	bitorquis	5	15	4	10	2	4	5	6.5	4	5.5
8	0	Agaricus	californicus	4	11	3	7	0.4	1	5	7.5	4	5.5
9	0	Agaricus	campestris	5	10	3	6	1	2	5.5	8	3.5	5
10	0	Agaricus	comtulus	2.5	4	3	5	4	7	4	5	3	3.5
11	0	Agaricus	incultorum	2.5	6	1.5	3.5	1	1.5	7	8	5	6
12	0	Agaricus	diminutivus	1.5	2.5	3	6	2.5	3.5	4	5	3	4
13	0	Agaricus	brunneofibrillosus	4	15	4	15	1.5	2.5	5	6.5	3.5	4
14	0	Agaricus	fuscovelatus	3.5	8	4	10	1	2	7	8	5	6
15	0	Agaricus	hondensis	7	14	8	14	1.5	2.5	4	6	3	4.5
16	0	Agaricus	lilaceps	8	20	9	19	3	5	5	6.5	4	5
17	0	Agaricus	micromegathus	2.5	4	2.5	4.5	4	7	4.5	5	3	3.5
18	0	Agaricus	pattersonae	5	15	6	15	2.5	3.5	7	9	6	6.5
19	0	Agaricus	perobscurus	8	12	6	12	1.5	2	6.5	8	4.5	5
20	0	Agaricus	deardorffensis	7	19	8	15	2.5	3.5	4	6	3.5	4.5
21	0	Agaricus	smithii	7	12	5	12	2	3	7	9	5	5.5
22	0	Agaricus	subrufescens	6	13	6	12	1.5	2.5	5.5	6.5	4	4.5
23	0	Agaricus	subrutilescens	6	14	6	16	1	2	4	6	3.5	4.5
24	0	Agaricus	sylvicola	6	12	6	12	1.5	2	5.5	6.5	3.5	4
25	0	Agaricus	xanthodermus	5	17	4	14	1	3.5	5	6	4	4.5
26	1	Boletus	appendiculatus	7	14	5	9	3	6	11.5	13.5	3.5	4.5
27	1	Boletus	chyrsenteron	4	9	5	10	1	1.5	11.5	14	4	6
28	1	Boletus	citriniporus	4	8	4	7	1	3	12	13.5	3.75	4.5
29	1	Boletus	dryophilus	4	12	4	8	1	2.5	11.5	16	5	6.5
30	1	Boletus	abieticola	9	13	9	13	4	5	14	17.5	4.5	5.5
31	1	Boletus	amygdalinus	6	10	5	9	1	3	11.2	16	5.2	8
32	1	Boletus	fragans	6	15	4	10	1	3.5	13	17.5	5	7.8
33	1	Boletus	pulverulentus	5	8	4	7	1	2.5	14	17.5	4	6.5
34	1	Boletus	tomentipes	9	13	8	13	2.5	3.5	14	14	7	7
35	1	Boletus	spadiceus	4	10	5	15	1	2	9	11	4	5.5
36	1	Boletus	mendocinensis	7	10	10	11	1	1.5	15	21	4	5
37	1	Boletus	edulis	7	25	7	20	3	8	12	17	4	6
38	1	Boletus	flaviporus	6	11	6	12	1	2	12	15	5	6
39	1	Boletus	orovillus	8	15	5	9	2.5	4.5	5.5	6.5	3.5	4
40	1	Boletus	pulcherrimus	9	17	7	14	8	8	13	15.5	5	6
41	1	Boletus	regineus	7	14	7	13	3	4	11.5	13.5	3.5	4.5
42	1	Boletus	regius	8	15	5	9	3	4	13	15.5	4	5
43	1	Boletus	rex-veris	9	18	5	10	2	6	12.5	18	4	5
44	1	Boletus	rubripes	6	16	6	15	3	5	12	16.5	4.5	5.5
45	1	Boletus	smithii	7	15	7	15	3.5	7	13.5	16	4.5	5.5
46	1	Boletus	subtomentosus	4	12	4	8	1	2	10	15	4	5
47	1	Boletus	truncatus	5	10	5	10	1.5	2.5	12	15	4.5	6
48	1	Boletus	zelleri	4	11	5	10	1	3	11	15	4	6
49	2	Amanita	augusta	4	12	5	15	1	2	8	12	6	8
50	2	Amanita	calyptroderma	8	25	10	20	1.5	4	8	11	5	6
51	2	Amanita	constricta	6	12	9	17	1	2	9.5	11.5	8.5	10
52	2	Amanita	magniverrucata	7	14	6	12	4	4	9	11.5	6	8
53	2	Amanita	muscaria	6	39	7	16	2	3	9	13	6.5	9.5
54	2	Amanita	novinupta	5	14	6	12	1.5	3.5	7	8.5	5.5	6
55	2	Amanita	ocreata	5	13	10	22	1.5	3	9	12.5	7	9
56	2	Amanita	pachycolea	8	18	10	25	1	3	11.5	14	10	12
57	2	Amanita	pantherina	4	15	7	11	1	2.5	9.5	13	7	9.5
58	2	Amanita	phalloides	3.5	15	4	18	1	3	7	12	6	10
59	2	Amanita	protecta	4	14	5	15	1	3	10	12	8.5	10
60	2	Amanita	smithiana	7	14	7	17	2	4	10.5	12	6.5	9
61	2	Amanita	vaginata	5.5	10	6	13	1.2	2	8	11.5	7.5	10
62	2	Amanita	velosa	5	11	4	11	1	2.5	8.5	12	7	11
63	3	Clitocybe	albirhiza	2	9	2	6	0.5	1.2	5	6	2.5	3.5
64	3	Clitocybe	rivulosa	2	4	2	4	0.4	0.8	4	5	2	3
65	3	Clitocybe	deceptiva	1.2	5	1.5	4	0.3	0.5	6	7.5	3.5	4
66	3	Clitocybe	glacialis	2	6	2	6	1	1.5	5.5	7	3.5	4.5
67	3	Clitocybe	flaccida	2	9	3	7	0.4	0.6	4	4.5	3.4	3.4
68	3	Clitocybe	nebularis	5	25	5	15	1.5	4	5.5	8.5	3.5	4.5
69	3	Clitocybe	nuda	4	14	3	6.5	1	2.5	6	8	4	5
70	3	Clitocybe	sclerotoidea	1	3	1	4	0.4	0.8	7.5	10	3	3.5
71	3	Clitocybe	tarda	2	6	1.5	5	0.3	0.7	5.5	8	3.5	4
72	4	Cortinarius	croceus	3	8	3	6	0.5	1	7	9	4	5
73	4	Cortinarius	californicus	3	8.5	8	15	0.5	1.5	7	9	4	4.5
74	4	Cortinarius	fuligineofolius	4	8.5	5.5	11	0.8	1.5	8.8	10.1	5.9	6.6
75	4	Cortinarius	glutinosoarmillatus	4	10	8	16	1.8	3	14	15	7.8	8.3
76	4	Cortinarius	largentii	6.5	14	7	10	2.7	5	8.8	10.9	4.7	5.8
77	4	Cortinarius	magnivelatus	4	8	3	6	1.5	3	10	13.5	5.5	7
78	4	Cortinarius	phoeniceus	3	8	4	7	0.6	1.2	6	7.5	4	4.5
79	4	Cortinarius	vanduzerensis	3.5	7	8	16	1	1.5	11	14.5	7	8.5
80	4	Cortinarius	pallidifolius	5	9	10	15	1	1.5	9	12	5	6.5
81	4	Cortinarius	citrinifolius	3	5.5	7	9	0.9	1.2	8	10	5.5	7
82	4	Cortinarius	rubicundulus	3.5	8	5	8	1	3	6	7.5	3.5	5
83	4	Cortinarius	sierraensis	2	4	2	5	0.4	0.6	7.5	9	5	5.5
84	4	Cortinarius	thiersii	1.5	5	3	5	0.4	1	7.7	10	4.7	5.8
85	4	Cortinarius	verrucisporus	3	7	1	3	1	2	11	13	7	8.5
86	4	Cortinarius	xanthodryophilus	4	10	4	8	2	3	9	12	5	6.5
87	5	Entoloma	medianox	5	13	5	11	1.5	3	7	8.5	6	7.5
88	5	Entoloma	cinereolamellatum	2	10	4.5	15	2	3	7.7	9.7	6.5	8.5
89	5	Entoloma	holoconiotum	2	6	3	6	0.3	0.6	8	11	6	7.5
90	5	Entoloma	lividoalbum	7	9	7	11	1.5	2.5	6.5	10	6.5	9
91	5	Entoloma	sericellum	1	4.5	2.5	5.5	0.4	0.8	9	11.5	7	8.5
92	5	Entoloma	subcarneum	4	7	5	10	0.7	1.5	9	12.5	6.5	9.5
93	5	Entoloma	chalybeum	1.2	3	2	6	0.15	0.4	8.4	11.8	6	8.8
94	5	Entoloma	cinereolamellatum	2	10	4.5	15	1.5	2.5	7.7	9.7	6.5	8.5
95	5	Entoloma	vernum	2	5.5	3	10	0.4	0.8	8	11	5	8
96	6	Gyromitra	californica	5	12	4	8	2	4	13	18	8	10.5
97	6	Gyromitra	esculenta	5	9	3	6	1	3	18	23	9	12
98	6	Gyromitra	montana	5	10	2	8	3	7	25	35	12	16
99	6	Gyromitra	infula	3	8	2	6	1	2.5	17	20	7	9
100	6	Gyromitra	perlata	1.5	9	3	3	1	2.5	28	34	12	16
101	7	Hygrocybe	coccinea	2.5	5	2.5	5.5	0.5	1	7	9.5	4	5
102	7	Hygrocybe	conica	2	9	5	10	0.5	1	9	13	5	6.5
103	7	Hygrocybe	flavescens	2	6	3.5	7	0.7	1.2	7.5	9	4	5
104	7	Hygrocybe	flavifolia	1.5	3.5	2	4	0.4	0.6	7	9	4	5.5
105	7	Hygrocybe	miniata	1.5	3.5	2	4	0.3	0.5	6	9	4	6
106	7	Hygrocybe	psittacinus	1.5	4	4	9	0.3	0.5	8	10	5	6
107	7	Hygrocybe	punicea	4	12	3	14	0.5	2	8	11	5	6
108	7	Hygrocybe	singeri	2	5	4	14	0.5	1	9.5	11.5	5	6.5
109	8	Inocybe	adaequata	4	8	4	8	1	2	9	12	6	7.5
110	8	Inocybe	brunnescens	3	7	4	9	1	1.5	8	10.5	5	6
111	8	Inocybe	chelanensis	2	4	1.5	4	0.4	1.2	13	19	5.5	8
112	8	Inocybe	citrifolia	2	4	4.5	7	0.3	0.7	11.4	11.4	5.3	5.7
113	8	Inocybe	corydalina	4	6	4	9	1	2	7.5	11	5	6
114	8	Inocybe	flocculosa	2	7	3	8	0.3	1	10	12	5	5.5
115	8	Inocybe	fraudans	2.5	6.5	4	8	0.5	1.7	9	11.5	5.5	7
116	8	Inocybe	insinuata	2	4	2.5	5	0.3	0.6	7.5	9	4.5	5
117	8	Inocybe	pallidicrema	1.2	3	2.5	4	0.3	0.4	7.5	10.5	4.5	5
118	8	Inocybe	griseolilacina	1.5	3	2	4	0.4	0.7	8	10.5	4.5	6
119	8	Inocybe	pudica	2	4	2	4	0.5	0.8	7.5	10	4.5	5
120	8	Inocybe	sororium	2.5	6.5	4	10	0.3	0.8	10	14	6	8
121	8	Inocybe	subdestricta	2	4	2.5	5	0.25	0.5	8	10	5	5.5
122	9	Lactarius	aestivus	4.5	9.8	3	5.7	1.5	2.5	8.5	9.9	6.6	7.7
123	9	Lactarius	alnicola	6	13	2	5	1.5	2.5	7	10	6	8
124	9	Lactarius	rubidus	1.5	4.5	2	5	0.4	1	7.5	10	6	7
125	9	Lactarius	deliciosus	5	13	3	6	1.5	2.5	7.5	11	6	7.5
126	9	Lactarius	kauffmanii	5	10	5	11	1.5	2.5	7.5	9.5	6.5	8
127	9	Lactarius	pallescens	5	11	4	8	1.2	2	9	10	7	8
128	9	Lactarius	pubescens	3	7	2.5	4	1.5	2	6.5	7.5	4	5
129	9	Lactarius	rubrilacteus	5	12	2	5	1	2.5	7	9	6	7.5
130	9	Lactarius	rubriviridus	3	6	4	5	0.5	0.7	8	10	7	8.5
131	9	Lactarius	xanthogalactus	4	11	3	6	1	2	7	8	6	6.5
132	9	Lactarius	fallax	3	9	2.5	6	0.8	1.5	9	12	8.5	11
133	10	Marasmius	armeniacus	0.4	1.2	1	3	0.5	0.5	8.5	10.5	3	4
134	10	Marasmius	calhouniae	1	3	1.5	4	0.2	0.5	9	10	3.5	4.5
135	10	Marasmius	copelandii	0.5	2	3	8	0.1	0.3	13	18	2.5	3.5
136	10	Marasmius	curreyi	0.4	0.8	1.5	3	0.1	0.1	9	12	4	5
137	10	Marasmius	oreades	1.5	4	2	6	0.2	0.5	7	8.5	4	5.5
138	10	Marasmius	plicatulus	1	4	5	11	0.15	0.35	11	14.5	5	6.5
139	10	Marasmius	quercophilus	0.2	0.5	1	2.5	0.1	0.1	7.5	9	3	4.5
140	11	Mycena	acicula	0.2	0.8	1	5	0.05	0.05	8.5	11.5	3	4
141	11	Mycena	tenerrima	0.2	0.4	0.4	1	0.01	0.09	8	10.5	4	6
142	11	Mycena	amicta	0.5	1.5	3	7	0.1	0.3	8	9.5	4	5
143	11	Mycena	aurantiomarginata	1	2	2.5	7	0.1	0.2	7.5	9	4	5.5
144	11	Mycena	californiensis	0.7	2	2	7	0.1	0.2	7.5	9	4	4.5
145	11	Mycena	capillaripes	1	2	4	6	0.1	0.2	8	11	4	6.5
146	11	Mycena	citrinomarginata	1	2	1	4	0.1	0.15	8	12.5	4	5.5
147	11	Mycena	galericulata	2	5	3	14	0.2	0.5	8.5	10.5	6	7.5
148	11	Mycena	galopus	0.5	2	4	7.5	0.1	0.2	9	13	5	6
149	11	Mycena	nivicola	1.5	3	2.5	9	0.2	0.3	8.5	11.5	5	6
150	11	Mycena	haematopus	1	3	2.5	7	0.2	0.3	7.5	9	4.5	5.5
151	11	Mycena	maculata	1.5	4	2	9	0.15	0.4	7.5	9.5	5	5.5
152	11	Mycena	oregonensis	0.2	0.8	1	2.5	0.01	0.09	6.5	8.5	3	3.5
153	11	Mycena	purpureofusca	0.7	3	3	7	0.1	0.4	7	10	5	6
154	12	Russula	albidula	5	8	3	6	1.5	2	6.5	9.5	6	7.5
155	12	Russula	basifurcata	4	7	3	7	1	3	7	9.5	6.5	8
156	12	Russula	brevipes	6	12	4	6	2	3	8	10.5	6.5	9
157	12	Russula	cerolens	4	11	3	7	1	2.5	7	8	5	6
158	12	Russula	densifolia	7	13	3	7.5	2	4	7	9.5	5.5	7
159	12	Russula	californiensis	7	14	4	8	1.5	3	8	10.5	6.5	8.5
160	12	Russula	cantharellicola	7	12	2	7.5	2.5	3.5	7.5	10	6.5	7
161	12	Russula	olivacea	8	16	8	13	2	3.5	8.5	10.5	7.5	9
162	12	Russula	queletii	4	7	2	7	1.5	2.5	6.5	9	6	7.5
163	12	Russula	sanguinea	4	10	5	10	1	2.5	7.8	9.5	6.5	8.5
164	12	Russula	abietina	3.3	9	2.6	7.5	1.4	2.5	7.5	9.5	6	8
165	12	Russula	adusta	5.5	10	2.7	4.8	1.8	2.3	6.5	9.5	5	7.5
166	12	Russula	albonigra	6.2	9	5	5	2	2	8.2	11	5.8	7.8
167	12	Russula	dissimulans	6	16	4	8.5	1.5	4	7.3	9.1	6	8.1
168	12	Russula	cascadensis	4	4.7	2.1	2.7	1.1	1.6	6.2	8.5	4.5	6
169	12	Russula	pectinata	2.9	11.1	2.4	6.9	0.7	2.4	6.8	9	4.8	7
170	12	Russula	granulata	4.7	8.6	5	7.6	1.4	2.2	5	8	4.2	6
171	12	Russula	brunneola	5.2	15	3.6	9	1.1	3.8	6	10	5.25	8
172	12	Russula	viscida	5.3	7.5	4.5	4.8	1.8	2.5	6.2	9.8	5.2	8.5
173	12	Russula	stuntzii	4	10.5	4.9	11.2	1.1	2.9	6.8	10	6.2	8.9
174	12	Russula	smithii	8	15	6	8	2	4.5	8	11.5	7.5	10
175	12	Russula	crassotunicata	3.2	8	1.9	7.5	0.7	2.6	8.3	11.5	6.3	10
176	12	Russula	pallescens	2.4	7	3.8	9	0.5	1.1	7	9	5.5	7
177	12	Russula	silvicola	4	9	4	10	1	3	6.7	10.5	5.7	8.6
178	13	Suillus	americanus	5	10	5	11	0.5	1	8	12	3.8	4.5
179	13	Suillus	brevipes	3.5	10	1.5	6	1.3	3.5	7.5	10	3	4.5
180	13	Suillus	caerulescens	6	13	2	7	1	3.5	6.5	9.5	3	4
181	13	Suillus	fuscotomentosus	4	15	4	7	2	3.5	9.5	11.5	3.5	4.5
182	13	Suillus	acerbus	8	13.6	4	10	1.5	2.5	9.3	12	3.3	4
183	13	Suillus	albidipes	5	12	3	8	1	2.5	6.6	8.8	2.5	3
184	13	Suillus	borealis	7	11	2	4	1.5	2	6	8.5	3	5
185	13	Suillus	brunnescens	4	15	3	8	1	2.5	6.6	8.8	2.8	3.2
186	13	Suillus	californicus	6	9	3	6	1.5	2	7	8	3.5	5
187	13	Suillus	glandulosipes	6	12	4	11	1	2	6	9	3	4
188	13	Suillus	granulatus	5	12	4	8	1	2	7	9	2.5	3.5
189	13	Suillus	imitatus	4	12	3.5	6	1.5	2.5	7	9	4	4.5
190	13	Suillus	lithocarpi-sequoiae	7	14	8	11	2.2	3.3	7.5	9.8	3.2	3.8
191	13	Suillus	luteus	5	12	4	8	1	2.5	7	9	2.5	3
192	13	Suillus	monticolus	4	7	3	5	2	4	8.5	11.2	3	4
193	13	Suillus	pseudobrevipes	8	15	3	6	1	2	7	9	2.5	3.5
194	13	Suillus	punctatipes	6	16	3	5	1	2	7.5	9	3	4
195	13	Suillus	reticulatus	6	8	10	12	1	1.5	9	11	3	4
196	13	Suillus	riparius	5	12	3	8	0.5	1.5	8	11.5	3.2	5
197	13	Suillus	sibiricus	5	10	5	11	0.5	1	8	12	3.8	4.5
198	13	Suillus	subolivaceus	6.5	12	7	10	1	1.5	9	11	3	4
199	13	Suillus	quiescens	6	10	2	5	2	3	7	10	2	3
200	13	Suillus	lakei	4	12	3	7	1.5	2.5	7.5	10	3	4
201	13	Suillus	megaporinus	2	7	1	2	0.5	1	7	10	3.5	4
202	13	Suillus	ponderosus	9	25	9	14	3	6	8	10	3.8	5
203	13	Suillus	pungens	5	13	3	8	1.5	2	9	10	3	3.5
204	13	Suillus	tomentosus	5	11	5	9	1.5	3	8	11	3	4
205	13	Suillus	umbonatus	2	8	2	5	0.5	1	8	10	3.5	4
206	13	Suillus	volcanalis	8	15	4	6	2	4.5	7	10	3	3.5
207	14	Tricholoma	atroviolaceum	3.5	9	4	8	1.5	3	7.5	9	5	6
208	14	Tricholoma	dryophilum	5	15	6	13	1	4.5	5	6	4	4.25
209	14	Tricholoma	equestre	5	13	4	8	1.5	3	6	7.5	3.5	5
210	14	Tricholoma	focale	5	13.5	4.5	11	1.5	3	4.8	5.8	2.8	3.8
211	14	Tricholoma	fracticum	5	10	3	8	1.5	2.5	5.5	7.5	4	5.5
212	14	Tricholoma	griseoviolaceum	4	11	6	14	1	2	5	7	3.5	5
213	14	Tricholoma	imbricatum	6	15	5	10	2	3.5	5.5	7	4	5
214	14	Tricholoma	inamoenum	1.5	3	4	8	0.4	0.5	9.6	14.4	5.3	7.7
215	14	Tricholoma	moseri	2	4.5	2	5	0.5	1	6.5	10	3.5	5
216	14	Tricholoma	muricatum	5	12	3	6	1	3.5	4.5	6	3	3.5
217	14	Tricholoma	murrillianum	5	25	4	15	1	6	5	7	4.5	5.5
218	14	Tricholoma	murrillianum	5	10	7	12	1.5	2.5	6	9	4	6.5
219	14	Tricholoma	portentosum	5	12	6.5	15	1.5	2.8	5.3	8.6	3	5.8
220	14	Tricholoma	saponaceum	4	9	4.5	8	1.5	2	5	6.5	3.5	4.5
221	14	Tricholoma	scalpturatum	3	7	2	6	1	2	4.5	6	3	4
222	14	Tricholoma	sejunctum	3.5	7.5	4	9	1	1.5	5.3	8.2	3.8	6.2
223	14	Tricholoma	terreum	1.5	5	2.5	5	0.5	1	5	7.5	3.5	4.5
224	14	Tricholoma	vernaticum	4	14	5	13	2	3.5	8.5	11	4	6
225	15	Hygrophorus	agathosmus	3	7	4	7	1	2	7.5	9.5	4	5.5
226	15	Hygrophorus	caeruleus	4	8	3	5	1	2.5	6.5	8.5	4.5	5
227	15	Hygrophorus	chrysodon	3	7	2.5	7	0.5	1.3	8	10	4	5
228	15	Hygrophorus	gliocyclus	3	9	3	5	1.5	2.5	8.5	10	4.5	6
229	15	Hygrophorus	hypothejus	2.5	7	4	8	0.5	1.2	7.5	10	4	5
230	15	Hygrophorus	eburneus	2.5	7	4	12	0.5	1.5	6.5	8	3.5	5
231	15	Hygrophorus	pudorinus	6	14	12	15	1.5	2	7.5	10.5	5	6
232	15	Hygrophorus	purpurascens	4	11	2	9	1.5	2.5	5.5	7.5	3	4.5
233	15	Hygrophorus	subalpinus	6	12	4	10	3	5	7.5	10.5	4.5	5.5
234	15	Hygrophorus	pusillus	1	5	2	7	0.1	0.8	7	9	4	5
235	15	Hygrophorus	pudorinus	5	10	4	9	1	2	6.5	9.5	4	5.5
236	15	Hygrophorus	bakerensis	4	15	7	14	0.8	2.5	7	9	4.5	5
237	16	Leccinum	brunneum	6	10	8	15	1.5	3	15.5	19.5	4	5
238	16	Leccinum	discolor	8	12	7	9	1	2	15	19.5	4.5	6
239	16	Leccinum	largentii	8	15	10	12	1.5	3.5	13.3	17.1	4	6
240	16	Leccinum	manzanitae	5	18	9	17	2	4	13	17.5	4	5
241	16	Leccinum	scabrum	5	14	8	14	2	4	14	18	5	6
242	16	Leccinum	arbuticola	7	10.5	9	13	1	3.5	15	17.1	4.5	5.8
243	16	Leccinum	armeniacum	8	11	8	12	1.5	3	11	14.5	3.8	5
244	16	Leccinum	aurantiacum	8	15	10	17	2	3	12	13.5	3.5	4.5
245	16	Leccinum	californicum	5	7.5	5	8	1	1.5	14.5	17.5	5.5	6.5
246	16	Leccinum	constans	10	14	12	15	2	3	15.5	18	4	5
247	16	Leccinum	insigne	10	15	10	15	2	2.5	14	16.5	5	6.5
248	16	Leccinum	montanum	3	8	5	10	1	1.5	14	17.5	4	6
